# Supplementary material for: Cross-sectional study of the financial cost of training to the surgical trainee in the UK and Ireland
Source: PubMed Central journal article supplement — BMJ Open. 2017 Nov 15;7(11):e018086. doi: 10.1136/bmjopen-2017-018086 (PMC5695344; doi:10.1136/bmjopen-2017-018086), 2017-11-15
Supplement: bmjopen-2017-018086.draft_revisions.pdf [file bmjopen-2017-018086.draft_revisions.pdf]

# BMJ Open

BMJ Open is committed to open peer review. As part of this commitment we make the peer review history of every article we publish publicly available.

When an article is published we post the peer reviewers' comments and the authors' responses online. We also post the versions of the paper that were used during peer review. These are the versions that the peer review comments apply to.

The versions of the paper that follow are the versions that were submitted during the peer review process. They are not the versions of record or the final published versions. They should not be cited or distributed as the published version of this manuscript.

BMJ Open is an open access journal and the full, final, typeset and author-corrected version of record of the manuscript is available on our site with no access controls, subscription charges or pay-per-view fees (<http://bmjopen.bmj.com>).

If you have any questions on BMJ Open's open peer review process please email [editorial.bmjopen@bmj.com](mailto:editorial.bmjopen@bmj.com)

# BMJ Open

## A CROSS-SECTIONAL STUDY OF THE FINANCIAL COST OF TRAINING TO THE SURGICAL TRAINEE

|                                 |                                                                                                                                                                                                                                                                                                                                                                                                       |
|---------------------------------|-------------------------------------------------------------------------------------------------------------------------------------------------------------------------------------------------------------------------------------------------------------------------------------------------------------------------------------------------------------------------------------------------------|
| Journal:                        | <i>BMJ Open</i>                                                                                                                                                                                                                                                                                                                                                                                       |
| Manuscript ID                   | bmjopen-2017-018086                                                                                                                                                                                                                                                                                                                                                                                   |
| Article Type:                   | Research                                                                                                                                                                                                                                                                                                                                                                                              |
| Date Submitted by the Author:   | 06-Jun-2017                                                                                                                                                                                                                                                                                                                                                                                           |
| Complete List of Authors:       | O'Callaghan, John; Association of Surgeons in Training<br>Mohan, Helen; Association of Surgeons in Training<br>Sharrock, Anna ; Association of Surgeons in Training<br>Gokani, Vimal; Association of Surgeons in Training<br>Fitzgerald, J; The Association of Surgeons in Training,<br>Williams, Adam; Association of Surgeons in Training<br>Harries, Rhiannon; Association of Surgeons in Training |
| <b>Primary Subject Heading</b>: | Medical education and training                                                                                                                                                                                                                                                                                                                                                                        |
| Secondary Subject Heading:      | Surgery                                                                                                                                                                                                                                                                                                                                                                                               |
| Keywords:                       | MEDICAL EDUCATION & TRAINING, SURGERY, HEALTH ECONOMICS                                                                                                                                                                                                                                                                                                                                               |
|                                 |                                                                                                                                                                                                                                                                                                                                                                                                       |

SCHOLARONE™  
Manuscripts

1  
2  
3 A CROSS-SECTIONAL STUDY OF THE FINANCIAL COST OF TRAINING  
4  
5 TO THE SURGICAL TRAINEE  
6  
7

8 John M O'Callaghan, Helen M Mohan, Anna E Sharrock, Vimal J Gokani, J Edward Fitzgerald,  
9

10 Adam P Williams, Rhiannon L Harries; on behalf of the Council of the Association of  
11  
12 Surgeons in Training  
13  
14

15  
16 Corresponding author: Rhiannon.harries@doctors.org.uk  
17  
18

19  
20 Address: Association of Surgeons in Training, 35-43 Lincoln's Inn Fields, London WC2A 3PE  
21  
22

23 <http://www.asit.org>  
24  
25

26  
27 <http://twitter.com/ASiTofficial> @ASiTofficial,  
28  
29

30 **Running head:** The cost of surgical training  
31  
32

33 **Category:** Original research  
34  
35

36 **Funding:** Nil  
37  
38

39  
40 **Keywords:** surgical training, cost of training, surgical education, medical  
41  
42 education, health economics  
43  
44

45 **Word count:** 3659  
46  
47  
48  
49  
50  
51  
52  
53  
54  
55  
56  
57  
58  
59  
60

**Abstract****Objectives:**

Applications for surgical training has declined over the last decade and anecdotally, the costs of training at the expense of the surgical trainee are rising. We aimed to quantify the costs surgical trainees are expected to cover for postgraduate training.

**Design:**

Prospective, cross-sectional questionnaire based study.

**Setting/Participants:**

A non-mandatory online questionnaire for UK-based trainees was distributed nationally. A similar national questionnaire was distributed for Ireland, taking into account differences between the healthcare systems. Only fully completed responses were included.

**Results:**

There were 848 and 58 fully completed responses from doctors based in the UK and Ireland, respectively. Medical students in the UK reported a significant increase in debt on graduation by 55% from £17,892 (2000-2004) to £27,655 (2010-2014),  $p < 0.01$ . 41% of specialty trainees in the UK indicated that some or all of their study budget was used to fund mandatory regional teaching. By the end of training, a surgical trainee in the UK spends on average £9,105 on courses, £5,411 on conferences and £4,185 on exams, that are not reimbursed. Irish trainees report similarly high costs. Most trainees undertake a higher degree during their postgraduate training. The cost of achieving the mandatory

1  
2  
3 requirements for completion of training ranges between £20,000-£26,000 (dependent on  
4  
5 specialty), except oral and maxillofacial surgery, which is considerably higher (£71,431).  
6  
7

8 **Conclusions:**  
9

10  
11 Medical students are graduating with significantly larger debt than before. Surgical trainees  
12  
13 achieve their educational requirements at substantial personal expenditure. To encourage  
14  
15 graduates to pursue and remain in surgical training, urgent action is required to fund the  
16  
17 mandatory requirements and annual training costs for completion of training and provide  
18  
19 greater transparency to inform doctors of what their postgraduate training costs will be.  
20  
21 This is necessary to increase diversity in surgery, improve work-life balance and ensure  
22  
23 surgery remains a popular career choice.  
24  
25  
26  
27  
28  
29  
30  
31  
32  
33  
34  
35  
36  
37  
38  
39  
40  
41  
42  
43  
44  
45  
46  
47  
48  
49  
50  
51  
52  
53  
54  
55  
56  
57  
58  
59  
60

### Strengths and Limitations of this Study

- This national study provides a large cross-sectional data set on the experience of the costs of surgical training by surgical trainees across all ten surgical specialties in the UK and Ireland
- The costs analysed provided a comprehensive overview of the breadth and depth of financial costs incurred by trainees.
- The wide-distribution of the survey and breadth of responses increased the likelihood that it is representative of trainee experience.
- It is recognised that some costs could be subject to recall bias, however the figures reported are largely consistent with the calculations we have made using the current prices of exams, courses and society memberships to verify the results.
- The overall number of completed responses was higher than required to power the study

## Introduction

The number of trainees applying for surgical training has declined over the last decade<sup>1</sup>.

Many factors including low workforce morale, poor work-life balance and recent contractual issues may act as a deterrent to medical students considering a career in surgery<sup>2</sup>. The cost of completing the mandatory postgraduate requirements to secure a higher surgical training programme post has been estimated to be between £2,735 and £20,780, dependent on surgical specialty (average £3,360) compared with medicine £2,815 and anaesthetics £2,215<sup>3</sup>. Following entry to higher surgical training, there are considerable ongoing costs incurred by trainees in order to meet the requirements for completion of training as mandated by the Joint Committee on Surgical Training (JCST). These include educational courses, conference attendance, Royal College membership and fellowship examinations and annual subscriptions, and specialty society membership subscriptions. In addition, trainees pay annual expenses such as registration with the respective regulatory bodies, the UK General Medical Council (GMC) or Irish Medical Council (IMC), medical indemnity insurance costs, and the JCST fee (paid by trainees in the UK).

In 2007, The Association of Surgeons in Training (ASiT) conducted a survey of UK surgical trainees, to assess the financial costs to trainees in surgical training<sup>4</sup>. The results demonstrated that the mean debt on qualification from medical school was over £20,000. However, in recent years there have been many new challenges facing the current generation of surgical trainees, including increased student debt, secondary to a rise in annual university tuition fees of up to £9,000 per annum<sup>5</sup>. It has previously been calculated that medical students graduating currently are unlikely to repay their student loan debt before reaching the 30-year point at which it is written off<sup>6</sup>. The salaries of male and female medical graduates diverge such that by the age of 55, the average male medical school

1  
2  
3 graduate earns 35% more<sup>6</sup>. This means that the average female graduate repays more when  
4  
5 debt is low, but a lower amount when debt is high, compared to male graduates<sup>6</sup>. The cost  
6  
7 of living has also increased; in the ten years, preceding November 2016 the UK Consumer  
8  
9 Price Index (CPI) rose a total of 23.8%<sup>7</sup>.

10  
11  
12  
13 To assess the current situation, we repeated a refined study, with a broader remit and more  
14  
15 in depth assessment of cost pressures on trainee surgeons in both the UK and Ireland. The  
16  
17 main aim was to assess the true financial cost of training to the surgical trainee in each of  
18  
19 the ten surgical specialties.  
20  
21  
22  
23  
24  
25  
26  
27  
28  
29  
30  
31  
32  
33  
34  
35  
36  
37  
38  
39  
40  
41  
42  
43  
44  
45  
46  
47  
48  
49  
50  
51  
52  
53  
54  
55  
56  
57  
58  
59  
60



## Methods

### Participants and setting

Postgraduate surgical training in the UK and Ireland consists of a minimum of 8 years of training (except for oral and maxillofacial surgery (OMFS) and urology which is a minimum of 7 years) following completion of the initial post-qualification two-year Foundation Programme (or intern year in Ireland) **Figure 1**. Competitive entry occurs prior to both Core and Higher specialist training levels, except for neurosurgery, cardiothoracic surgery and Oral and maxillofacial surgery (OMFS) in the UK (and trauma and orthopaedics in Scotland), where run-through training from Core level exists. Core surgical knowledge is assessed by the Intercollegiate Membership of the Royal College of Surgeons (MRCS) examination and specialty specific knowledge during the later phase of higher surgical training is assessed by the Intercollegiate Fellowship of the Royal College of Surgeons (FRCS) examination.

In the UK and Ireland, the Joint Committee on Surgical Training (JCST) are responsible for curriculum development and quality assurance of all the surgical training programmes in the ten defined surgical specialities (cardiothoracic surgery, general surgery, neurosurgery, OMFS, otolaryngology, paediatric surgery, plastic surgery, trauma and orthopaedics, urology and vascular surgery). All surgical trainees are required to register with the JCST and to pay an annual fee (£255 at time of submission) that has more than doubled between 2010 and 2016. This fee supports the running costs of the JCST to manage trainee enrolment and recommendation for certification; the work of each of the ten surgical specialties 'Specialty Advisory Committee' (SACs); curriculum review and development and website support. The JCST training fee is covered for trainees in Ireland directly by funding received by the RCSI from the Health Service Executive (HSE).

1  
2  
3 In the UK, Local Education Training Boards (LETBs) provide funding to Local Education  
4  
5 Providers (essentially the hospital where a trainee is employed) to cover the direct costs of  
6  
7 delivering education and training. This sum includes two components: firstly, salary support  
8  
9 of 50% of each doctor's basic salary; the second component is a placement fee of £12,400  
10  
11 per year, per trainee, to fund all costs involved in delivering education and training needs. It  
12  
13 is from this placement fee that trainees apply for study funding support towards courses  
14  
15 and conferences essential to their training, often referred to as 'study leave budget', with a  
16  
17 restricted amount available dependent on the LETB. Funding for military trainees in the UK  
18  
19 regular Defence Medical Services (DMS) is overseen by External Education and Training  
20  
21 Support (EETS) within the Defence Deanery. Funding for training courses for military  
22  
23 trainees is therefore at the discretion of the Defence Consultant Advisor and Defence  
24  
25 Deanery<sup>8</sup>. In Ireland, the RCSI receives funding from HSE to provide surgical training, which  
26  
27 covers the cost of the JCST fee, delivering the curriculum, human factors and operative skills  
28  
29 training days. However, other elements essential for CCT are not directly provided. More  
30  
31 details of funding for Irish trainees is given in **Appendix 1**.  
32  
33  
34  
35  
36  
37  
38

39 At the time of survey distribution, there were 5,323 surgical trainees in the UK and 438  
40  
41 surgical trainees in Ireland<sup>9</sup>.  
42  
43  
44

### 45 **Questionnaire design and distribution**

46  
47  
48 A novel 54-item, survey tool was developed, consisting of free-text, binomial and variable  
49  
50 scale responses. The questionnaire was designed with reference to previously published  
51  
52 guidelines on conducting questionnaire research<sup>10-12</sup>. The online platform *SurveyMonkey*<sup>®</sup>  
53  
54 (Palo Alto, CA, USA, [www.surveymonkey.com](http://www.surveymonkey.com)) was used to build the survey. All individual  
55  
56 question items were compulsory. No individually identifiable information was collected;  
57  
58  
59  
60

1  
2  
3 therefore, non-responders could not be identified for follow-up. No incentives were offered  
4  
5 for participation. A link to the online survey was distributed to members of ASiT, surgical  
6  
7 specialty associations, and local and national mailing lists of surgical trainees. All surgical  
8  
9 trainees in the UK including foundation doctors were included, as appropriate to the level of  
10  
11 analysis. A modified version of the survey was circulated to ASiT members and surgical  
12  
13 trainees in Ireland, which reflected relevant differences in health systems and training.  
14  
15 Interns were excluded from distribution of the survey in Ireland as contact details were only  
16  
17 available for those registered as surgical trainees with RCSI. Data collection took place from  
18  
19 2<sup>nd</sup> December 2015 to 26<sup>th</sup> April 2016. The ethical dimensions of this non-mandatory,  
20  
21 anonymous evaluation survey were considered and no concerns were identified.  
22  
23  
24 Participants consented to the use of the analysis, distribution and publication of  
25  
26  
27  
28  
29  
30  
31  
32  
33  
34  
35  
36  
37  
38  
39  
40  
41  
42  
43  
44  
45  
46  
47  
48  
49  
50  
51  
52  
53  
54  
55  
56  
57  
58  
59  
60

anonymised grouped results.

This study was undertaken by ASiT (<http://www.asit.org>), a pan-surgical specialty professional body and registered charity in the UK (no: 274841) working to promote excellence in surgical training for the benefit of junior doctors and patients alike. ASiT is independent of the National Health Service (NHS), Surgical Royal Colleges, and specialty associations.

#### **Data analysis**

Only fully completed questionnaires were included in the analysis. Due to the differing healthcare structures and funding systems of postgraduate education and training in UK and Ireland, a modified version of the survey was used for Ireland and the results are presented separately. Military trainees were excluded due to low numbers and a separate training

1  
2  
3 funding structure. Data was graphed and analysed in *Excel*<sup>®</sup> (Microsoft, USA). Significance  
4  
5 testing for continuous variables was conducted using Mann-Whitney U Test in *Stata*<sup>®</sup>  
6  
7 (Statacorp, USA); statistical significance was accepted at  $p < 0.05$ . Survey sample size  
8  
9 calculations were based on standard published formulae and assuming a population of 6000  
10  
11 individuals, with  $\alpha = 0.01$ , 209 responses would be sufficient for margin of error of 0.03<sup>13</sup>.  
12  
13 For readability, all values are presented to the nearest pound (£) or euro (€). We have used  
14  
15 the exchange rate as accessed on 13<sup>th</sup> January 2017 of £0.87= €1.00 to provide comparisons  
16  
17 between the two currencies<sup>14</sup>. The study results are reported in concordance with STROBE  
18  
19 guidance on observational studies<sup>15</sup>. Results regarding costs are presented displaying  
20  
21 trainees year of graduation in blocks of 5 years to show trends over time.  
22  
23  
24  
25  
26

### 27 **Costs of CCT to the trainee in each surgical specialty**

28  
29  
30 Using guidance available from the JCST the total cost of achieving the mandatory and  
31  
32 desirable requirements for CCT in each of the surgical specialties was also calculated. Where  
33  
34 conference attendance was mandated, but no exact minimum number described, the cost  
35  
36 of at least one attendance during the training period was calculated. For courses which  
37  
38 required re-validation at the end of training, the reduced course cost of re-validation rather  
39  
40 than a full attendance was used. Course costs from recognised bodies, such as the BMA and  
41  
42 Surgical Royal Colleges, were used in all calculations, where applicable. Conference costs  
43  
44 were calculated using the reduced rates available to society members or early registrations  
45  
46 where possible.  
47  
48  
49  
50  
51  
52  
53  
54  
55  
56  
57  
58  
59  
60

## Results

Of 1603 surveys submitted, a total of 868 fully completed responses were included in the analysis from doctors based in the UK, and 58 fully completed responses from doctors based in the Republic of Ireland. Respondent demographics by country of work are detailed in

### Table 1.

#### United Kingdom-specific responses

For the purposes of monetary analysis UK military doctors (n=20) were excluded from the main analysis, however a summary of military doctors' survey findings can be found in **Appendix 2**. This resulted in a total of 848 respondents for analysis. Of 848 respondents, 751 (88%) graduated from medical school in the UK. 89% (672) of these UK medical school graduates graduated with debt, with a mean of £25,404. The average debt by year of graduation has increased by 55% from £17,892 to £27,655 comparing graduates in the most recent generation (2010-2014) with those graduating between 2000 and 2004 (p<0.01)

### Figure 2.

There were 659 specialty trainee respondents from the UK (grades CT/ST1 to ST8) **Table 2**. Of these, 93% (618) responded that they were currently entitled to a study leave budget. The median value was £600 per annum (range £500-£835). Three LETBs reported no defined budget limit (Yorkshire and Humber, South West and Thames Valley). 41% of all respondents in specialty training indicated that some (31% of respondents) or all (10% of respondents), of their study budget was used to fund mandatory regional teaching.

By the end of training, a surgical trainee in the UK can expect to have spent on average £9,105 on courses, £5,411 on conferences and £4,185 on exams (£18,701) that they have

1  
2  
3 not been reimbursed through any source. Expense per year on conferences has marginally  
4  
5 increased from £331 to £414 comparing older graduates with the more recent generation  
6  
7 (2000-2004 versus 2010-2014,  $p=0.28$ ). However, course expenses per year have increased  
8  
9 significantly; the most recent graduates from medical school, graduating in the years 2010-  
10  
11 2014, have spent on average £1,311 per year. This is an increase of 121% on the annual  
12  
13 amount spent by medical school graduates graduating between 2000 and 2004 ( $p<0.01$ )  
14  
15

16  
17 **Figure 3.**

18  
19  
20 400 respondents (47%) from the UK have undertaken a postgraduate degree since  
21  
22 graduating from medical school, with this proportion rising by the later stages of training  
23  
24 (ST7-8 and post-CCT (Certificate of Completion of Training) fellow) to 68% (96/141). The  
25  
26 average cost of the degree, including university fees and loss of earnings was estimated by  
27  
28 respondents at £18,009; with an MD/PhD being the most popular higher degree completed  
29  
30 (24.8%, mean cost £27,882), followed by MSc (21.3%, mean cost £11,090).  
31  
32

33  
34  
35 732 respondents from the UK (86%) and 340 of 349 trainees level ST3-ST8 (97%) pay an  
36  
37 annual subscription to one of the four surgical royal colleges (mean £305 for all trainees,  
38  
39 mean £386 for ST3-ST8). 700 respondents (82%) pay annually to their SAC-defined specialty  
40  
41 society (mean £343) and 672 (79%) are members of the British Medical Association. Over  
42  
43 the last year, the mean amount spent on journals was £72 and on textbooks was £212.  
44  
45  
46  
47

48  
49 **Ireland-specific responses**

50  
51 Of the 58 respondents, 57 were currently working in Ireland and one was on fellowship in  
52  
53 the USA **Table 1.** 25 (43%) reported that they were currently entitled to a training fund  
54

55  
56 **Appendix 1.** In the past year, trainees spent on average £1278 (€1469) on mandatory  
57  
58 courses, including travel expenses to courses, many of which are outside of Ireland, of which  
59  
60

1  
2  
3 a mean of £784 (€902) euros was not reimbursed. Trainees spent a mean of £1,977 (€2,321)  
4  
5 on non-mandatory courses, of which a mean of £1,850 (€2,164) was not reimbursed. In the  
6  
7 past year, respondents had spent a mean of £1,153 (€1,353) on attending conferences, of  
8  
9 which a mean £1,005 (€1,183) was not reimbursed. Since graduation, across all grades  
10  
11 trainees had spent a mean £4,829 (€5,669) on examinations, of which a mean £3,402  
12  
13 (€4,004) was not reimbursed. For senior trainees (ST8), an average £9,796 (€11,500) had  
14  
15 been spent on exams, of which £5,396 (€6,351) was not reimbursed.  
16  
17

18  
19  
20 47 respondents (n=81%) from Ireland had undertaken a post-graduate degree since  
21  
22 graduating from medical school. The MCh was the most popular post-graduate degree  
23  
24 (n=15, 26%), followed by the MSc (n=13, 22%) and MD (n=11, 19%). The average estimated  
25  
26 total monetary cost of undertaking a postgraduate degree to the trainee, including course  
27  
28 fees and loss of income, was £22,093 (€25,936).  
29  
30  
31

### 32 33 **Estimated costs of training (UK and Ireland) using CCT essential and desirable criteria**

34  
35  
36 The costs range between £20,000 (€23,479) to £26,000 (€30,523) depending on surgical  
37  
38 specialty, except OMFS, which is considerably higher (£71,431 or €83,858) due to the dual  
39  
40 qualification in medicine and dentistry as well as having significantly more mandatory  
41  
42 training courses than other specialties **Appendix 3**.  
43  
44

45  
46  
47 Only the minority of the costs are tax deductible, add to this the estimated cost of a  
48  
49 postgraduate degree (£18,009 or €21,142), which many surgical trainees will also undertake  
50  
51 at their own expense, and the estimated costs to the trainee increase to approximately  
52  
53 £40,000 (€46,958, excluding OMFS).  
54  
55  
56  
57  
58  
59  
60

## Discussion

This study has shown that individual doctors incur many thousands of pounds in personal expense after graduating from medical school to pursue a career as a surgeon and to meet the requirements to complete surgical training. These costs are incurred in addition to the significant debt built up by most medical school graduates, a debt burden likely to rise further as a greater proportion of students graduate under increased student tuition fees in the UK. Many of the costs paid by the trainee towards their training are not recognised as tax deductible, yet are incurred to cover requirements that are essential to progress through training schemes, and therefore to maintain one's livelihood. Consultant surgeons-to-be now spend considerably more per year on courses than in the past, and these now represent the single largest training cost. Efforts to make surgery an attractive and inclusive career must include an equitable distribution of training costs to the trainee.

Individual trainees spend significant amounts on courses that are not actually mandatory as documented in CCT requirements. We speculate there are two reasons for this; firstly, surgical trainees will undertake courses above and beyond the minimum requirements to develop their skills. Gaps in knowledge and experience delivered in current training posts are likely to contribute to this, such that simulation courses are necessary to address training needs. As such, issues with training programmes failing to meet trainee's educational needs are instead transferred to trainees, who still obtain this necessary training at their own cost. Secondly, to be competitive for higher surgical training and for consultant posts, trainees may undertake additional courses and extracurricular activities.

We have identified a regional variation in what amount is available to trainees, despite the standardised placement fee from the LETB. Study budgets for specialty trainees were lower



1  
2  
3 than the values released in response to the recent FOI request by Varley *et al* in 7 out of 10  
4  
5 LETBs (North Central, South and North West London, North West England, East of England,  
6  
7 Kent Surrey and Sussex and North East England), and equal in three LETBs (East Midlands,  
8  
9 Wales, West Midlands)<sup>16</sup>. It is desirable that study budgets are standardised across the UK,  
10  
11 in both amount and that they should not be top-sliced to provide mandatory regional  
12  
13 teaching, and in the longer term all items deemed essential for CCT (including the JCST fee),  
14  
15 should be funded directly, without expense to the trainee. ASiT has previously highlighted  
16  
17 this issue of uncontrolled geographical variation, calling for an equitable approach through  
18  
19 national standardisation<sup>17</sup>.  
20  
21  
22  
23

24  
25 Irish trainees bear similar high costs in surgical training to their UK counterparts, not  
26  
27 surprisingly given that JCST requirements are the same. The higher cost of courses for Irish  
28  
29 trainees may reflect increased travel and accommodation expenses, as many courses  
30  
31 require travel outside of Ireland and the exclusion of Irish interns from the study, who are  
32  
33 less likely to have undertaken expensive technical skills courses. The higher cost of exams  
34  
35 may reflect in part a higher proportion of Irish trainees who undertake USMLE examinations  
36  
37 to pursue a fellowship in the USA, as well as increased travel expenses to intercollegiate  
38  
39 examinations often held in the UK. While funding is available to reimburse some of these  
40  
41 expenses, it falls short of being sufficient to avoid trainees bearing the greatest burden of  
42  
43 the cost. These costs are on top of annual mandatory costs such as membership or  
44  
45 fellowship of RCSI. These are a significant additional cost- for example, the 2016/2017  
46  
47 subscription rate is £315 (€370) for fellows and £226 (€265) for members), and the annual  
48  
49 Irish Medical Council(IMC) retention fee (£477 (€560) for those registered for less than 3  
50  
51 years and £515 (€605) for those registered for more than 3 years). Of note, the payment for  
52  
53  
54  
55  
56  
57  
58  
59  
60

1  
2  
3 the Irish Medical Council (IMC) is an annual payment and cannot be split across the year  
4  
5 which places a significant financial burden on trainees at the time of the year when they  
6  
7 move jobs and incur considerable additional expenses.  
8  
9

10  
11 Doctors need to be aware in advance of what their chosen pathway is likely to cost them,  
12  
13 and this study has provided the most detailed assessment yet for both UK and Irish surgical  
14  
15 trainees. It is difficult to compare the costs to other medical specialties as few similar  
16  
17 studies have been undertaken in other disciplines. One calculation for the training costs  
18  
19 towards the completion of CCT in Obstetrics and Gynaecology estimated slightly less than  
20  
21 for surgical trainees, at £14,224<sup>18</sup>. Another calculation for only the early stages of training in  
22  
23 other specialties was also slightly less for medicine and anaesthetics, than surgical  
24  
25 specialties<sup>3</sup>. Comparisons to other professional careers, such as solicitors, are also difficult,  
26  
27 but working in the private sector has additional benefits. After qualifying with a law degree,  
28  
29 solicitors must complete a Legal Practice Course (LPC), which costs £8,500-£15,000  
30  
31 dependent on type of course and location<sup>19</sup>. It is however possible to have this cost covered  
32  
33 by a law firm if obtaining a training contract in advance, and many law firms will also  
34  
35 provide a living expense grant of several thousand pounds per year<sup>20</sup>.  
36  
37  
38  
39  
40  
41

42  
43 Research by the University of Kent for the Department of Health has provided cost-  
44  
45 estimates for the training of various doctor grades from the start of medical school  
46  
47 onwards<sup>21</sup>. This work found that the total cost of training a consultant was £564,112, with  
48  
49 some contributions that came largely from the individual (such as undergraduate university  
50  
51 fees, lost earnings, and postgraduate training fees) and others that came predominantly  
52  
53 from the state (clinical placement, tuition and replacement)<sup>21</sup>. It is not possible from the  
54  
55 document to disentangle the values independently contributed by each party.  
56  
57  
58  
59  
60

1  
2  
3 An important consideration frequently overlooked in these analyses relates to the hospital  
4 activity performed by trainees generating hospital income. Doctors in training have a value  
5 as well as a cost, which should be taken into account to offset such cost-estimates. Two UK-  
6 based studies have sought to quantify this within surgical training<sup>22,23</sup>. In general surgery, an  
7 analysis of 1,184 out-patient clinic consultations demonstrated that trainees delivered a  
8 quarter of all out-patient related income, averaging £36,452 per trainee<sup>22</sup>. This was  
9 sufficient to offset 95% of the trainee's average basic salaries. Within ENT surgery, clinical  
10 activity undertaken by SHO grade doctors was calculated to generate an annual net income  
11 of £73,048 (4.3 times higher than their employment costs)<sup>23</sup>. Registrars generated an annual  
12 net income of £121,587 (5.4 times their employment cost). In total, 94% of trainees  
13 included in this analysis generated more hospital income than their employment costs.  
14  
15 Given the benefit derived from hospitals from trainee-related clinical activity, it is  
16 reasonable that a proportionate amount of the associated costs of training should be borne  
17 by the employing hospitals.  
18  
19

20  
21  
22 The costs analysed in this study present a comprehensive overview of the breadth and  
23 depth of costs incurred by trainees. The survey was widely distributed across regions,  
24 specialties and grades, increasing the likelihood that it is representative of trainee  
25 experience. Future studies should seek to understand the balance of costs incurred by the  
26 health system in supporting training, which are poorly understood, the influence of training  
27 cost on career choice, and wider international comparisons on the costs of training in  
28 different health systems.  
29  
30  
31  
32  
33  
34  
35  
36  
37  
38  
39  
40  
41  
42  
43  
44  
45  
46  
47  
48  
49  
50  
51  
52  
53  
54  
55  
56  
57  
58  
59  
60

## Conclusions

Medical students are graduating with increasing debt. Surgical trainees achieve their educational requirements through considerable personal expenditure, with a total estimated monetary cost to the trainee in the region of £40,000 (£47,000). The Certificate of Completion of Training in surgical specialties comes with significant costs, which until now have not been accurately estimated. The cost goes far beyond the national training fee paid to the JCST annually in the UK, and greater transparency is immediately necessary to inform doctors of what their postgraduate training costs will be across all specialties. We strongly believe that the costs of mandatory surgical training should be covered by the Local Education and Training Boards, including the JCST fee and the costs of achieving CCT mandatory requirements. Furthermore, funding should be made available for non-mandatory surgical educational activity deemed beneficial by the trainee's educational supervisor, to ensure surgeons are trained to the highest level to provide excellent care. This is necessary to increase diversity in surgery, improve work-life balance and make surgery a popular career choice again.

## Acknowledgements

We thank all those trainees who took the time to complete the survey. We acknowledge the work done by Edward Fitzgerald and Charles Giddings on the previous 2007 costs of surgical training survey.

## Contributors

RLH and JEFF conceived the study. All authors designed the questionnaire. JMOC collected the data. JMOC, HMM and RLH analysed the data. All authors were responsible for compiling and editing the manuscript, and approving the final article.

## Competing interests

The authors are either current or previous surgical trainees, and current or past elected members of the Council of the Association of Surgeons in Training (Registered Charity No. 274841). JEFF is an employee of KPMG Global Health Practice, Honorary Clinical Advisor to the Lifebox Foundation charity, and a Trustee of the SURG Foundation research charity. The authors have no other relevant financial or personal conflicts of interest to declare in relation to this paper.

## Funding

This research received no specific grant from any funding agency in the public, commercial or not-for-profit sectors.

## Data sharing statement

1  
2  
3 Summary data is available from the corresponding author at president@asit.org. Consent to  
4  
5 data sharing was sought prior to survey completion, and the presented data are anonymised  
6  
7  
8 grouped, hence risk of individual identification is low.  
9  
10  
11  
12  
13  
14  
15  
16  
17  
18  
19  
20  
21  
22  
23  
24  
25  
26  
27  
28  
29  
30  
31  
32  
33  
34  
35  
36  
37  
38  
39  
40  
41  
42  
43  
44  
45  
46  
47  
48  
49  
50  
51  
52  
53  
54  
55  
56  
57  
58  
59  
60

For peer review only

**Table 1.** Basic Demographics. Respondents divided by country of work.

| Demographic           | United Kingdom            | Ireland               |
|-----------------------|---------------------------|-----------------------|
| Number                | 848                       | 58                    |
| Male: Female (%)      | 518:327 (61.3:38.7, 3 NR) | 35:23 (60:40)         |
| Mean Age (years)      | 31.6 (range 23-55)        | 31.3 (range 25 to 41) |
| LTFT Trainees (%)     | 36 (4.3)                  | 0                     |
| Academic Trainees (%) | 69 (8.1)                  | N/A                   |

*NR= Not Reported, LTFT= Less than full time training*

For peer review only

**Table 2.** Specialty, stage of training and LETB (Local Education and Training Board) for respondents from UK.

| Which specialty do you intend to pursue?                                                                                                                                                                                                                                                                                                              | What is your stage of training?                                                                                                                                                                                                                                                                                                                                                             | In which LETB/Deanery do you work?                                                                                                                                                                                                                                                                                                                                                                                                                                       |
|-------------------------------------------------------------------------------------------------------------------------------------------------------------------------------------------------------------------------------------------------------------------------------------------------------------------------------------------------------|---------------------------------------------------------------------------------------------------------------------------------------------------------------------------------------------------------------------------------------------------------------------------------------------------------------------------------------------------------------------------------------------|--------------------------------------------------------------------------------------------------------------------------------------------------------------------------------------------------------------------------------------------------------------------------------------------------------------------------------------------------------------------------------------------------------------------------------------------------------------------------|
| Cardiothoracic Surgery: 32 (3.8%)<br>General Surgery: 296 (34.9%)<br>Neurosurgery: 28 (3.3%)<br>Oral and Maxillofacial: 19 (2.2%)<br>Otolaryngology: 75 (8.8%)<br>Paediatric Surgery: 29 (3.4%)<br>Plastic Surgery: 66 (7.8%)<br>Trauma and Orthopaedics: 172 (20.3%)<br>Vascular Surgery: 59 (5.4%)<br>Urology: 59 (7.0%)<br>Other/Unsure: 26 (3.1%) | Foundation Year 1: 12 (1.4%)<br>Foundation Year 2: 63 (7.4%)<br>ST1/CT1/SHO1: 148 (17.5%)<br>ST2/CT2/SHO2: 96 (11.3%)<br>CT3/SHO3: 10 (1.2%)<br>ST3/SPR1: 78 (9.2%)<br>ST4/SPR2: 59 (7.0%)<br>ST5/SPR3: 77 (9.1%)<br>ST6/SPR4: 59 (7.0%)<br>ST7/SPR5: 60 (7.1%)<br>ST8/SPR6: 67 (7.9%)<br>Post CCT: 17 (2.0%)<br>Clinical Fellow: 35 (4.1%)<br>Research Post: 53 (6.3%)<br>Other: 14 (1.7%) | Scotland: 70 (8.3%)<br>Northern Ireland: 49 (5.8%)<br>Wales: 51 (6.0%)<br>North East: 42 (5.0%)<br>North West: 80 (9.4%)<br>Yorkshire and Humber: 55 (6.5%)<br>East Midlands: 51 (6.0%)<br>West Midlands: 70 (8.3%)<br>East of England: 61 (7.2%)<br>Thames Valley: 41 (4.8%)<br>Kent, Surrey and Sussex: 41 (4.8%)<br>Wessex: 41 (4.8%)<br>South West: 61 (7.2%)<br>North East and Central London: 43 (5.1%)<br>North West London: 44 (5.2%)<br>South London: 46 (5.4%) |

CT= Core Training, NCE = North Central and East London, SPR= Specialist Registrar, ST= Specialist Training.



**Table 3.** Specialty and stage of training for respondents from Ireland.

| Which specialty do you intend to pursue? | What is your stage of training? |
|------------------------------------------|---------------------------------|
| Cardiothoracic Surgery: 2 (3%)           | ST1/CT1/SHO1: 13 (22%)          |
| General Surgery: 22 (38%)                | ST2/CT2/SHO2: 10 (17%)          |
| Neurosurgery: 1(2%)                      | ST3/SPR1: 12 (21%)              |
| Oral and Maxillofacial: 0                | ST4/SPR2: 5 (9%)                |
| Otolaryngology: 2 (3%)                   | ST5/SPR3: 4 (7%)                |
| Paediatric Surgery: 0                    | ST6/SPR4: 2 (3%)                |
| Plastic Surgery: 3(5%)                   | ST7/SPR5: 1 (2%)                |
| Trauma and Orthopaedics: 20(34%)         | ST8/SPR6: 3 (5%)                |
| Vascular Surgery: 2(3%)                  | Clinical Fellow: 1 (2%)         |
| Urology: 6 (10%)                         | Research Post: 1 (2%)           |

CT= Core Training, SPR= Specialist Registrar, ST= Specialist Training.

## References

1. Joint Committee on Surgical Training National Selection Leads Group, Verbal Communication 2016.
2. Jaunoo SS, King TR, Baker RF, Adama HL. A national survey of reasons why students and junior doctors choose not to pursue a career in surgery. *Annals of the Royal College of Surgeons* 2014;**96 (Suppl)**:192-94
3. Stroman L, Weil S, Butler K, McDonald C. The cost of a number: can you afford to become a surgeon? *The Bulletin of the Royal College of Surgeons of England* 2015;**97(3)**:107-11 doi: 10.1308/147363515x14162390057944[published Online First: Epub Date] | .
4. *The Cost of Surgical Training, Position Statement*. London, UK: Association of Surgeons in Training, 2007.
5. *Student Loans in England: Financial Year 2015-16*. Glasgow, UK: The Student Loans Company, 2016.
6. Ercolani MG, Vohra RS, Carmichael F, Mangat K, Alderson D. The lifetime cost to English students of borrowing to invest in a medical degree: a gender comparison using data from the Office for National Statistics. *BMJ open* 2015;**5(4)**:e007335 doi: 10.1136/bmjopen-2014-007335[published Online First: Epub Date] | .
7. *Statistical bulletin: UK consumer price inflation: Nov 2016*: Office for National Statistics, 2016.
8. *Defence healthcare education and training (DHET)- Applications polic for defence medical services (DMS) external education and training, 4-6-3. 1.2 ed*. Joint Services Publication, 2014.

- 1  
2  
3 9. Joint Committee on Surgical Training and Royal College of Surgeons in Ireland, Verbal  
4  
5 Communication.  
6  
7  
8  
9 10. Jones TL, Baxter MA, Khanduja V. A quick guide to survey research. Annals of the Royal  
10  
11 College of Surgeons of England 2013;**95**(1):5-7 doi:  
12  
13 10.1308/003588413x13511609956372[published Online First: Epub Date] | .  
14  
15  
16 11. Eysenbach G. Improving the quality of Web surveys: the Checklist for Reporting Results  
17  
18 of Internet E-Surveys (CHERRIES). Journal of medical Internet research 2004;**6**(3):e34 doi:  
19  
20 10.2196/jmir.6.3.e34[published Online First: Epub Date] | .  
21  
22  
23 12. Woodward CA. Questionnaire construction and question writing for research in medical  
24  
25 education. Medical education 1988;**22**(4):345-63  
26  
27  
28 13. JE B, JW K, CC H. Organizational research: determining appropriate sample size in survey  
29  
30 research. Information Technology, Learning and Performance Journal 2001;**19**(1):43-50  
31  
32  
33 14. ECB. Euro foreign exchange reference rates: European Central Bank, 2017.  
34  
35  
36 15. von Elm E, Altman DG, Egger M, Pocock SJ, Gotsche PC, Vandenbroucke JP. The  
37  
38 Strengthening the Reporting of Observational Studies in Epidemiology (STROBE) statement:  
39  
40 guidelines for reporting observational studies. Lancet (London, England)  
41  
42 2007;**370**(9596):1453-7 doi: 10.1016/s0140-6736(07)61602-x[published Online First: Epub  
43  
44 Date] | .  
45  
46  
47  
48 16. Varley I, Kumar A. Cost of training in oral and maxillofacial surgery: beyond the second  
49  
50 degree. The British journal of oral & maxillofacial surgery 2016;**54**(8):956-58 doi:  
51  
52 10.1016/j.bjoms.2016.06.006[published Online First: Epub Date] | .  
53  
54  
55  
56 17. Fitzgerald JE, Giddings CE, Khera G, Marron CD. Improving the future of surgical training  
57  
58  
59  
60

1  
2  
3 and education: consensus recommendations from the Association of Surgeons in Training.

4  
5 International journal of surgery (London, England) 2012;**10**(8):389-92 doi:

6  
7 10.1016/j.ijsu.2012.03.012[published Online First: Epub Date] |.

8  
9  
10 18. Orr K, Smith M. The financial burden of specialty training. BMJ Careers

11  
12 2016;**353**(8063):542

13  
14  
15 19. Costs of qualifying. Secondary Costs of qualifying 2017.

16  
17 <http://www.lawsociety.org.uk/law-careers/becoming-a-solicitor/costs-of-qualifying/>.

18  
19  
20 20. TargetJobs- Law. 2017.

21  
22  
23 21. Curtis L, Burns A. Unit costs of health and social care 2016: Personal social services  
24  
25 research unit, University of Kent, 2016.

26  
27  
28 22. Fitzgerald JE, Ravindra P, Lepore M, Armstrong A, Bhangu A, Maxwell-Armstrong CA.

29  
30  
31 Financial impact of surgical training on hospital economics: an income analysis of 1184 out-  
32  
33 patient clinic consultations. International journal of surgery (London, England)

34  
35 2013;**11**(5):378-82 doi: 10.1016/j.ijsu.2013.02.017[published Online First: Epub Date] |.

36  
37  
38 23. Clamp PJ, Malpas G, Mason KA, Giddings CE. Surgeons in training – a financial burden or  
39  
40 benefit to NHS trusts? Ann R Coll Surg Engl (Suppl) 2011;**93**:22-24

1  
2  
3  
4  
5  
6  
7  
8  
9  
10  
11  
12  
13  
14  
15  
16  
17  
18  
19  
20  
21  
22  
23  
24  
25  
26  
27  
28  
29  
30  
31  
32  
33  
34  
35  
36  
37  
38  
39  
40  
41  
42  
43  
44  
45  
46  
47  
48  
49  
50  
51  
52  
53  
54  
55  
56  
57  
58  
59  
60

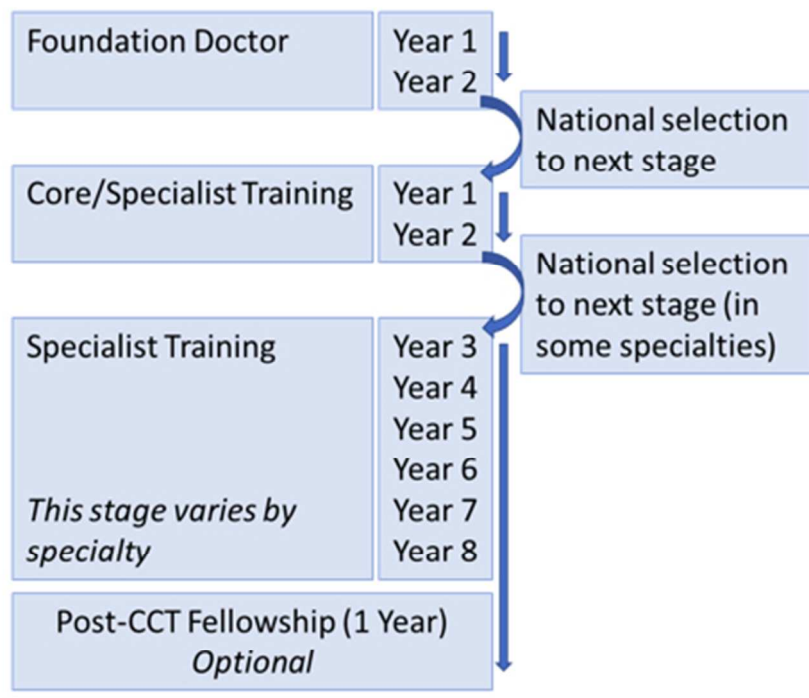

Figure 1. Stages and years of training for UK doctors training to be consultant surgeons. Foundation Doctor Year 1 is the first stage following graduation from university/medical school. In Ireland, the Intern Year is the equivalent of the Foundation Doctor stage in the UK.

185x142mm (72 x 72 DPI)

For peer review only

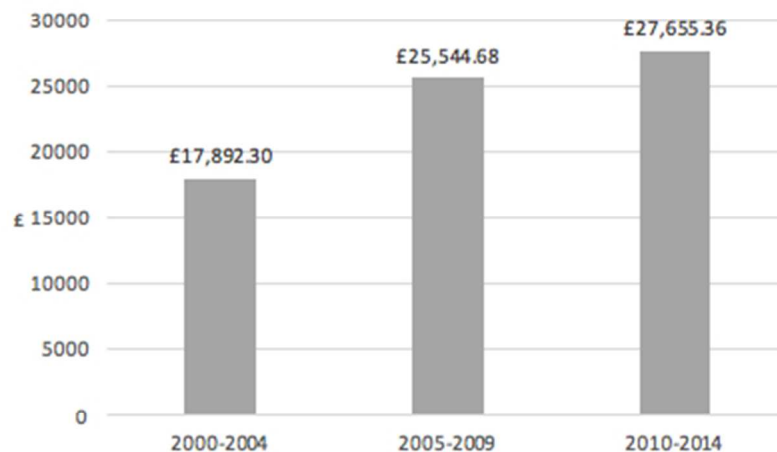

Figure 2. Mean debt on graduation from medical school, UK medical schools only. Debt has increased significantly comparing the most recent generation (graduation between 2010 and 2014) with the older generation (graduation between 2000 and 2004),  $p < 0.01$ .

176x104mm (72 x 72 DPI)

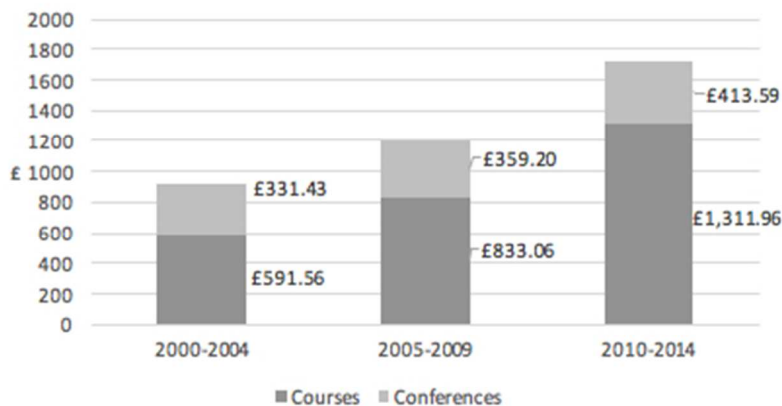

Figure 3. Mean expense per year on courses and conferences that trainees have not been reimbursed. Trainees grouped into 5- year generations by year of graduation. Expense on courses has increased significantly comparing the most recent generation (graduation between 2010 and 2014) with the older generation (graduation between 2000 and 2004),  $p < 0.01$ . Expense on conferences has not significantly increased ( $p = 0.28$ ). UK medical school graduates only.

181x89mm (72 x 72 DPI)

### Appendix One: Sources of Funding for Higher Surgical Trainees in Ireland

In Ireland, as the RCSI directly administers surgical training in Ireland, it receives funding from the HSE to provide surgical training. This includes covering the cost of the JCST fee and delivering the curriculum, including human factors and operative skills training days. However, other elements essential for CCT such as a leadership course, train the trainers course and good clinical practice are currently not directly provided. There are three funding streams available to trainees on higher specialist training, equivalent to the UK “study budget” - the current funding available to HST trainees are:

1. Mandatory Fund- this is provided by the HSE/NDTP and administered by RCSI. It provides funding of up to 1500 euros for approved mandatory courses while in full-time training in Ireland. This fund does not carry forward year on year and cannot be used if for example, on an overseas fellowship. However, its scope is limited as only approved mandatory courses are funded (1).
2. Specialist training fund- this is a fund of 500 euros per year, which accumulates over the course of HST. It can be used for course fees, equipment costs and books etc. It excludes time spent out of full time training, e.g. on an overseas fellowship (1).
3. There is an additional clinical courses and exams fund, where trainees can claim 450 euros for exams or courses on a definitive list of those deemed relevant to the speciality. This includes a narrow list, for example Advanced Trauma Life Support (ATLS). For exams undertaken outside of Ireland, 650 may be claimed. This is directly administered by the HSE/MET (2). The fund will only cover the cost once per trainee per examination.

At the time of this survey, many trainees would have spent time prior to commencing HST completing courses to make themselves competitive to apply for HST at considerable personal cost. In addition, the range of courses covered by the above list currently excludes many courses undertaken by trainees in their surgical training.



1  
2  
3  
4  
5 It is worth noting that the fund does not adequately cover the cost of courses. For example, the clinical course and examination refund scheme will cover  
6  
7 ATLS if undertaken in Ireland. The current cost of ATLS is 875 euros, but the scheme will only cover 450 euros. This does not include travel and  
8  
9 accommodation costs to regional centres to complete the course. Similarly, for membership and intercollegiate examinations, this fund does not fully cover  
10  
11 the cost, and as these are often held in the UK there are additional travel and accommodation expenses.  
12  
13

14  
15 References Appendix 1:  
16

- 17  
18 1. RCSI Training Funds for SpR Trainees. [http://rcsi.ie/files/surgery/docs/20161019040654\\_Funding-Information-2016.pdf](http://rcsi.ie/files/surgery/docs/20161019040654_Funding-Information-2016.pdf) Accessed 16th January 2017  
19
- 20  
21 2. HSE-National Doctors Training and Planning. Specialist Training Fund Guidance Document. July 2016.  
22  
23  
24  
25  
26  
27  
28  
29  
30  
31  
32  
33  
34  
35  
36  
37  
38  
39  
40  
41  
42  
43  
44  
45

### Appendix Two: Results for military trainees

There were 20 military trainee respondents. All 20 graduated from medical school in the UK: 19 (90%) graduated with debt on graduation (mean £18,650). 16 (80%) had a military grant at medical school, 10 (50%) had a government student loan and 4 (20%) had a bank or other loan. The mean amount paid out, that was not reimbursed, for courses was £4250, for conferences £1643, and £2130 for exams. Mean costs per year included surgical royal college subscription (£317), specialty society membership (£336), journals (£79), text books (£245). 7 had completed an MSc (35%), 5 an MD (25%) and 1 (5%) had done both since graduating from medical school (mean cost £12822).

| Which specialty do you intend to pursue? | What is your stage of training? |
|------------------------------------------|---------------------------------|
| General Surgery: 6 (30%)                 | Foundation Year 1: 1 (5%)       |
| Trauma and Orthopaedics: 6 (30%)         | Foundation Year 2: 0 (0%)       |
| Vascular Surgery: 2 (10%)                | ST1/CT1/SHO1: 4 (20%)           |
|                                          | ST2/CT2/SHO2: 2 (10%)           |
|                                          | ST3/SPR1: 1 (5%)                |
|                                          | ST4/SPR2: 4 (20%)               |
|                                          | ST5/SPR3: 2 (10%)               |
|                                          | ST6/SPR4: 1 (5%)                |
|                                          | ST7/SPR5: 1 (5%)                |
|                                          | ST8/SPR6: 1 (5%)                |
|                                          | Post CCT: 1 (5%)                |
|                                          | Research Post: 2 (10%)          |

| Demographic                  | Military Trainees  |
|------------------------------|--------------------|
| <b>Number</b>                | 20                 |
| <b>Male: Female (%)</b>      | 14:6 (70:30%)      |
| <b>Mean Age (years)</b>      | 33.8 (range 27-41) |
| <b>LTFT Trainees (%)</b>     | 0 (0)              |
| <b>Academic Trainees (%)</b> | 1 (5%)             |

1  
2  
3  
4  
5  
6  
7  
8  
9  
10  
11  
12  
13  
14  
15  
16  
17  
18  
19  
20  
21  
22  
23  
24  
25  
26  
27  
28  
29  
30  
31  
32  
33  
34  
35  
36  
37  
38  
39  
40  
41  
42  
43  
44  
45  
46  
47  
48  
49

**Appendix Three: Tables of costs to the trainee in each surgical specialty**

Using the published requirements for progression through surgical training we have provided an estimated breakdown of the costs to the trainee in each surgical specialty. The following tables of costs assume straight progression through F1-ST8 without taking time out for LTFT, post-graduate degrees or other career breaks. These prices are correct as of November 2016. July 2016 CCT guidance used as per JCST website. Conference costs do not include travel or subsistence. BMA= British Medical Association, CCT= Certificate of Completion of Training, CST= Core Surgical Trainee, CT= Core Training (year), FP=Foundation Programme, FRCS= Fellowship of the Royal College of Surgeons, GMC= General Medical Council, HST=Higher Surgical Trainee, JCST= Joint Committee on Surgical Training, MRCS= Membership of the Royal College of Surgeons, RCS= Surgical Royal College, RCSEng= Royal College of Surgeons of England, RCPSCG= Royal College of Physicians and Surgeons of Glasgow, ST= Specialty Trainee (year).

**Cardiothoracic Surgery**

| Requirements                                                                                                                                                                                                                                                                                                                                                                                          | Cost                                                                                                                                                                                                                                       |
|-------------------------------------------------------------------------------------------------------------------------------------------------------------------------------------------------------------------------------------------------------------------------------------------------------------------------------------------------------------------------------------------------------|--------------------------------------------------------------------------------------------------------------------------------------------------------------------------------------------------------------------------------------------|
| <i>Essential for Surgical Training</i><br>JCST fee (for 8 years)<br>GMC registration (for 10 years)                                                                                                                                                                                                                                                                                                   | £255 per year of surgical training<br>£200 for FP1 year, £425 per year for FP2+                                                                                                                                                            |
| <i>Mandatory for progression to ST3</i><br>MRCS examination                                                                                                                                                                                                                                                                                                                                           | £1425                                                                                                                                                                                                                                      |
| <i>Desirable for progression to ST3</i><br>RCSEng Basic Surgical Skills Course (BSS)<br>Advanced Trauma Life Support Course (ATLS)<br>RCSEng Care of the Critically Ill Surgical Patient Course (CCrISP)<br>RCSEng Specialty Skills in Cardiothoracic Surgery Course                                                                                                                                  | £670.50<br>£710<br>£724<br>£774                                                                                                                                                                                                            |
| <i>Mandatory for CCT</i><br>FRCS examination (including completion fee)<br>Good Clinical Practice Course<br>NHS Management Course e.g. BMA management essentials<br>Training and Education Course e.g. RCSEng Training the Trainers<br>National or international conference attendance each year of training e.g. Society for Cardiothoracic Surgery conference booked as early bird rate as a member | £2269<br>Free<br>£354<br>£702<br>£205 per year for 2 years as CST, £305 per year for 6 years as HST                                                                                                                                        |
| <i>Other</i><br>BMA Membership (for 10 years)<br><br>RCS subscription fees e.g. RCSEng if complete MRCS at CT2 and FRCS as ST8<br><br>Specialty Association Membership e.g. Society for Cardiothoracic Surgery<br><br>Healthcare Protection Organisation (for 10 years) e.g. Medical Defence Union                                                                                                    | £113 for FP1 year, £222 per year for FP2-CT2, £329 per year for ST3-5, £443 per year ST6+<br>£316 per year for 5 years as member, £531 for 1 year as fellow<br>£100 per year for 2 years as CST, £200 per year for 6 years as HST<br>£1800 |
| <b>TOTAL ESTIMATE</b>                                                                                                                                                                                                                                                                                                                                                                                 | <b>£24039.00</b>                                                                                                                                                                                                                           |

**General Surgery**

| Requirements                                                                                                                                                                                                                                                                                                                                                                                                                                                                                                                                                           | Cost                                                                                      |
|------------------------------------------------------------------------------------------------------------------------------------------------------------------------------------------------------------------------------------------------------------------------------------------------------------------------------------------------------------------------------------------------------------------------------------------------------------------------------------------------------------------------------------------------------------------------|-------------------------------------------------------------------------------------------|
| <i>Essential for Surgical Training</i><br>JCST fee (for 8 years)<br>GMC registration (for 10 years)                                                                                                                                                                                                                                                                                                                                                                                                                                                                    | £255 per year of surgical training<br>£200 for FP1 year, £425 per year for FP2+           |
| <i>Mandatory for progression to ST3</i><br>MRCS examination<br>RCSEng Basic Surgical Skills Course (BSS)<br>Advanced Trauma Life Support Course (ATLS)<br>RCSEng Care of the Critically Ill Surgical Patient Course (CCriSP)                                                                                                                                                                                                                                                                                                                                           | £1425<br>£670.50<br>£650<br>£724                                                          |
| <i>Mandatory for CCT</i><br>FRCS examination (and completion fee)<br>Good Clinical Practice Course<br>NHS Management Course e.g. BMA management essentials<br>Training and Education Course e.g. RCSEng Training the Trainers<br>Course relevant to specialist interest e.g. RCSEng specialty skills in coloproctology<br>ATLS revalidation to keep valid at time of certification<br>Attendance at 4 national or international conferences during training e.g. Association of Surgeons of Great Britain and Ireland conference booked as early bird rate as a member | £2269<br>Free<br>£354<br>£702<br>£585<br>£350<br>£260 per year for 4 years                |
| <i>Other</i><br>BMA Membership (for 10 years)                                                                                                                                                                                                                                                                                                                                                                                                                                                                                                                          | £113 for FP1 year, £222 per year for FP2-CT2, £329 per year for ST3-5, £443 per year ST6+ |
| RCS subscription fees e.g. RCSEng if complete MRCS at CT2 and FRCS as ST8                                                                                                                                                                                                                                                                                                                                                                                                                                                                                              | £316 per year for 5 years as member, £531 for 1 year as fellow                            |
| Specialty Association Membership e.g. Association of Surgeons of Great Britain and Ireland                                                                                                                                                                                                                                                                                                                                                                                                                                                                             | £81 per year for 8 years                                                                  |
| Healthcare Protection Organisation (for 10 years) e.g. Medical Defence Union                                                                                                                                                                                                                                                                                                                                                                                                                                                                                           | £1800                                                                                     |
| <b>TOTAL ESTIMATE</b>                                                                                                                                                                                                                                                                                                                                                                                                                                                                                                                                                  | <b>£22488.50</b>                                                                          |

**Neurosurgery**

| Requirements                                                                                                                                                                                                                                                                                                                                                                                                                                                                                                                  | Cost                                                                                                                                                                                                      |
|-------------------------------------------------------------------------------------------------------------------------------------------------------------------------------------------------------------------------------------------------------------------------------------------------------------------------------------------------------------------------------------------------------------------------------------------------------------------------------------------------------------------------------|-----------------------------------------------------------------------------------------------------------------------------------------------------------------------------------------------------------|
| <i>Essential for Surgical Training</i><br>JCST fee (for 8 years)<br>GMC registration (for 10 years)                                                                                                                                                                                                                                                                                                                                                                                                                           | £255 per year of surgical training<br>£200 for FP1 year, £425 per year for FP2+                                                                                                                           |
| <i>Mandatory for progression to ST3</i><br>MRCS examination                                                                                                                                                                                                                                                                                                                                                                                                                                                                   | £1425.00                                                                                                                                                                                                  |
| <i>Desirable for progression to ST3</i><br>RCSEng Basic Surgical Skills Course (BSS)<br>Advanced Trauma Life Support Course (ATLS)<br>RCSEng Care of the Critically Ill Surgical Patient Course (CCrISP)                                                                                                                                                                                                                                                                                                                      | £670.50<br>£650.00<br>£724.00                                                                                                                                                                             |
| <i>Mandatory for CCT</i><br>FRCS examination (including completion fee)<br>Good Clinical Practice Course<br>Research Methodology Course<br>NHS Management Course e.g. BMA management essentials<br>Training and Education Course e.g. RCSEng Training the Trainers<br>Advanced Trauma Life Support Course (ATLS) completed during training<br>Attendance at 4 national or international conferences during training e.g. Society of British Neurological Surgeons conference booked as early bird rate as an affiliate member | £2269.00<br>Free<br>Free<br>£354.00<br>£702.00<br>included above<br>£150 per year for 4 years                                                                                                             |
| <i>Other</i><br>BMA Membership (for 10 years)<br><br>RCS subscription fees e.g. RCSEng if complete MRCS at CT2 and FRCS as ST8<br><br>Specialty Association Membership e.g. Society of British Neurological Surgeons<br>Healthcare Protection Organisation (for 10 years) e.g. Medical Defence Union                                                                                                                                                                                                                          | £113 for FP1 year, £222 per year for FP2-CT2, £329 per year for ST3-5, £443 per year ST6+<br><br>£316 per year for 5 years as member, £531 for 1 year as fellow<br><br>£145 per year for 8 years<br>£1800 |
| <b>TOTAL ESTIMATE</b>                                                                                                                                                                                                                                                                                                                                                                                                                                                                                                         | <b>£21625.50</b>                                                                                                                                                                                          |

## Oral and Maxillofacial Surgery

| Requirements                                                                                                  | Cost                                      |
|---------------------------------------------------------------------------------------------------------------|-------------------------------------------|
| <i>Essential for Surgical Training</i>                                                                        |                                           |
| Bachelor of Dental Surgery e.g. University of Liverpool BDS graduate entry                                    | £9000 for 4 years                         |
| JCST fee (for 7 years)                                                                                        | £255 per year of surgical training        |
| GMC registration (for 9 years)                                                                                | £200 for FP1 year, £425 per year for FP2+ |
| GDC registration (for 9 years)                                                                                | £890 per year                             |
| <i>Mandatory for progression to ST3</i>                                                                       |                                           |
| MRCs examination                                                                                              | £1425                                     |
| <i>Desirable for progression to ST3</i>                                                                       |                                           |
| Advanced Trauma Life Support Course (ATLS)                                                                    | £650                                      |
| RCSEng Care of the Critically Ill Surgical Patient Course (CCrISP)                                            | £724                                      |
| Acute Life-threatening Events Recognition and Treatment (ALERT) Course                                        | £95                                       |
| <i>Mandatory for CCT</i>                                                                                      |                                           |
| FRCS examination (including completion fee)                                                                   | £2269                                     |
| Good Clinical Practice Course                                                                                 | Free                                      |
| Research Methodology Course                                                                                   | Free                                      |
| NHS Management Course e.g. BMA management essentials                                                          | £354                                      |
| Training and Education Course e.g. RCSEng Training the Trainers                                               | £702                                      |
| ATLS revalidation to keep valid at time of certification                                                      | £350                                      |
| Emergency Skills Course e.g. RCSEng Emergency Skills in Oral and Maxillofacial Surgery                        | £877.50                                   |
| Basic Plating Course e.g. AO basic OMFS plating course                                                        | £499                                      |
| Head and Neck Anatomy Course e.g. RCSEng basic surgical anatomy of the head and neck                          | £414                                      |
| Surgical Dermatology Course e.g. RCSEd Facial aesthetics course                                               | £785                                      |
| Orthognathic Course e.g. 6 <sup>th</sup> biennial Glasgow course                                              | £495                                      |
| Microvascular Course e.g. University of Liverpool microvascular course                                        | £1400                                     |
| Complex/Advanced Trauma Course inc. condylar fractures and orbital access e.g. SORG course                    | £1500                                     |
| 3 advanced sub-specialty courses:                                                                             |                                           |
| e.g. Establishing a modern salivary gland practice                                                            | £1250                                     |
| e.g. Newcastle functional septorhinoplasty and facial plastics cadaveric course                               | £950                                      |
| e.g. Controversies in the management of head and neck cancer                                                  | £275                                      |
| National or international conference attendance e.g. BAOMS Conference booked as early bird rate as a member * | £200                                      |

|                                                                                              |                                                                                           |
|----------------------------------------------------------------------------------------------|-------------------------------------------------------------------------------------------|
| <i>Other</i>                                                                                 |                                                                                           |
| BMA Membership (for 9 years)                                                                 | £113 for FP1 year, £222 per year for FP2-CT2, £329 per year for ST3-5, £443 per year ST6+ |
| RCS subscription fees e.g. RCSEng if complete MRCS at CT2 and FRCS as ST7                    | £316 per year for 4 years as member, £531 for 1 year as fellow                            |
| Specialty Association Membership e.g. British Association of Oral and Maxillofacial Surgeons | £85 per year for 7 years                                                                  |
| Healthcare Protection Organisation (for 9 years) e.g. Medical Defence Union                  | £1325                                                                                     |
| <b>TOTAL ESTIMATE</b>                                                                        | <b>£71431.50</b>                                                                          |

\* Where no minimum number of attendances documented a minimum of 1 included



**Otolaryngology**

| <b>Requirements</b>                                                                               | <b>Cost</b>                                                                               |
|---------------------------------------------------------------------------------------------------|-------------------------------------------------------------------------------------------|
| <i>Essential for Surgical Training</i>                                                            |                                                                                           |
| JCST fee (for 8 years)                                                                            | £255 per year of surgical training                                                        |
| GMC registration (for 10 years)                                                                   | £200 for FP1 year, £425 per year for FP2+                                                 |
| <i>Mandatory for progression to ST3</i>                                                           |                                                                                           |
| Diploma of Otolaryngology Head and Neck Surgery (DO-HNS)                                          | £932.00                                                                                   |
| <i>Desirable for progression to ST3</i>                                                           |                                                                                           |
| RCSEng Basic Surgical Skills Course (BSS)                                                         | £670.50                                                                                   |
| Advanced Trauma Life Support Course (ATLS)                                                        | £650                                                                                      |
| RCSEng Care of the Critically Ill Surgical Patient Course (CCrISP)                                | £724                                                                                      |
| Advanced Life Support Course                                                                      | £550                                                                                      |
| Advanced Paediatric Life Support Course and 2 x ENT courses                                       | see below                                                                                 |
| <i>Mandatory for CCT</i>                                                                          |                                                                                           |
| FRCS examination (including completion fee)                                                       | £2269                                                                                     |
| Good Clinical Practice Course                                                                     | Free                                                                                      |
| Research Methodology Course                                                                       | Free                                                                                      |
| Training and Education Course e.g. RCSEng Training the Trainers                                   | £702                                                                                      |
| Temporal Bone Dissection Course e.g. Cuschieri Skills Course                                      | £225                                                                                      |
| Sinus Anatomy and Surgical Dissection Course e.g. Cuschieri Skills Course                         | £275                                                                                      |
| Head and Neck Surgery Course (including LASER) e.g. RCSEd Head and Neck Course Module 1 and 2     | £850 and £1050                                                                            |
| Septorhinoplasty and Facial Plastics Surgery Course e.g. NSTC Course                              | £350                                                                                      |
| Advanced Paediatric Life Support Course                                                           | £395                                                                                      |
| National or international conference attendance e.g. BACO Conference booked as an ENT-UK member * | £825                                                                                      |
| <i>Other</i>                                                                                      |                                                                                           |
| BMA Membership (for 10 years)                                                                     | £113 for FP1 year, £222 per year for FP2-CT2, £329 per year for ST3-5, £443 per year ST6+ |
| RCS subscription fees e.g. RCSEng if complete MRCS at CT2 and FRCS as ST8                         | £316 per year for 5 years as member, £531 for 1 year as fellow                            |
| Specialty Association Membership e.g. ENT-UK                                                      | £210 per year for 8 years                                                                 |
| Healthcare Protection Organisation (for 10 years) e.g. Medical Defence Union                      | £1800                                                                                     |
| <b>TOTAL ESTIMATE</b>                                                                             | <b>£25218.50</b>                                                                          |

1  
2  
3  
4  
5  
6  
7  
8  
9  
10  
11  
12  
13  
14  
15  
16  
17  
18  
19  
20  
21  
22  
23  
24  
25  
26  
27  
28  
29  
30  
31  
32  
33  
34  
35  
36  
37  
38  
39  
40  
41  
42  
43  
44  
45  
46  
47  
48  
49

\* Where no minimum number of attendances documented a minimum of 1 included

For peer review only

1  
2  
3  
4  
5  
6  
7  
8  
9  
10  
11  
12  
13  
14  
15  
16  
17  
18  
19  
20  
21  
22  
23  
24  
25  
26  
27  
28  
29  
30  
31  
32  
33  
34  
35  
36  
37  
38  
39  
40  
41  
42  
43  
44  
45  
46  
47  
48  
49**Paediatric Surgery**

| Requirements                                                                                                                                                                                                                                                                                                                                                                                                                                                                         | Cost                                                                                                                                                                                                      |
|--------------------------------------------------------------------------------------------------------------------------------------------------------------------------------------------------------------------------------------------------------------------------------------------------------------------------------------------------------------------------------------------------------------------------------------------------------------------------------------|-----------------------------------------------------------------------------------------------------------------------------------------------------------------------------------------------------------|
| <i>Essential for Surgical Training</i><br>JCST fee (for 8 years)<br>GMC registration (for 10 years)                                                                                                                                                                                                                                                                                                                                                                                  | £255 per year of surgical training<br>£200 for FP1 year, £425 per year for FP2+                                                                                                                           |
| <i>Mandatory for progression to ST3</i><br>MRCS examination<br>Advanced Paediatric Life Support Course                                                                                                                                                                                                                                                                                                                                                                               | £1425<br>£395                                                                                                                                                                                             |
| <i>Desirable for progression to ST3</i><br>RCSEng Basic Surgical Skills Course (BSS)<br>Advanced Trauma Life Support Course (ATLS)<br>RCSEng Care of the Critically Ill Surgical Patient Course (CCrISP)                                                                                                                                                                                                                                                                             | £670.50<br>£650<br>£724                                                                                                                                                                                   |
| <i>Mandatory for CCT</i><br>FRCS examination (including completion fee)<br>Good Clinical Practice Course<br>Research Methodology Course<br>NHS Management Course e.g. BMA management essentials<br>Training and Education Course e.g. RCSEng Training the Trainers<br>ATLS revalidation to keep valid at time of certification<br>National or international conference attendance e.g. British Association of Paediatric Surgeons conference booked as early bird rate as a member * | £2269<br>Free<br>Free<br>£354<br>£702<br>£350<br>£150                                                                                                                                                     |
| <i>Other</i><br>BMA Membership (for 10 years)<br><br>RCS subscription fees e.g. RCSEng if complete MRCS at CT2 and FRCS as ST8<br><br>Specialty Association Membership e.g. British Association of Paediatric Surgeons<br>Healthcare Protection Organisation (for 10 years) e.g. Medical Defence Union                                                                                                                                                                               | £113 for FP1 year, £222 per year for FP2-CT2, £329 per year for ST3-5, £443 per year ST6+<br><br>£316 per year for 5 years as member, £531 for 1 year as fellow<br><br>£110 per year for 8 years<br>£1800 |
| <b>TOTAL ESTIMATE</b>                                                                                                                                                                                                                                                                                                                                                                                                                                                                | <b>£21640.50</b>                                                                                                                                                                                          |

\* Where no minimum number of attendances documented a minimum of 1 included

**Plastic Surgery**

| Requirements                                                                                                                                                                                                                                                                       | Cost                                                                                      |
|------------------------------------------------------------------------------------------------------------------------------------------------------------------------------------------------------------------------------------------------------------------------------------|-------------------------------------------------------------------------------------------|
| <i>Essential for Surgical Training</i><br>JCST fee (for 8 years)<br>GMC registration (for 10 years)                                                                                                                                                                                | £255 per year of surgical training<br>£200 for FP1 year, £425 per year for FP2+           |
| <i>Mandatory for progression to ST3</i><br>MRCS examination                                                                                                                                                                                                                        | £1425                                                                                     |
| <i>Desirable for progression to ST3</i><br>RCSEng Basic Surgical Skills Course (BSS)<br>Advanced Trauma Life Support Course (ATLS)<br>RCSEng Care of the Critically Ill Surgical Patient Course (CCrISP)                                                                           | £670.50<br>£650<br>£724                                                                   |
| <i>Mandatory for CCT</i><br>FRCS examination (including completion fee)<br>Good Clinical Practice Course<br>Research Methodology Course<br>Training and Education Course e.g. RCSEng Training the Trainers<br>Advanced Trauma Life Support Course (ATLS) completed during training | £2269<br>Free<br>Free<br>£702<br>included above                                           |
| Other<br>BMA Membership (for 10 years)                                                                                                                                                                                                                                             | £113 for FP1 year, £222 per year for FP2-CT2, £329 per year for ST3-5, £443 per year ST6+ |
| RCS subscription fees e.g. RCSEng if complete MRCS at CT2 and FRCS as ST8                                                                                                                                                                                                          | £316 per year for 5 years as member, £531 for 1 year as fellow                            |
| Specialty Association Membership e.g. BAPRAS                                                                                                                                                                                                                                       | £150 per year for 7 years (first year membership free)                                    |
| Healthcare Protection Organisation (for 10 years) e.g. Medical Defence Union                                                                                                                                                                                                       | £1800                                                                                     |
| <b>TOTAL ESTIMATE</b>                                                                                                                                                                                                                                                              | <b>£20561.50</b>                                                                          |

## Trauma and Orthopaedic Surgery

| Requirements                                                                                                         | Cost                                                                                                                                         |
|----------------------------------------------------------------------------------------------------------------------|----------------------------------------------------------------------------------------------------------------------------------------------|
| <i>Essential for Surgical Training</i>                                                                               |                                                                                                                                              |
| JCST fee (for 8 years)                                                                                               | £255 per year of surgical training                                                                                                           |
| GMC registration (for 10 years)                                                                                      | £200 for FP1 year, £425 per year for FP2+                                                                                                    |
| <i>Mandatory for progression to ST3</i>                                                                              |                                                                                                                                              |
| MRCS examination                                                                                                     | £1425                                                                                                                                        |
| Advanced Trauma Life Support Course (ATLS)                                                                           | £650                                                                                                                                         |
| <i>Desirable for progression to ST3</i>                                                                              |                                                                                                                                              |
| RCSEng Basic Surgical Skills Course (BSS)                                                                            | £670.50                                                                                                                                      |
| RCSEng Care of the Critically Ill Surgical Patient Course (CCrISP)                                                   | £724                                                                                                                                         |
| Basic Course on Fracture Management e.g. RCPSCG principles of casting for orthopaedic trainees                       | £20                                                                                                                                          |
| <i>Mandatory for CCT</i>                                                                                             |                                                                                                                                              |
| FRCS examination (including completion fee)                                                                          | £2269                                                                                                                                        |
| Good Clinical Practice Course                                                                                        | Free                                                                                                                                         |
| Research Methodology Course                                                                                          | Free                                                                                                                                         |
| Training and Education Course e.g. RCSEng Training the Trainers                                                      | £702                                                                                                                                         |
| ATLS revalidation to keep valid at time of certification                                                             | £350                                                                                                                                         |
| National or international conference attendance e.g. British Orthopaedic Association conference booked as a member * | Free                                                                                                                                         |
| <i>Other</i>                                                                                                         |                                                                                                                                              |
| BMA Membership (for 10 years)                                                                                        | £113 for FP1 year, £222 per year for FP2-CT2, £329 per year for ST3-5, £443 per year ST6+                                                    |
| RCS subscription fees e.g. RCSEng if complete MRCS at CT2 and FRCS as ST8                                            | £316 per year for 5 years as member, £531 for 1 year as fellow                                                                               |
| Specialty Association Membership e.g. British Orthopaedic Association                                                | £152 per year for 2 years as CST, £166 per year for 2 years as ST3-4, £204 per year for 2 years as ST5-6, £240 per year for 2 years as ST7-8 |
| Healthcare Protection Organisation (for 10 years) e.g. Medical Defence Union                                         | £1800                                                                                                                                        |
| <b>TOTAL ESTIMATE</b>                                                                                                | <b>£21405.50</b>                                                                                                                             |

\* Where no minimum number of attendances documented a minimum of 1 included

## Urology

| Requirements                                                                                                                                                                    | Cost                                                                                      |
|---------------------------------------------------------------------------------------------------------------------------------------------------------------------------------|-------------------------------------------------------------------------------------------|
| <i>Essential for Surgical Training</i>                                                                                                                                          |                                                                                           |
| JCST fee (for 7 years)                                                                                                                                                          | £255 per year of surgical training                                                        |
| GMC registration (for 9 years)                                                                                                                                                  | £200 for FP1 year, £425 per year for FP2+                                                 |
| <i>Mandatory for progression to ST3</i>                                                                                                                                         |                                                                                           |
| MRCS examination                                                                                                                                                                | £1425                                                                                     |
| <i>Desirable for progression to ST3</i>                                                                                                                                         |                                                                                           |
| RCSEng Basic Surgical Skills Course (BSS)                                                                                                                                       | £670.50                                                                                   |
| Advanced Trauma Life Support Course (ATLS)                                                                                                                                      | £650                                                                                      |
| RCSEng Care of the Critically Ill Surgical Patient Course (CCrISP)                                                                                                              | £724                                                                                      |
| <i>Mandatory for CCT</i>                                                                                                                                                        |                                                                                           |
| FRCS examination (including completion fee)                                                                                                                                     | £2269                                                                                     |
| Good Clinical Practice Course                                                                                                                                                   | Free                                                                                      |
| Research Methodology Course                                                                                                                                                     | Free                                                                                      |
| NHS Management Course e.g. BMA management essentials                                                                                                                            | £354                                                                                      |
| Training and Education Course e.g. RCSEng Training the Trainers                                                                                                                 | £702                                                                                      |
| ATLS revalidation to keep valid at time of certification                                                                                                                        | £350                                                                                      |
| Urodynamics Course e.g. Belfast Training Academy Course                                                                                                                         | £187.50                                                                                   |
| Paediatric Urology Course e.g. BAPU Course                                                                                                                                      | £295                                                                                      |
| Spinal Injuries Course e.g. Princess Royal Spinal Unit Course                                                                                                                   | £450                                                                                      |
| Emergency Urology Course e.g. East of England Emergency Urology Course                                                                                                          | £65                                                                                       |
| Attendance at 1 national or international conference every 2 years of training e.g. British Association of Urological Surgeons Conference booked as early bird rate as a member | £100 per year for 3 years                                                                 |
| <i>Other</i>                                                                                                                                                                    |                                                                                           |
| BMA Membership (for 9 years)                                                                                                                                                    | £113 for FP1 year, £222 per year for FP2-CT2, £329 per year for ST3-5, £443 per year ST6+ |
| RCS subscription fees e.g. RCSEng if complete MRCS at CT2 and FRCS as ST7                                                                                                       | £316 per year for 4 years as member, £531 for 1 year as fellow                            |
| Specialty Association Membership e.g. British Association of Urological Surgeons                                                                                                | £160 per year for 7 years                                                                 |
| Healthcare Protection Organisation (for 9 years) e.g. Medical Defence Union                                                                                                     | £1325                                                                                     |
| <b>TOTAL ESTIMATE</b>                                                                                                                                                           | <b>£20719</b>                                                                             |

1  
2  
3  
4  
5  
6  
7  
8  
9  
10  
11  
12  
13  
14  
15  
16  
17  
18  
19  
20  
21  
22  
23  
24  
25  
26  
27  
28  
29  
30  
31  
32  
33  
34  
35  
36  
37  
38  
39  
40  
41  
42  
43  
44  
45  
46  
47  
48  
49**Vascular Surgery**

| Requirements                                                                                                                    | Cost                                                                                      |
|---------------------------------------------------------------------------------------------------------------------------------|-------------------------------------------------------------------------------------------|
| <i>Essential for Surgical Training</i>                                                                                          |                                                                                           |
| JCST fee (for 8 years)                                                                                                          | £255 per year of surgical training                                                        |
| GMC registration (for 10 years)                                                                                                 | £200 for FP1 year, £425 per year for FP2+                                                 |
| <i>Mandatory for progression to ST3</i>                                                                                         |                                                                                           |
| MRCS examination                                                                                                                | £1425                                                                                     |
| RCSEng Basic Surgical Skills Course (BSS)                                                                                       | £670.50                                                                                   |
| Advanced Trauma Life Support Course (ATLS)                                                                                      | £650                                                                                      |
| RCSEng Care of the Critically Ill Surgical Patient Course (CCrISP)                                                              | £724                                                                                      |
| <i>Mandatory for CCT</i>                                                                                                        |                                                                                           |
| FRCS examination (including completion fee)                                                                                     | £2269                                                                                     |
| Good Clinical Practice Course                                                                                                   | Free                                                                                      |
| Research Methodology Course                                                                                                     | Free                                                                                      |
| NHS Management Course e.g. BMA management essentials                                                                            | £354                                                                                      |
| Training and Education Course e.g. RCSEng Training the Trainers                                                                 | £702                                                                                      |
| ATLS revalidation to keep valid at time of certification                                                                        | £350                                                                                      |
| National or international conference attendance per year e.g. Vascular Society Conference booked as a member at early bird rate | £375 per year for 8 years                                                                 |
| <i>Other</i>                                                                                                                    |                                                                                           |
| BMA Membership (for 10 years)                                                                                                   | £113 for FP1 year, £222 per year for FP2-CT2, £329 per year for ST3-5, £443 per year ST6+ |
| RCS subscription fees e.g. RCSEng if complete MRCS at CT2 and FRCS as ST7                                                       | £316 per year for 5 years as member, £531 for 1 year as fellow                            |
| Specialty Association Membership e.g. Vascular Society                                                                          | £115 per year for 8 years                                                                 |
| Healthcare Protection Organisation (for 10 years) e.g. Medical Defence Union                                                    | £1800                                                                                     |
| <b>TOTAL ESTIMATE</b>                                                                                                           | <b>£24135.50</b>                                                                          |

# STROBE Statement for A CROSS-SECTIONAL STUDY OF THE FINANCIAL COST OF TRAINING TO THE SURGICAL TRAINEE

|                           | Item No | Recommendation                                                                                                                                                                                                                                                                                                                                                                                                                                                                                                  |
|---------------------------|---------|-----------------------------------------------------------------------------------------------------------------------------------------------------------------------------------------------------------------------------------------------------------------------------------------------------------------------------------------------------------------------------------------------------------------------------------------------------------------------------------------------------------------|
| <b>Title and abstract</b> | 1       | (a) Indicate the study's design with a commonly used term in the title or the abstract<br>PAGE 1<br><input type="checkbox"/>                                                                                                                                                                                                                                                                                                                                                                                    |
|                           |         | (b) Provide in the abstract an informative and balanced summary of what was done and what was found<br>PAGE 2-3<br><input type="checkbox"/>                                                                                                                                                                                                                                                                                                                                                                     |
| <b>Introduction</b>       |         |                                                                                                                                                                                                                                                                                                                                                                                                                                                                                                                 |
| Background/rationale      | 2       | Explain the scientific background and rationale for the investigation being reported<br>PAGE 5-6<br><input type="checkbox"/>                                                                                                                                                                                                                                                                                                                                                                                    |
| Objectives                | 3       | State specific objectives, including any prespecified hypotheses<br>PAGE 6<br><input type="checkbox"/>                                                                                                                                                                                                                                                                                                                                                                                                          |
| <b>Methods</b>            |         |                                                                                                                                                                                                                                                                                                                                                                                                                                                                                                                 |
| Study design              | 4       | Present key elements of study design early in the paper<br>PAGE 7-10<br><input type="checkbox"/>                                                                                                                                                                                                                                                                                                                                                                                                                |
| Setting                   | 5       | Describe the setting, locations, and relevant dates, including periods of recruitment, exposure, follow-up, and data collection<br>PAGE 7-10<br><input type="checkbox"/>                                                                                                                                                                                                                                                                                                                                        |
| Participants              | 6       | (a) <i>Cohort study</i> —Give the eligibility criteria, and the sources and methods of selection of participants. Describe methods of follow-up<br><i>Case-control study</i> —Give the eligibility criteria, and the sources and methods of case ascertainment and control selection. Give the rationale for the choice of cases and controls<br><i>Cross-sectional study</i> —Give the eligibility criteria, and the sources and methods of selection of participants<br>PAGE 7-10<br><input type="checkbox"/> |
|                           |         | (b) <i>Cohort study</i> —For matched studies, give matching criteria and number of exposed and unexposed<br><i>Case-control study</i> —For matched studies, give matching criteria and the number of controls per case                                                                                                                                                                                                                                                                                          |
| Variables                 | 7       | Clearly define all outcomes, exposures, predictors, potential confounders, and effect modifiers. Give diagnostic criteria, if applicable                                                                                                                                                                                                                                                                                                                                                                        |



|                              |    |                                                                                                                                                                                                                                                                                                                                                                                                                                                                                                                                                                                                                                    |
|------------------------------|----|------------------------------------------------------------------------------------------------------------------------------------------------------------------------------------------------------------------------------------------------------------------------------------------------------------------------------------------------------------------------------------------------------------------------------------------------------------------------------------------------------------------------------------------------------------------------------------------------------------------------------------|
|                              |    | PAGE 7-10<br>□                                                                                                                                                                                                                                                                                                                                                                                                                                                                                                                                                                                                                     |
| Data sources/<br>measurement | 8* | For each variable of interest, give sources of data and details of methods of assessment (measurement). Describe comparability of assessment methods if there is more than one group                                                                                                                                                                                                                                                                                                                                                                                                                                               |
| Bias                         | 9  | Describe any efforts to address potential sources of bias<br>PAGE 4, 7-10<br>□                                                                                                                                                                                                                                                                                                                                                                                                                                                                                                                                                     |
| Study size                   | 10 | Explain how the study size was arrived at<br>PAGE 10<br>□                                                                                                                                                                                                                                                                                                                                                                                                                                                                                                                                                                          |
| Quantitative variables       | 11 | Explain how quantitative variables were handled in the analyses. If applicable, describe which groupings were chosen and why<br>PAGE 7-10<br>□                                                                                                                                                                                                                                                                                                                                                                                                                                                                                     |
| Statistical methods          | 12 | (a) Describe all statistical methods, including those used to control for confounding<br>PAGE 10<br>□<br>(b) Describe any methods used to examine subgroups and interactions<br>PAGE 10<br>□<br>(c) Explain how missing data were addressed<br>PAGE 9<br>□<br>(d) <i>Cohort study</i> —If applicable, explain how loss to follow-up was addressed<br><i>Case-control study</i> —If applicable, explain how matching of cases and controls was addressed<br><i>Cross-sectional study</i> —If applicable, describe analytical methods taking account of sampling strategy<br>PAGE 7-10<br>□<br>(e) Describe any sensitivity analyses |

Continued on next page

**Results**

|                   |     |                                                                                                                                                                                                                                                                                                                             |
|-------------------|-----|-----------------------------------------------------------------------------------------------------------------------------------------------------------------------------------------------------------------------------------------------------------------------------------------------------------------------------|
| Participants      | 13* | (a) Report numbers of individuals at each stage of study—eg numbers potentially eligible, examined for eligibility, confirmed eligible, included in the study, completing follow-up, and analysed<br>PAGE 10-12<br><input type="checkbox"/>                                                                                 |
|                   |     | (b) Give reasons for non-participation at each stage<br>PAGE 10-12<br><input type="checkbox"/>                                                                                                                                                                                                                              |
|                   |     | (c) Consider use of a flow diagram N/A                                                                                                                                                                                                                                                                                      |
| Descriptive data  | 14* | (a) Give characteristics of study participants (eg demographic, clinical, social) and information on exposures and potential confounders<br>PAGE 10-12<br><input type="checkbox"/>                                                                                                                                          |
|                   |     | (b) Indicate number of participants with missing data for each variable of interest<br>PAGE 10-13<br><input type="checkbox"/>                                                                                                                                                                                               |
|                   |     | (c) <i>Cohort study</i> —Summarise follow-up time (eg, average and total amount)                                                                                                                                                                                                                                            |
| Outcome data      | 15* | <i>Cohort study</i> —Report numbers of outcome events or summary measures over time<br><i>Case-control study</i> —Report numbers in each exposure category, or summary measures of exposure<br><i>Cross-sectional study</i> —Report numbers of outcome events or summary measures<br>PAGE 10-13<br><input type="checkbox"/> |
| Main results      | 16  | (a) Give unadjusted estimates and, if applicable, confounder-adjusted estimates and their precision (eg, 95% confidence interval). Make clear which confounders were adjusted for and why they were included<br>PAGE 10-13<br><input type="checkbox"/>                                                                      |
|                   |     | (b) Report category boundaries when continuous variables were categorized<br>PAGE 10-13<br><input type="checkbox"/>                                                                                                                                                                                                         |
|                   |     | (c) If relevant, consider translating estimates of relative risk into absolute risk for a meaningful time period                                                                                                                                                                                                            |
| Other analyses    | 17  | Report other analyses done—eg analyses of subgroups and interactions, and sensitivity analyses                                                                                                                                                                                                                              |
| <b>Discussion</b> |     |                                                                                                                                                                                                                                                                                                                             |
| Key results       | 18  | Summarise key results with reference to study objectives<br>PAGE 14-18<br><input type="checkbox"/>                                                                                                                                                                                                                          |
| Limitations       | 19  | Discuss limitations of the study, taking into account sources of potential bias or imprecision. Discuss both direction and magnitude of any potential bias<br>PAGE 4<br><input type="checkbox"/>                                                                                                                            |
| Interpretation    | 20  | Give a cautious overall interpretation of results considering objectives, limitations, multiplicity of analyses, results from similar studies, and other relevant evidence                                                                                                                                                  |

1  
2  
3  
4  
5  
6  
7  
8  
9  
10  
11  
12  
13  
14  
15  
16  
17  
18  
19  
20  
21  
22  
23  
24  
25  
26  
27  
28  
29  
30  
31  
32  
33  
34  
35  
36  
37  
38  
39  
40  
41  
42  
43  
44  
45  
46  
47  
48  
49  
50  
51  
52  
53  
54  
55  
56  
57  
58  
59  
60

PAGE 14-18

□

---

|                  |    |                                                                       |
|------------------|----|-----------------------------------------------------------------------|
| Generalisability | 21 | Discuss the generalisability (external validity) of the study results |
|------------------|----|-----------------------------------------------------------------------|

PAGE 14-18

□

---

**Other information**

---

|         |    |                                                                                                                                                               |
|---------|----|---------------------------------------------------------------------------------------------------------------------------------------------------------------|
| Funding | 22 | Give the source of funding and the role of the funders for the present study and, if applicable, for the original study on which the present article is based |
|---------|----|---------------------------------------------------------------------------------------------------------------------------------------------------------------|

PAGE 19

□

\*Give information separately for cases and controls in case-control studies and, if applicable, for exposed and unexposed groups in cohort and cross-sectional studies.

**Note:** An Explanation and Elaboration article discusses each checklist item and gives methodological background and published examples of transparent reporting. The STROBE checklist is best used in conjunction with this article (freely available on the Web sites of PLoS Medicine at <http://www.plosmedicine.org/>, Annals of Internal Medicine at <http://www.annals.org/>, and Epidemiology at <http://www.epidem.com/>). Information on the STROBE Initiative is available at [www.strobe-statement.org](http://www.strobe-statement.org).

# BMJ Open

## A CROSS-SECTIONAL STUDY OF THE FINANCIAL COST OF TRAINING TO THE SURGICAL TRAINEE IN THE UK AND IRELAND

|                                 |                                                                                                                                                                                                                                                                                                                                                                                                       |
|---------------------------------|-------------------------------------------------------------------------------------------------------------------------------------------------------------------------------------------------------------------------------------------------------------------------------------------------------------------------------------------------------------------------------------------------------|
| Journal:                        | <i>BMJ Open</i>                                                                                                                                                                                                                                                                                                                                                                                       |
| Manuscript ID                   | bmjopen-2017-018086.R1                                                                                                                                                                                                                                                                                                                                                                                |
| Article Type:                   | Research                                                                                                                                                                                                                                                                                                                                                                                              |
| Date Submitted by the Author:   | 16-Aug-2017                                                                                                                                                                                                                                                                                                                                                                                           |
| Complete List of Authors:       | O'Callaghan, John; Association of Surgeons in Training<br>Mohan, Helen; Association of Surgeons in Training<br>Sharrock, Anna ; Association of Surgeons in Training<br>Gokani, Vimal; Association of Surgeons in Training<br>Fitzgerald, J; The Association of Surgeons in Training,<br>Williams, Adam; Association of Surgeons in Training<br>Harries, Rhiannon; Association of Surgeons in Training |
| <b>Primary Subject Heading</b>: | Medical education and training                                                                                                                                                                                                                                                                                                                                                                        |
| Secondary Subject Heading:      | Surgery                                                                                                                                                                                                                                                                                                                                                                                               |
| Keywords:                       | MEDICAL EDUCATION & TRAINING, SURGERY, HEALTH ECONOMICS, surgical training, cost of training, SURGICAL EDUCATION                                                                                                                                                                                                                                                                                      |
|                                 |                                                                                                                                                                                                                                                                                                                                                                                                       |

SCHOLARONE™  
Manuscripts

Only

1  
2  
3 A CROSS-SECTIONAL STUDY OF THE FINANCIAL COST OF TRAINING  
4  
5 TO THE SURGICAL TRAINEE IN THE UK AND IRELAND  
6  
7

8 John M O'Callaghan, Helen M Mohan, Anna E Sharrock, Vimal J Gokani, J Edward Fitzgerald,  
9

10 Adam P Williams, Rhiannon L Harries; on behalf of the Council of the Association of  
11 Surgeons in Training  
12  
13

14  
15 Corresponding author: Rhiannon.harries@doctors.org.uk  
16  
17

18  
19 Address: Association of Surgeons in Training, 35-43 Lincoln's Inn Fields, London WC2A 3PE  
20  
21

22  
23 <http://www.asit.org>  
24

25  
26 <http://twitter.com/ASiTofficial> @ASiTofficial,  
27  
28

29  
30 **Running head:** The cost of surgical training  
31

32  
33 **Category:** Original research  
34  
35

36  
37 **Funding:** Nil  
38  
39

40 **Keywords:** surgical training, cost of training, surgical education, medical  
41 education, health economics  
42  
43  
44

45  
46 **Word count:** 3809  
47  
48  
49  
50  
51  
52  
53  
54  
55  
56  
57  
58  
59  
60

**Abstract****Objectives:**

Applications for surgical training has declined over the last decade and anecdotally, the costs of training at the expense of the surgical trainee are rising. We aimed to quantify the costs surgical trainees are expected to cover for postgraduate training.

**Design:**

Prospective, cross-sectional questionnaire based study.

**Setting/Participants:**

A non-mandatory online questionnaire for UK-based trainees was distributed nationally. A similar national questionnaire was distributed for Ireland, taking into account differences between the healthcare systems. Only fully completed responses were included.

**Results:**

There were 848 and 58 fully completed responses from doctors based in the UK and Ireland, respectively. Medical students in the UK reported a significant increase in debt on graduation by 55% from £17,892 (2000-2004) to £27,655 (2010-2014),  $p < 0.01$ . 41% of specialty trainees in the UK indicated that some or all of their study budget was used to fund mandatory regional teaching. By the end of training, a surgical trainee in the UK spends on average £9,105 on courses, £5,411 on conferences and £4,185 on exams, not covered by training budget. Irish trainees report similarly high costs. Most trainees undertake a higher degree during their postgraduate training. The cost of achieving the mandatory requirements for completion of training ranges between £20,000-£26,000 (dependent on specialty), except oral and maxillofacial surgery, which is considerably higher (£71,431).

**Conclusions:**

Medical students are graduating with significantly larger debt than before. Surgical trainees achieve their educational requirements at substantial personal expenditure. To encourage graduates to pursue and remain in surgical training, urgent action is required to fund the mandatory requirements and annual training costs for completion of training and provide greater transparency to inform doctors of what their postgraduate training costs will be. This is necessary to increase diversity in surgery, reduce debt load and ensure surgery remains a popular career choice.

### Strengths and Limitations of this Study

- This national study provides a large cross-sectional data set on the experience of the costs of surgical training by surgical trainees across all ten surgical specialties in the UK and Ireland
- The costs analysed provided a comprehensive overview of the breadth and depth of financial costs incurred by trainees.
- The wide-distribution of the survey and breadth of responses increased the likelihood that it is representative of trainee experience.
- We recognise that there is a significant number of surveys excluded due to incompleteness, which we believe to be related to the need for accurate costings to complete the survey. However, the overall number of completed responses was higher than required to power the study.
- It is recognised that some costs could be subject to recall bias or an element of selection bias, in that those with significantly more debt may be more likely to respond, however the figures reported are largely consistent with the calculations we have made using the current prices of exams, courses and society memberships to verify the results.



## Introduction

The number of trainees applying for surgical training has declined over the last decade<sup>1</sup>.

Many factors including low workforce morale, poor work-life balance and recent contractual issues may act as a deterrent to medical students considering a career in surgery<sup>2</sup>. The cost of completing the mandatory postgraduate requirements to secure a higher surgical training programme post has been estimated to be between £2,735 and £20,780, dependent on surgical specialty (average £3,360) compared with medicine £2,815 and anaesthetics £2,215<sup>3</sup>. Following entry to higher surgical training, there are considerable ongoing costs incurred by trainees in order to meet the requirements for completion of training as mandated by the Joint Committee on Surgical Training (JCST). These include educational courses, conference attendance, Royal College membership and fellowship examinations and annual subscriptions, and specialty society membership subscriptions. In addition, trainees pay annual expenses such as registration with the respective regulatory bodies, the UK General Medical Council (GMC) or Irish Medical Council (IMC), medical indemnity insurance costs, and the JCST fee (paid by trainees in the UK).

In 2007, The Association of Surgeons in Training (ASiT) conducted a survey of UK surgical trainees, to assess the financial costs to trainees in surgical training<sup>4</sup>. The results demonstrated that the mean debt on qualification from medical school was over £20,000. However, in recent years there have been many new challenges facing the current generation of surgical trainees, including increased student debt, secondary to a rise in annual university tuition fees of up to £9,000 per annum<sup>5</sup>. It has previously been calculated that medical students graduating currently are unlikely to repay their student loan debt before reaching the 30-year point at which it is written off<sup>6</sup>. The salaries of male and female medical graduates diverge such that by the age of 55, the average male medical school

1  
2  
3 graduate earns 35% more<sup>6</sup>. This means that the average female graduate repays more when  
4  
5 debt is low, but a lower amount when debt is high, compared to male graduates<sup>6</sup>. The cost  
6  
7 of living has also increased; in the ten years, preceding November 2016 the UK Consumer  
8  
9 Price Index (CPI) rose a total of 23.8%<sup>7</sup>.

10  
11  
12  
13 To assess the current situation, we repeated a refined study, with a broader remit and more  
14  
15 in depth assessment of cost pressures on trainee surgeons in both the UK and Ireland. The  
16  
17 main aim was to assess the true financial cost of training to the surgical trainee in each of  
18  
19 the ten surgical specialties.  
20  
21  
22  
23  
24  
25  
26  
27  
28  
29  
30  
31  
32  
33  
34  
35  
36  
37  
38  
39  
40  
41  
42  
43  
44  
45  
46  
47  
48  
49  
50  
51  
52  
53  
54  
55  
56  
57  
58  
59  
60

## Methods

### Participants and setting

Postgraduate surgical training in the UK and Ireland consists of a minimum of 8 years of training (except for oral and maxillofacial surgery (OMFS) and urology which is a minimum of 7 years) following completion of the initial post-qualification two-year Foundation Programme (or intern year in Ireland) **Figure 1**. Competitive entry occurs prior to both Core and Higher specialist training levels, except for neurosurgery, cardiothoracic surgery and Oral and maxillofacial surgery (OMFS) in the UK (and trauma and orthopaedics in Scotland), where 'run-through' training (no separate selection process between core and higher specialist training) from Core level exists. Core surgical knowledge is assessed by the Intercollegiate Membership of the Royal College of Surgeons (MRCS) examination and specialty specific knowledge during the later phase of higher surgical training is assessed by the Intercollegiate Fellowship of the Royal College of Surgeons (FRCS) examination.

In the UK and Ireland, the Joint Committee on Surgical Training (JCST) are responsible for curriculum development and quality assurance of all the surgical training programmes in the ten defined surgical specialities (cardiothoracic surgery, general surgery, neurosurgery, OMFS, otolaryngology, paediatric surgery, plastic surgery, trauma and orthopaedics, urology and vascular surgery). All surgical trainees are required to register with the JCST and to pay an annual fee (£255 at time of submission) that has more than doubled between 2010 and 2016. This fee supports the running costs of the JCST to manage trainee enrolment and recommendation for certification; the work of each of the ten surgical specialities 'Specialty Advisory Committee' (SACs); curriculum review and development and website support. The

1  
2  
3 JCST training fee is covered for trainees in Ireland directly by funding received by the RCSI  
4  
5 from the Health Service Executive (HSE).  
6  
7

8  
9 In the UK, Local Education Training Boards (LETBs) provide funding to Local Education  
10  
11 Providers (essentially the hospital where a trainee is employed) to cover the direct costs of  
12  
13 delivering education and training. This sum includes two components: firstly, salary support  
14  
15 of 50% of each doctor's basic salary; the second component is a placement fee of £12,400  
16  
17 per year, per trainee, to fund all costs involved in delivering education and training needs. It  
18  
19 is from this placement fee that trainees apply for study funding support towards courses  
20  
21 and conferences essential to their training, often referred to as 'study leave budget', with a  
22  
23 restricted amount available dependent on the LETB. Funding for military trainees in the UK  
24  
25 regular Defence Medical Services (DMS) is overseen by External Education and Training  
26  
27 Support (EETS) within the Defence Deanery. Funding for training courses for military  
28  
29 trainees is therefore at the discretion of the Defence Consultant Advisor and Defence  
30  
31 Deanery<sup>8</sup>. In Ireland, the RCSI receives funding from HSE to provide surgical training, which  
32  
33 covers the cost of the JCST fee, delivering the curriculum, human factors and operative skills  
34  
35 training days. However, other elements essential for CCT (Certificate of Completion of  
36  
37 Training) are not directly provided. More details of funding for Irish trainees is given in  
38  
39  
40  
41  
42  
43

#### 44 **Appendix 1.**

45  
46  
47 At the time of survey distribution, there were 5,323 surgical trainees in the UK and 438  
48  
49 surgical trainees in Ireland<sup>9</sup>.  
50  
51  
52  
53  
54  
55  
56  
57  
58  
59  
60

### Questionnaire design and distribution

A novel 54-item, survey tool was developed, consisting of free-text, binomial and variable scale responses. The questionnaire was designed with reference to previously published guidelines on conducting questionnaire research<sup>10-12</sup>. The online platform *SurveyMonkey*® (Palo Alto, CA, USA, [www.surveymonkey.com](http://www.surveymonkey.com)) was used to build the survey. All individual question items were compulsory. No individually identifiable information was collected; therefore, non-responders could not be identified for follow-up. No incentives were offered for participation. A link to the online survey was distributed to members of ASiT, surgical specialty associations, and local and national mailing lists of surgical trainees. All surgical trainees in the UK including foundation doctors were included, as appropriate to the level of analysis. A modified version of the survey was circulated to ASiT members and surgical trainees in Ireland, which reflected relevant differences in health systems and training. Interns were excluded from distribution of the survey in Ireland as contact details were only available for those registered as surgical trainees with RCSI. Data collection took place from 2<sup>nd</sup> December 2015 to 26<sup>th</sup> April 2016. The ethical dimensions of this non-mandatory, anonymous evaluation survey were considered and no concerns were identified. Participants consented to the use of the analysis, distribution and publication of anonymised grouped results. A copy of the survey can be found in **Appendix 2**.

This study was undertaken by ASiT (<http://www.asit.org>), a pan-surgical specialty professional body and registered charity in the UK (no: 274841) working to promote excellence in surgical training for the benefit of junior doctors and patients alike. ASiT is

1  
2  
3 independent of the National Health Service (NHS), Surgical Royal Colleges, and specialty  
4  
5 associations.  
6  
7

### 8 **Data analysis**

9  
10  
11 Only fully completed questionnaires were included in the analysis. Due to the differing  
12  
13 healthcare structures and funding systems of postgraduate education and training in UK and  
14  
15 Ireland, a modified version of the survey was used for Ireland and the results are presented  
16  
17 separately. Military trainees were excluded due to low numbers and a separate training  
18  
19 funding structure. Data was graphed and analysed in *Excel*<sup>®</sup> (Microsoft, USA). Significance  
20  
21 testing for continuous variables was conducted using Mann-Whitney U Test in *Stata*<sup>®</sup>  
22  
23 (Statacorp, USA); statistical significance was accepted at  $p < 0.05$ . Survey sample size  
24  
25 calculations were based on standard published formulae and assuming a population of 6000  
26  
27 individuals, with  $\alpha = 0.01$ , 209 responses would be sufficient for margin of error of 0.03<sup>13</sup>.  
28  
29 For readability, all values are presented to the nearest pound (£) or euro (€). We have used  
30  
31 the exchange rate as accessed on 13<sup>th</sup> January 2017 of £0.87= €1.00 to provide comparisons  
32  
33 between the two currencies<sup>14</sup>. The study results are reported in concordance with STROBE  
34  
35 guidance on observational studies<sup>15</sup>. Results regarding costs are presented displaying  
36  
37 trainees year of graduation in blocks of 5 years to show trends over time.  
38  
39  
40  
41  
42  
43  
44  
45

### 46 **Costs of CCT to the trainee in each surgical speciality**

47  
48  
49 Using guidance available from the JCST the total cost of achieving the mandatory and  
50  
51 desirable requirements for CCT in each of the surgical specialties was also calculated. Where  
52  
53 conference attendance was mandated, but no exact minimum number described, the cost  
54  
55 of at least one attendance during the training period was calculated. For courses which  
56  
57  
58  
59  
60

1  
2  
3 required re-validation at the end of training, the reduced course cost of re-validation rather  
4  
5 than a full attendance was used. Course costs from recognised bodies, such as the BMA and  
6  
7 Surgical Royal Colleges, were used in all calculations, where applicable. Conference costs  
8  
9 were calculated using the reduced rates available to society members or early registrations  
10  
11 where possible.  
12  
13  
14  
15  
16  
17  
18  
19  
20  
21  
22  
23  
24  
25  
26  
27  
28  
29  
30  
31  
32  
33  
34  
35  
36  
37  
38  
39  
40  
41  
42  
43  
44  
45  
46  
47  
48  
49  
50  
51  
52  
53  
54  
55  
56  
57  
58  
59  
60

For peer review only

## Results

Of 1603 surveys submitted, a total of 868 fully completed responses were included in the analysis from doctors based in the UK, and 58 fully completed responses from doctors based in the Republic of Ireland. Respondent demographics by country of work are detailed in

### Table 1.

#### United Kingdom-specific responses

For the purposes of monetary analysis UK military doctors (n=20) were excluded from the main analysis, however a summary of military doctors' survey findings can be found in **Appendix 3**. This resulted in a total of 848 respondents for analysis. Of 848 respondents, 751 (88%) graduated from medical school in the UK. 89% (672) of these UK medical school graduates graduated with debt, with a mean of £25,404. The average debt by year of graduation has increased by 55% from £17,892 to £27,655 comparing graduates in the most recent generation (2010-2014) with those graduating between 2000 and 2004 (p<0.01)

### Figure 2.

There were 659 specialty trainee respondents from the UK (grades CT/ST1 to ST8) **Table 2**. Of these, 93% (618) responded that they were currently entitled to a study leave budget. The median value was £600 per annum (range £500-£835). Three LETBs reported no defined budget limit (Yorkshire and Humber, South West and Thames Valley). 41% of all respondents in specialty training indicated that some (31% of respondents) or all (10% of respondents), of their study budget was used to fund mandatory regional teaching.

By the end of training, a surgical trainee in the UK can expect to have spent on average £9,105 on courses, £5,411 on conferences and £4,185 on exams (£18,701) that they have



1  
2  
3 not been reimbursed through any source. Expense per year on conferences has marginally  
4  
5 increased from £331 to £414 comparing older graduates with the more recent generation  
6  
7 (2000-2004 versus 2010-2014,  $p=0.28$ ). However, course expenses per year have increased  
8  
9 significantly; the most recent graduates from medical school, graduating in the years 2010-  
10  
11 2014, have spent on average £1,311 per year. This is an increase of 121% on the annual  
12  
13 amount spent by medical school graduates graduating between 2000 and 2004 ( $p<0.01$ )  
14  
15

16  
17 **Figure 3.**

18  
19  
20 400 respondents (47%) from the UK have undertaken a postgraduate degree since  
21  
22 graduating from medical school, with this proportion rising by the later stages of training  
23  
24 (ST7-8 and post-CCT fellow) to 68% (96/141). The average cost of the degree, including  
25  
26 university fees and loss of earnings was estimated by respondents at £18,009; with an  
27  
28 MD/PhD being the most popular higher degree completed (24.8%, mean cost £27,882),  
29  
30 followed by MSc (21.3%, mean cost £11,090).  
31  
32  
33

34  
35 732 respondents from the UK (86%) and 340 of 349 trainees level ST3-ST8 (97%) pay an  
36  
37 annual subscription to one of the four surgical royal colleges (mean £305 for all trainees,  
38  
39 mean £386 for ST3-ST8). 700 respondents (82%) pay annually to their SAC-defined specialty  
40  
41 society (mean £343) and 672 (79%) are members of the British Medical Association. Over  
42  
43 the last year, the mean amount spent on journals was £72 and on textbooks was £212.  
44  
45  
46  
47

48 **Ireland-specific responses**

49  
50 Of the 58 respondents, 57 were currently working in Ireland and one was on fellowship in  
51  
52 the USA **Table 1 and Table 3**. 25 (43%) reported that they were currently entitled to a  
53  
54 training fund **Appendix 1**. In the past year, trainees spent on average £1278 (€1469) on  
55  
56 mandatory courses, including travel expenses to courses, many of which are outside of  
57  
58  
59  
60

1  
2  
3 Ireland, of which a mean of £784 (€902) euros was not reimbursed. Trainees spent a mean  
4  
5 of £1,977 (€2,321) on non-mandatory courses, of which a mean of £1,850 (€2,164) was not  
6  
7 reimbursed. In the past year, respondents had spent a mean of £1,153 (€1,353) on  
8  
9 attending conferences, of which a mean £1,005 (€1,183) was not reimbursed. Since  
10  
11 graduation, across all grades trainees had spent a mean £4,829 (€5,669) on examinations, of  
12  
13 which a mean £3,402 (€4,004) was not reimbursed. For senior trainees (ST8), an average  
14  
15 £9,796 (€11,500) had been spent on exams, of which £5,396 (€6,351) was not reimbursed.  
16  
17

18  
19  
20 47 respondents (n=81%) from Ireland had undertaken a post-graduate degree since  
21  
22 graduating from medical school. The MCh was the most popular post-graduate degree  
23  
24 (n=15, 26%), followed by the MSc (n=13, 22%) and MD (n=11, 19%). The average estimated  
25  
26 total monetary cost of undertaking a postgraduate degree to the trainee, including course  
27  
28 fees and loss of income, was £22,093 (€25,936).  
29  
30  
31

### 32 33 **Estimated costs of training (UK and Ireland) using CCT essential and desirable criteria**

34  
35  
36 The costs range between £20,000 (€23,479) to £26,000 (€30,523) depending on surgical  
37  
38 specialty, except OMFS, which is considerably higher (£71,431 or €83,858) due to the dual  
39  
40 qualification in medicine and dentistry as well as having significantly more mandatory  
41  
42 training courses than other specialties **Appendix 4**.  
43  
44  
45

46  
47 Only the minority of the costs are tax deductible, add to this the estimated cost of a  
48  
49 postgraduate degree (£18,009 or €21,142), which many surgical trainees will also undertake  
50  
51 at their own expense, and the estimated costs to the trainee increase to approximately  
52  
53 £40,000 (€46,958, excluding OMFS).  
54  
55  
56  
57  
58  
59  
60

## Discussion

This study has shown that individual doctors incur many thousands of pounds in personal expense after graduating from medical school to pursue a career as a surgeon and to meet the requirements to complete surgical training. These costs are incurred in addition to the significant debt built up by most medical school graduates, a debt burden likely to rise further as a greater proportion of students graduate under increased student tuition fees in the UK. Many of the costs paid by the trainee towards their training are not recognised as tax deductible, yet are incurred to cover requirements that are essential to progress through training schemes, and therefore to maintain one's livelihood. Consultant surgeons-to-be now spend considerably more per year on courses than in the past, and these now represent the single largest training cost, according to our results. Efforts to make surgery an attractive and inclusive career must include an equitable distribution of training costs to the trainee.

Individual trainees spend significant amounts on courses that are not actually mandatory as documented in CCT requirements. We speculate there are two reasons for this; firstly, surgical trainees will undertake courses above and beyond the minimum requirements to develop their skills. Gaps in knowledge and experience delivered in current training posts are likely to contribute to this, such that simulation courses are necessary to address training needs. As such, issues with training programmes failing to meet trainee's educational needs are instead transferred to trainees, who still obtain this necessary training at their own cost. Secondly, to be competitive for higher surgical training and for consultant posts, trainees may undertake additional courses and extracurricular activities.

1  
2  
3 We have identified a regional variation in what amount is available to trainees, despite the  
4  
5 standardised placement fee from the LETB. Study budgets for specialty trainees were lower  
6  
7 than the values released in response to the recent FOI request by Varley *et al* in 7 out of 10  
8  
9 LETBs (North Central, South and North West London, North West England, East of England,  
10  
11 Kent Surrey and Sussex and North East England), and equal in three LETBs (East Midlands,  
12  
13 Wales, West Midlands)<sup>16</sup>. It is desirable that study budgets are standardised across the UK,  
14  
15 in both amount and that they should not be top-sliced to provide mandatory regional  
16  
17 teaching, and in the longer term all items deemed essential for CCT (including the JCST fee),  
18  
19 should be funded directly, without expense to the trainee. ASiT has previously highlighted  
20  
21 this issue of uncontrolled geographical variation, calling for an equitable approach through  
22  
23 national standardisation<sup>17</sup>.  
24  
25  
26  
27  
28

29  
30 Irish trainees bear similar high costs in surgical training to their UK counterparts, not  
31  
32 surprisingly given that JCST requirements are the same. The higher cost of courses for Irish  
33  
34 trainees may reflect increased travel and accommodation expenses, as many courses  
35  
36 require travel outside of Ireland and the exclusion of Irish interns from the study, who are  
37  
38 less likely to have undertaken expensive technical skills courses. The higher cost of exams  
39  
40 may reflect in part a higher proportion of Irish trainees who undertake USMLE examinations  
41  
42 to pursue a fellowship in the USA, as well as increased travel expenses to intercollegiate  
43  
44 examinations often held in the UK. While funding is available to reimburse some of these  
45  
46 expenses, it falls short of being sufficient to avoid trainees bearing the greatest burden of  
47  
48 the cost. These costs are on top of annual mandatory costs such as membership or  
49  
50 fellowship of RCSI. These are a significant additional cost- for example, the 2016/2017  
51  
52 subscription rate is £315 (€370) for fellows and £226 (€265) for members), and the annual  
53  
54  
55  
56  
57  
58  
59  
60

1  
2  
3 Irish Medical Council(IMC) retention fee (£477 (€560) for those registered for less than 3  
4  
5 years and £515 (€605) for those registered for more than 3 years). Of note, the payment for  
6  
7 the Irish Medical Council (IMC) is an annual payment and cannot be split across the year  
8  
9 which places a significant financial burden on trainees at the time of the year when they  
10  
11 move jobs and incur considerable additional expenses.  
12  
13

14  
15 68% of later stage higher surgical trainees in the UK and 81% of Irish trainees report  
16  
17 obtaining a higher degree. This was associated with an average cost estimated by  
18  
19 respondents of over £18,000 and £22,000 in the UK and Ireland, respectively. Whilst it is not  
20  
21 deemed mandatory by the JCST to undertake a higher degree within surgical training, there  
22  
23 are a number of reasons why surgical trainees choose to undertake one. Firstly, it is  
24  
25 required in order to practice as an academic consultant surgeon, and secondly, a significant  
26  
27 proportion of trainees will undertake one in order to make themselves competitive for  
28  
29 consultant appointment.  
30  
31  
32  
33

34  
35 Doctors need to be aware in advance of what their chosen pathway is likely to cost them,  
36  
37 alongside the starting salary for consultant posts when they complete their training (ranging  
38  
39 from £76,761 in the UK and £95,775 (€105,000) in Ireland<sup>18,19</sup>). This study has provided the  
40  
41 most detailed assessment yet for both UK and Irish surgical trainees. It is difficult to  
42  
43 compare the costs to other medical specialties as few similar studies have been undertaken  
44  
45 in other disciplines. One calculation for the training costs towards the completion of CCT in  
46  
47 Obstetrics and Gynaecology estimated slightly less than for surgical trainees, at £14,224<sup>20</sup>.  
48  
49 Another calculation for only the early stages of training in other specialties was also slightly  
50  
51 less for medicine and anaesthetics, than surgical specialties<sup>3</sup>. Comparisons to other  
52  
53 professional careers, such as solicitors, are also difficult, but working in the private sector  
54  
55  
56  
57  
58  
59  
60

1  
2  
3 has additional benefits. After qualifying with a law degree, solicitors must complete a Legal  
4  
5 Practice Course (LPC), which costs £8,500-£15,000 dependent on type of course and  
6  
7 location<sup>21</sup>. It is however possible to have this cost covered by a law firm if obtaining a  
8  
9 training contract in advance, and many law firms will also provide a living expense grant of  
10  
11 several thousand pounds per year<sup>22</sup>.

12  
13  
14  
15  
16 Research by the University of Kent for the Department of Health has provided cost-  
17  
18 estimates for the training of various doctor grades from the start of medical school  
19  
20 onwards<sup>23</sup>. This work found that the total cost of training a consultant was £564,112, with  
21  
22 some contributions that came largely from the individual (such as undergraduate university  
23  
24 fees, lost earnings, and postgraduate training fees) and others that came predominantly  
25  
26 from the state (clinical placement, tuition and replacement)<sup>23</sup>. It is not possible from the  
27  
28 document to disentangle the values independently contributed by each party.  
29  
30  
31

32  
33 An important consideration frequently overlooked in these analyses relates to the hospital  
34  
35 activity performed by trainees generating hospital income. Doctors in training have a value  
36  
37 as well as a cost, which should be taken into account to offset such cost-estimates. Two UK-  
38  
39 based studies have sought to quantify this within surgical training<sup>24,25</sup>. In general surgery, an  
40  
41 analysis of 1,184 out-patient clinic consultations demonstrated that trainees delivered a  
42  
43 quarter of all out-patient related income, averaging £36,452 per trainee<sup>24</sup>. This was  
44  
45 sufficient to offset 95% of the trainee's average basic salaries. Within ENT surgery, clinical  
46  
47 activity undertaken by SHO grade doctors was calculated to generate an annual net income  
48  
49 of £73,048 (4.3 times higher than their employment costs)<sup>25</sup>. Registrars generated an annual  
50  
51 net income of £121,587 (5.4 times their employment cost). In total, 94% of trainees  
52  
53 included in this analysis generated more hospital income than their employment costs.  
54  
55  
56  
57  
58  
59  
60

1  
2  
3 Given the benefit derived from hospitals from trainee-related clinical activity, it is  
4  
5 reasonable that a proportionate amount of the associated costs of training should be borne  
6  
7 by the employing hospitals.  
8  
9

10  
11 The costs analysed in this study present a comprehensive overview of the breadth and  
12  
13 depth of costs incurred by trainees. The survey was widely distributed across regions,  
14  
15 specialties and grades, increasing the likelihood that it is representative of trainee  
16  
17 experience. Future studies should seek to understand the balance of costs incurred by the  
18  
19 health system in supporting training, which are poorly understood, the influence of training  
20  
21 cost on career choice, and wider international comparisons on the costs of training in  
22  
23 different health systems.  
24  
25  
26  
27  
28  
29  
30  
31  
32  
33  
34  
35  
36  
37  
38  
39  
40  
41  
42  
43  
44  
45  
46  
47  
48  
49  
50  
51  
52  
53  
54  
55  
56  
57  
58  
59  
60

## Conclusions

Medical students are graduating with increasing debt. Surgical trainees achieve their educational requirements through considerable personal expenditure, with a total estimated monetary cost to the trainee in the region of £40,000 (£47,000). The Certificate of Completion of Training in surgical specialties comes with significant costs, which until now have not been accurately estimated. The cost goes far beyond the national training fee paid to the JCST annually in the UK, and greater transparency is immediately necessary to inform doctors of what their postgraduate training costs will be across all specialties. We strongly believe that the costs of mandatory surgical training should be covered by the Local Education and Training Boards, including the JCST fee and the costs of achieving CCT mandatory requirements. Furthermore, funding should be made available for non-mandatory surgical educational activity deemed beneficial by the trainee's educational supervisor, to ensure surgeons are trained to the highest level to provide excellent care. This is necessary to increase diversity in surgery, reduce debt load and make surgery a popular career choice again.



## Acknowledgements

We thank all those trainees who took the time to complete the survey. We acknowledge the work done by Edward Fitzgerald and Charles Giddings on the previous 2007 costs of surgical training survey.

## Contributors

RLH and JEFF conceived the study. All authors designed the questionnaire. JMOC collected the data. JMOC, HMM and RLH analysed the data. All authors were responsible for compiling and editing the manuscript, and approving the final article.

## Competing interests

The authors are either current or previous surgical trainees, and current or past elected members of the Council of the Association of Surgeons in Training (Registered Charity No. 274841). JEFF is an employee of KPMG Global Health Practice, Honorary Clinical Advisor to the Lifebox Foundation charity, and a Trustee of the SURG Foundation research charity. The authors have no other relevant financial or personal conflicts of interest to declare in relation to this paper.

## Funding

This research received no specific grant from any funding agency in the public, commercial or not-for-profit sectors.

## Data sharing statement

1  
2  
3 Summary data is available from the corresponding author at president@asit.org. Consent to  
4  
5 data sharing was sought prior to survey completion, and the presented data are anonymised  
6  
7  
8 grouped, hence risk of individual identification is low.  
9  
10  
11  
12  
13  
14  
15  
16  
17  
18  
19  
20  
21  
22  
23  
24  
25  
26  
27  
28  
29  
30  
31  
32  
33  
34  
35  
36  
37  
38  
39  
40  
41  
42  
43  
44  
45  
46  
47  
48  
49  
50  
51  
52  
53  
54  
55  
56  
57  
58  
59  
60

For peer review only

**Table 1.** Basic Demographics. Respondents divided by country of work.

| Demographic           | United Kingdom            | Ireland               |
|-----------------------|---------------------------|-----------------------|
| Number                | 848                       | 58                    |
| Male: Female (%)      | 518:327 (61.3:38.7, 3 NR) | 35:23 (60:40)         |
| Mean Age (years)      | 31.6 (range 23-55)        | 31.3 (range 25 to 41) |
| LTFT Trainees (%)     | 36 (4.3)                  | 0                     |
| Academic Trainees (%) | 69 (8.1)                  | N/A                   |

*NR= Not Reported, LTFT= Less than full time training*

For peer review only

**Table 2.** Specialty, stage of training and LETB (Local Education and Training Board) for respondents from UK.

| Which specialty do you intend to pursue?                                                                                                                                                                                                                                                                                                              | What is your stage of training?                                                                                                                                                                                                                                                                                                                                                             | In which LETB/Deanery do you work?                                                                                                                                                                                                                                                                                                                                                                                                                                       |
|-------------------------------------------------------------------------------------------------------------------------------------------------------------------------------------------------------------------------------------------------------------------------------------------------------------------------------------------------------|---------------------------------------------------------------------------------------------------------------------------------------------------------------------------------------------------------------------------------------------------------------------------------------------------------------------------------------------------------------------------------------------|--------------------------------------------------------------------------------------------------------------------------------------------------------------------------------------------------------------------------------------------------------------------------------------------------------------------------------------------------------------------------------------------------------------------------------------------------------------------------|
| Cardiothoracic Surgery: 32 (3.8%)<br>General Surgery: 296 (34.9%)<br>Neurosurgery: 28 (3.3%)<br>Oral and Maxillofacial: 19 (2.2%)<br>Otolaryngology: 75 (8.8%)<br>Paediatric Surgery: 29 (3.4%)<br>Plastic Surgery: 66 (7.8%)<br>Trauma and Orthopaedics: 172 (20.3%)<br>Vascular Surgery: 59 (5.4%)<br>Urology: 59 (7.0%)<br>Other/Unsure: 26 (3.1%) | Foundation Year 1: 12 (1.4%)<br>Foundation Year 2: 63 (7.4%)<br>ST1/CT1/SHO1: 148 (17.5%)<br>ST2/CT2/SHO2: 96 (11.3%)<br>CT3/SHO3: 10 (1.2%)<br>ST3/SPR1: 78 (9.2%)<br>ST4/SPR2: 59 (7.0%)<br>ST5/SPR3: 77 (9.1%)<br>ST6/SPR4: 59 (7.0%)<br>ST7/SPR5: 60 (7.1%)<br>ST8/SPR6: 67 (7.9%)<br>Post CCT: 17 (2.0%)<br>Clinical Fellow: 35 (4.1%)<br>Research Post: 53 (6.3%)<br>Other: 14 (1.7%) | Scotland: 70 (8.3%)<br>Northern Ireland: 49 (5.8%)<br>Wales: 51 (6.0%)<br>North East: 42 (5.0%)<br>North West: 80 (9.4%)<br>Yorkshire and Humber: 55 (6.5%)<br>East Midlands: 51 (6.0%)<br>West Midlands: 70 (8.3%)<br>East of England: 61 (7.2%)<br>Thames Valley: 41 (4.8%)<br>Kent, Surrey and Sussex: 41 (4.8%)<br>Wessex: 41 (4.8%)<br>South West: 61 (7.2%)<br>North East and Central London: 43 (5.1%)<br>North West London: 44 (5.2%)<br>South London: 46 (5.4%) |

CT= Core Training, NCE = North Central and East London, SPR= Specialist Registrar, ST= Specialist Training.

**Table 3.** Specialty and stage of training for respondents from Ireland.

| Which specialty do you intend to pursue? | What is your stage of training? |
|------------------------------------------|---------------------------------|
| Cardiothoracic Surgery: 2 (3%)           | ST1/CT1/SHO1: 13 (22%)          |
| General Surgery: 22 (38%)                | ST2/CT2/SHO2: 10 (17%)          |
| Neurosurgery: 1(2%)                      | ST3/SPR1: 12 (21%)              |
| Oral and Maxillofacial: 0                | ST4/SPR2: 5 (9%)                |
| Otolaryngology: 2 (3%)                   | ST5/SPR3: 4 (7%)                |
| Paediatric Surgery: 0                    | ST6/SPR4: 2 (3%)                |
| Plastic Surgery: 3(5%)                   | ST7/SPR5: 1 (2%)                |
| Trauma and Orthopaedics: 20(34%)         | ST8/SPR6: 3 (5%)                |
| Vascular Surgery: 2(3%)                  | Clinical Fellow: 1 (2%)         |
| Urology: 6 (10%)                         | Research Post: 1 (2%)           |

CT= Core Training, SPR= Specialist Registrar, ST= Specialist Training.

## References

1. Joint Committee on Surgical Training National Selection Leads Group, Verbal Communication 2016.
2. Jaunoo SS, King TR, Baker RF, Adama HL. A national survey of reasons why students and junior doctors choose not to pursue a career in surgery. *Annals of the Royal College of Surgeons* 2014;**96 (Suppl)**:192-94
3. Stroman L, Weil S, Butler K, McDonald C. The cost of a number: can you afford to become a surgeon? *The Bulletin of the Royal College of Surgeons of England* 2015;**97(3)**:107-11 doi: 10.1308/147363515x14162390057944[published Online First: Epub Date] | .
4. *The Cost of Surgical Training, Position Statement*. London, UK: Association of Surgeons in Training, 2007.
5. *Student Loans in England: Financial Year 2015-16*. Glasgow, UK: The Student Loans Company, 2016.
6. Ercolani MG, Vohra RS, Carmichael F, Mangat K, Alderson D. The lifetime cost to English students of borrowing to invest in a medical degree: a gender comparison using data from the Office for National Statistics. *BMJ open* 2015;**5(4)**:e007335 doi: 10.1136/bmjopen-2014-007335[published Online First: Epub Date] | .
7. *Statistical bulletin: UK consumer price inflation: Nov 2016*: Office for National Statistics, 2016.
8. *Defence healthcare education and training (DHET)- Applications polic for defence medical services (DMS) external education and training, 4-6-3. 1.2 ed*. Joint Services Publication, 2014.

- 1  
2  
3 9. Joint Committee on Surgical Training and Royal College of Surgeons in Ireland, Verbal  
4  
5 Communication.  
6  
7
- 8  
9 10. Jones TL, Baxter MA, Khanduja V. A quick guide to survey research. Annals of the Royal  
10  
11 College of Surgeons of England 2013;**95**(1):5-7 doi:  
12  
13 10.1308/003588413x13511609956372[published Online First: Epub Date]].  
14
- 15  
16 11. Eysenbach G. Improving the quality of Web surveys: the Checklist for Reporting Results  
17  
18 of Internet E-Surveys (CHERRIES). Journal of medical Internet research 2004;**6**(3):e34 doi:  
19  
20 10.2196/jmir.6.3.e34[published Online First: Epub Date]].  
21  
22
- 23  
24 12. Woodward CA. Questionnaire construction and question writing for research in medical  
25  
26 education. Medical education 1988;**22**(4):345-63  
27
- 28  
29 13. JE B, JW K, CC H. Organizational research: determining appropriate sample size in survey  
30  
31 research. Information Technology, Learning and Performance Journal 2001;**19**(1):43-50  
32  
33
- 34  
35 14. ECB. Euro foreign exchange reference rates: European Central Bank, 2017.  
36
- 37  
38 15. von Elm E, Altman DG, Egger M, Pocock SJ, Gotsche PC, Vandenbroucke JP. The  
39  
40 Strengthening the Reporting of Observational Studies in Epidemiology (STROBE) statement:  
41  
42 guidelines for reporting observational studies. Lancet (London, England)  
43  
44 2007;**370**(9596):1453-7 doi: 10.1016/s0140-6736(07)61602-x[published Online First: Epub  
45  
46 Date]].  
47
- 48  
49 16. Varley I, Kumar A. Cost of training in oral and maxillofacial surgery: beyond the second  
50  
51 degree. The British journal of oral & maxillofacial surgery 2016;**54**(8):956-58 doi:  
52  
53 10.1016/j.bjoms.2016.06.006[published Online First: Epub Date]].  
54  
55
- 56  
57 17. Fitzgerald JE, Giddings CE, Khera G, Marron CD. Improving the future of surgical training  
58  
59  
60

1  
2  
3 and education: consensus recommendations from the Association of Surgeons in Training.

4  
5 International journal of surgery (London, England) 2012;**10**(8):389-92 doi:

6  
7 10.1016/j.ijssu.2012.03.012[published Online First: Epub Date] |.

8  
9  
10 18. British Medical Association. Pay scales for Consultants. 2017.

11  
12 <https://www.bma.org.uk/advice/employment/pay/consultants-pay-england>

13  
14  
15  
16 19. Health Service Executive. April 1<sup>st</sup> 2017 Revised Consolidated Payscales.

17  
18 <http://www.hse.ie/eng/staff/benefitsservices/pay/Consolidated-Payscales-1st-April->

19  
20  
21 2017.pdf

22  
23  
24 20. Orr K, Smith M. The financial burden of specialty training. BMJ Careers

25  
26  
27 2016;**353**(8063):542

28  
29  
30 21. Costs of qualifying. Secondary Costs of qualifying 2017.

31  
32 [http://www.lawsociety.org.uk/law-careers/becoming-a-solicitor/costs-of-qualifying/.](http://www.lawsociety.org.uk/law-careers/becoming-a-solicitor/costs-of-qualifying/)

33  
34  
35 22. TargetJobs- Law. 2017.

36  
37  
38 23. Curtis L, Burns A. Unit costs of health and social care 2016: Personal social services

39  
40  
41 research unit, University of Kent, 2016.

42  
43 24. Fitzgerald JE, Ravindra P, Lepore M, Armstrong A, Bhangu A, Maxwell-Armstrong CA.

44  
45 Financial impact of surgical training on hospital economics: an income analysis of 1184 out-

46  
47 patient clinic consultations. International journal of surgery (London, England)

48  
49 2013;**11**(5):378-82 doi: 10.1016/j.ijssu.2013.02.017[published Online First: Epub Date] |.

50  
51  
52 25. Clamp PJ, Malpas G, Mason KA, Giddings CE. Surgeons in training – a financial burden or

53  
54  
55 benefit to NHS trusts? Ann R Coll Surg Engl (Suppl) 2011;**93**:22-24



1  
2  
3 **Figure 1.** Stages and years of training for UK doctors training to be consultant surgeons.

4  
5 Foundation Doctor Year 1 is the first stage following graduation from university/medical  
6  
7 school. In Ireland, the Intern Year is the equivalent of the Foundation Doctor stage in the  
8  
9 UK.  
10

11  
12  
13  
14  
15 **Figure 2.** Mean debt on graduation from medical school, UK medical schools only. Debt has  
16  
17 increased significantly comparing the most recent generation (graduation between 2010  
18  
19 and 2014) with the older generation (graduation between 2000 and 2004),  $p < 0.01$ .  
20  
21  
22

23  
24  
25  
26 **Figure 3.** Mean expense per year on courses and conferences that trainees have not been  
27  
28 reimbursed. Trainees grouped into 5- year generations by year of graduation. Expense on  
29  
30 courses has increased significantly comparing the most recent generation (graduation  
31  
32 between 2010 and 2014) with the older generation (graduation between 2000 and 2004),  
33  
34  $p < 0.01$ . Expense on conferences has not significantly increased ( $p = 0.28$ ). UK medical school  
35  
36 graduates only.  
37  
38  
39  
40  
41  
42  
43  
44  
45  
46  
47  
48  
49  
50  
51  
52  
53  
54  
55  
56  
57  
58  
59  
60

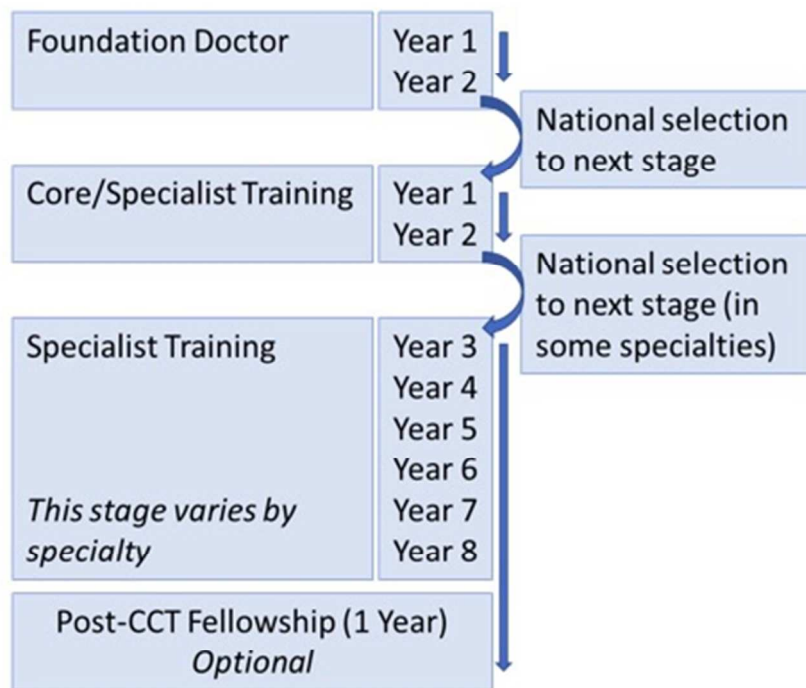

Figure 1. Stages and years of training for UK doctors training to be consultant surgeons. Foundation Doctor Year 1 is the first stage following graduation from university/medical school. In Ireland, the Intern Year is the equivalent of the Foundation Doctor stage in the UK.!! †

44x34mm (300 x 300 DPI)

For peer review only

1  
2  
3  
4  
5  
6  
7  
8  
9  
10  
11  
12  
13  
14  
15  
16  
17  
18  
19  
20  
21  
22  
23  
24  
25  
26  
27  
28  
29  
30  
31  
32  
33  
34  
35  
36  
37  
38  
39  
40  
41  
42  
43  
44  
45  
46  
47  
48  
49  
50  
51  
52  
53  
54  
55  
56  
57  
58  
59  
60

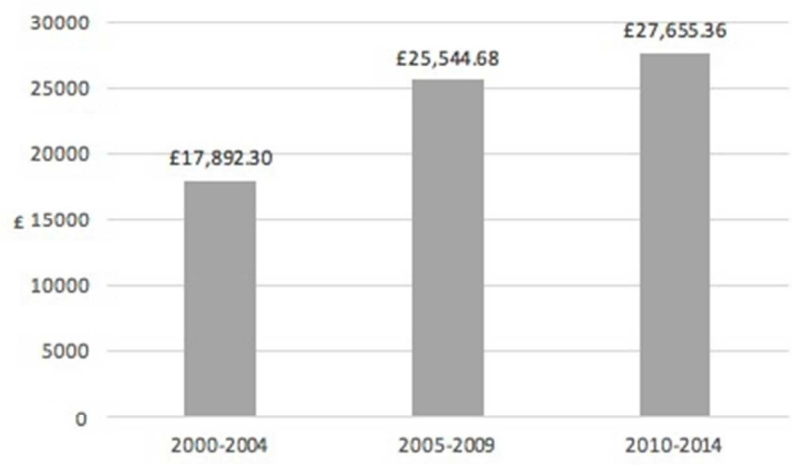

Figure 2. Mean debt on graduation from medical school, UK medical schools only. Debt has increased significantly comparing the most recent generation (graduation between 2010 and 2014) with the older generation (graduation between 2000 and 2004),  $p < 0.01$ .!! †

42x25mm (300 x 300 DPI)

Review only

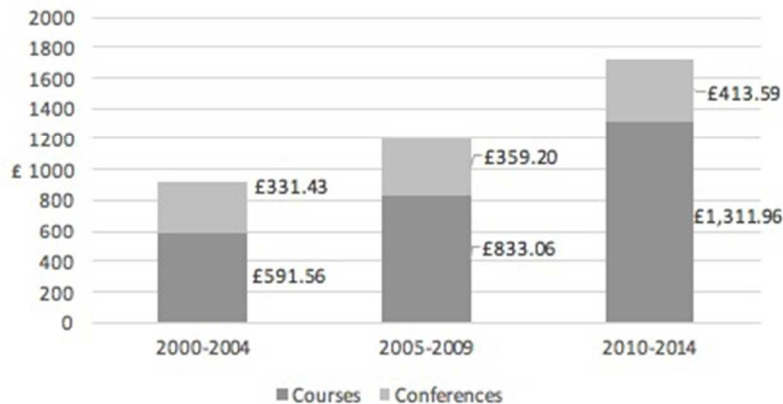

Figure 3. Mean expense per year on courses and conferences that trainees have not been reimbursed. Trainees grouped into 5- year generations by year of graduation. Expense on courses has increased significantly comparing the most recent generation (graduation between 2010 and 2014) with the older generation (graduation between 2000 and 2004),  $p < 0.01$ . Expense on conferences has not significantly increased ( $p = 0.28$ ). UK medical school graduates only.!! †

43x21mm (300 x 300 DPI)

Review only

### Appendix One: Sources of Funding for Higher Surgical Trainees in Ireland

In Ireland, as the RCSI directly administers surgical training in Ireland, it receives funding from the HSE to provide surgical training. This includes covering the cost of the JCST fee and delivering the curriculum, including human factors and operative skills training days. However, other elements essential for CCT such as a leadership course, train the trainers course and good clinical practice are currently not directly provided. There are three funding streams available to trainees on higher specialist training, equivalent to the UK “study budget”- the current funding available to HST trainees are:

1. Mandatory Fund- this is provided by the HSE/NDTP and administered by RCSI. It provides funding of up to 1500 euros for approved mandatory courses while in full-time training in Ireland. This fund does not carry forward year on year and cannot be used if for example, on an overseas fellowship. However, its scope is limited as only approved mandatory courses are funded (1).
2. Specialist training fund- this is a fund of 500 euros per year, which accumulates over the course of HST. It can be used for course fees, equipment costs and books etc. It excludes time spent out of full time training, e.g. on an overseas fellowship (1).
3. There is an additional clinical courses and exams fund, where trainees can claim 450 euros for exams or courses on a definitive list of those deemed relevant to the speciality. This includes a narrow list, for example Advanced Trauma Life Support (ATLS). For exams undertaken outside of Ireland, 650 may be claimed. This is directly administered by the HSE/MET (2). The fund will only cover the cost once per trainee per examination.

At the time of this survey, many trainees would have spent time prior to commencing HST completing courses to make themselves competitive to apply for HST at considerable personal cost. In addition, the range of courses covered by the above list currently excludes many courses undertaken by trainees in their surgical training.

1  
2  
3 It is worth noting that the fund does not adequately cover the cost of courses. For example, the clinical course and examination refund scheme will cover  
4  
5 ATLS if undertaken in Ireland. The current cost of ATLS is 875 euros, but the scheme will only cover 450 euros. This does not include travel and  
6  
7 accommodation costs to regional centres to complete the course. Similarly, for membership and intercollegiate examinations, this fund does not fully cover  
8  
9 the cost, and as these are often held in the UK there are additional travel and accommodation expenses.  
10  
11  
12

13  
14 References Appendix 1:

- 15  
16  
17 1. RCSI Training Funds for SpR Trainees. [http://rcsi.ie/files/surgery/docs/20161019040654\\_Funding-Information-2016.pdf](http://rcsi.ie/files/surgery/docs/20161019040654_Funding-Information-2016.pdf) Accessed 16th January 2017  
18  
19 2. HSE-National Doctors Training and Planning. Specialist Training Fund Guidance Document. July 2016.  
20  
21  
22  
23  
24  
25  
26  
27  
28  
29  
30  
31  
32  
33  
34  
35  
36  
37  
38  
39  
40  
41  
42  
43  
44  
45  
46  
47

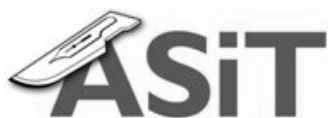

## Cost of Surgical Training Survey 2015

### 1. Introduction

**This survey aims to quantify the additional costs incurred by surgeons in training in pursuit of their career goals. It also aims to quantify the availability of study budgets to cover the required courses and other training needs.**

**A similar survey was conducted by ASiT in 2007 and we aim to give some comparison of changes over time.**

**The results will be freely disseminated, including through publication and on the trainee association websites, and provided to Political Leaders, the Royal Colleges, JCST and Specialty Associations.**

**Completion indicates your consent for this analysis, distribution and publication of anonymised, grouped results. Individual responses remain anonymous.**

**This survey is for ALL TRAINEES, REGARDLESS OF SURGICAL SPECIALTY in the UK and Republic of Ireland. Students are not included.**

**It takes approximately 10 minutes to complete.**

**For more information:**

**[www.asit.org](http://www.asit.org)**

**[info@asit.org](mailto:info@asit.org)**

**[@ASiTofficial](#)**

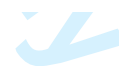

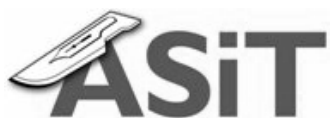

## Cost of Surgical Training Survey 2015

### 2. In which country do you work?

\* 1. Where do you work currently?

- United Kingdom
- Republic of Ireland
- Other

Other (please specify)

er review only



1  
2  
3  
4  
5  
6  
7  
8  
9  
10  
11  
12  
13  
14  
15  
16  
17  
18  
19  
20  
21  
22  
23  
24  
25  
26  
27  
28  
29  
30  
31  
32  
33  
34  
35  
36  
37  
38  
39  
40  
41  
42  
43  
44  
45  
46  
47  
48  
49  
50  
51  
52  
53  
54  
55  
56  
57  
58  
59  
60

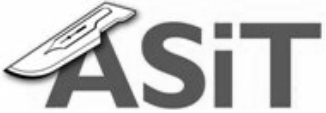

Cost of Surgical Training Survey 2015

3. Pay

1 \* 2. What is your current basic salary (without overtime, to the nearest euro)?

2 Please do not enter commas or symbols into any boxes relating to numerical values.

3  
4  
5 To remind you, current payscales are:

6  
7 Intern € 30257

8 Senior House Officer

9 1 € 38839

10 2 € 40998

11 3 € 44224

12 4 € 46334

13 5 € 50578

14 6 € 52687

15 7 € 54746

16 Registrar

17 1 € 50578

18 2 € 52687

19 3 € 54746

20 4 € 56260

21 5 € 58279

22 6 € 60305

23 Senior Registrar

24 1 € 65000

25 2 € 65000

26 3 € 65620

27 4 € 67682

28 5 € 70061

29 6 € 72540

30 7 € 75097

31 Specialist Registrar

32 1 € 60404

33 2 € 61855

34 3 € 63953

35 4 € 65000

36 5 € 66070

37 6 € 68980

38 7 € 71878

39  
40  
41  
42  
43  
44  
45  
46  
47  
48  
49  
50  
51

52  
53 \* 3. What is your current average monthly take home pay after tax (to the nearest euro)?

54  
55

56  
57  
58  
59  
60

1 4. Are you getting paid for your overtime?  
2  
3

4  Yes- rostered only- all of it  
5

6  Yes- rostered only-some of it  
7

8  Yes- rostered and unrostered- all of it  
9

10  Yes-rostered and unrostered- some of it  
11

12  No  
13

14 \* 5. Are you currently entitled to a training fund? (e.g. the SpR mandatory training fund or specialist  
15 training fund?)  
16

17  Yes  
18

19  No  
20  
21  
22  
23  
24  
25  
26  
27  
28  
29  
30  
31  
32  
33  
34  
35  
36  
37  
38  
39  
40  
41  
42  
43  
44  
45  
46  
47  
48  
49  
50  
51  
52  
53  
54  
55  
56  
57  
58  
59  
60

peer review only

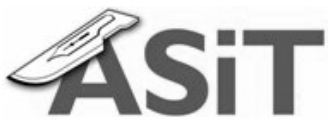

## Cost of Surgical Training Survey 2015

### 4. Demographics

\* 6. Are you a military trainee?

Yes

No

7. What is your gender?

Male

Female

\* 8. What is your age? (years)

view only

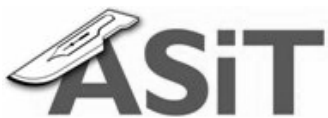

## Cost of Surgical Training Survey 2015

### 5. Current Post

\* 9. Do you currently hold an academic post?

Yes

No

\* 10. Are you in Less Than Full Time Training?

Yes

No

11. Are you currently on leave?

Yes- Maternity/Paternity leave

Yes- Other leave

No

\* 12. Which specialty do you intend to pursue?

Cardiothoracic surgery

General Surgery

ENT

Neurosurgery

Oral and Maxillofacial surgery

Paediatric Surgery

Plastic Surgery

Trauma and Orthopaedics

Vascular Surgery

Urology

Other (please specify)

## \* 13. What is your current grade?

- 1  
2  
3  
4  
5  
6  
7  
8  
9  
10  
11  
12  
13  
14  
15  
16  
17  
18  
19  
20  
21  
22  
23  
24  
25  
26  
27  
28  
29  
30  
31  
32  
33  
34
- F1 or Intern
  - F2
  - ST1/CT1/SHO1
  - ST2/CT2/SHO2
  - CT3/SHO3
  - ST3/SpR1
  - ST4/SpR2
  - ST5/SpR3
  - ST6/SpR4
  - ST7/SpR5
  - ST8/SpR6
  - Post CCT
  - Clinical Fellow
  - Research post with no clinical work
  - Research post with part-time clinical work
  - Part-time clinical non-training
  - Other (please specify)

35  
36  
37  
38  
39  
40  
41  
42  
43  
44  
45  
46  
47  
48  
49  
50  
51  
52  
53  
54  
55  
56  
57  
58  
59  
60

\* 14. Under which Deanery/Local Education Training Board do you work?

- Republic of Ireland
- NHS Education for Scotland
- Northern Ireland Medical and Dental Training Agency
- Wales Deanery
- Health Education North East
- Health Education North West
- Health Education Yorkshire and the Humber
- Health Education East Midlands
- Health Education West Midlands
- Health Education East of England
- Health Education Thames Valley
- Health Education Kent, Surrey and Sussex
- Health Education Wessex
- Health Education South West
- Health Education North Central and East London
- Health Education North West London
- Health Education South London

ew only



## Cost of Surgical Training Survey 2015

### 6. Current Salary

\* 15. WITHOUT BANDING- What is your current basic salary? (gross, to the nearest pound)

Please do not enter commas or symbols into any boxes relating to numerical values.

To remind you, doctors in training pay scales:

England, Northern Ireland and Wales (Scotland in brackets).

FY1

22636 (23205)

24049 (24654)

25461 (26102)

FY2

28076 (28782)

29912 (30664)

31748 (32546)

Specialty Training

30002 (30605)

31838 (32478)

34402 (35093)

35952 (36675)

37822 (38582)

39693 (40491)

41564 (42399)

43434 (44307)

45304 (46215)

47175 (48123)



1  
2  
3  
4  
5  
6  
7  
8  
9  
10  
11  
12  
13  
14  
15  
16  
17  
18  
19  
20  
21  
22  
23  
24  
25  
26  
27  
28  
29  
30  
31  
32  
33  
34  
35  
36  
37  
38  
39  
40  
41  
42  
43  
44  
45  
46  
47  
48  
49  
50  
51  
52  
53  
54  
55  
56  
57  
58  
59  
60

\* 16. What is your current banding as per your contract?

- 1A
- 1B
- 1C
- 2A
- 2B
- 3
- Military- no banding recieved
- Other (please specify)

\* 17. Are you currently entitled to a study leave budget?

- Yes
- No
- Military trainee- funding at discretion of Defence Deanery

If yes, please give the approximate value for 12 months (to the nearest pound)

view only



## Cost of Surgical Training Survey 2015

### 7. Debts

\* 18. What year did you qualify from medical school?

\* 19. Where was your medical school?

- UK
- Republic of Ireland
- Other EU
- Outside EU

\* 20. Whilst at medical school have you received any of the following?

- Government student loan
- Military grant
- Bank or other loan
- NHS bursary
- Other bursary
- None of the above

\* 21. If, on qualifying from medical, school you had debt (overdraft, credit cards and all student or professional loans, excluding mortgages) - please estimate the total value at that time (to the nearest pound or euro)

\* 22. Is some or all of your study budget used to fund mandatory regional teaching?

- Some
- All
- None
- Don't know

1  
2  
3  
4  
5  
6  
7  
8  
9  
10  
11  
12  
13  
14  
15  
16  
17  
18  
19  
20  
21  
22  
23  
24  
25  
26  
27  
28  
29  
30  
31  
32  
33  
34  
35  
36  
37  
38  
39  
40  
41  
42  
43  
44  
45  
46  
47  
48  
49  
50  
51  
52  
53  
54  
55  
56  
57  
58  
59  
60

\* 23. How much in total have you have paid for courses out of your own money that was not reimbursed (cumulative over training, to the nearest pound or euro)?

\* 24. How much in total have you paid for conferences out of your own money that was not reimbursed (cumulative over training, to the nearest pound or euro)?

For peer review only



Cost of Surgical Training Survey 2015

8. Expenditures- Course and Exam Attendance

\* 25. During your surgical training please identify which of the following courses or exams you have attended/attempted, and how many times:

|                       | Once                  | Twice                 | 3 x                   | More                  | Never                 |
|-----------------------|-----------------------|-----------------------|-----------------------|-----------------------|-----------------------|
| ALS                   | <input type="radio"/> |
| APaedLS               | <input type="radio"/> |
| ATLS                  | <input type="radio"/> |
| Basic Surgical Skills | <input type="radio"/> |
| CCriSP                | <input type="radio"/> |
| USMLE                 | <input type="radio"/> |
| RCSEng STEP           | <input type="radio"/> |
| MRCS Parts 1&2/A      | <input type="radio"/> |
| MRCS Part 3/B         | <input type="radio"/> |
| DOHNS                 | <input type="radio"/> |
| FRCS Part 1           | <input type="radio"/> |
| FRCS Part 2           | <input type="radio"/> |
| Training the Trainers | <input type="radio"/> |

\* 26. For any of the following courses or exams you attended, did you receive any funding?

|                       | All                   | Part                  | None                  | Not applicable        |
|-----------------------|-----------------------|-----------------------|-----------------------|-----------------------|
| ALS                   | <input type="radio"/> | <input type="radio"/> | <input type="radio"/> | <input type="radio"/> |
| APaedLS               | <input type="radio"/> | <input type="radio"/> | <input type="radio"/> | <input type="radio"/> |
| ATLS                  | <input type="radio"/> | <input type="radio"/> | <input type="radio"/> | <input type="radio"/> |
| Basic Surgical Skills | <input type="radio"/> | <input type="radio"/> | <input type="radio"/> | <input type="radio"/> |
| CCriSP                | <input type="radio"/> | <input type="radio"/> | <input type="radio"/> | <input type="radio"/> |
| USMLE                 | <input type="radio"/> | <input type="radio"/> | <input type="radio"/> | <input type="radio"/> |
| RCSEng STEP           | <input type="radio"/> | <input type="radio"/> | <input type="radio"/> | <input type="radio"/> |
| MRCS Parts 1&2/A      | <input type="radio"/> | <input type="radio"/> | <input type="radio"/> | <input type="radio"/> |
| MRCS Part 3/B         | <input type="radio"/> | <input type="radio"/> | <input type="radio"/> | <input type="radio"/> |
| DOHNS                 | <input type="radio"/> | <input type="radio"/> | <input type="radio"/> | <input type="radio"/> |
| FRCS Part 1           | <input type="radio"/> | <input type="radio"/> | <input type="radio"/> | <input type="radio"/> |
| FRCS Part 2           | <input type="radio"/> | <input type="radio"/> | <input type="radio"/> | <input type="radio"/> |
| Training the Trainers | <input type="radio"/> | <input type="radio"/> | <input type="radio"/> | <input type="radio"/> |

\* 27. In the last year, how much have you spent attending MANDATORY courses (to the nearest pound or euro)?

\* 28. How much of this has been, or will be, reimbursed through your study budget or other funding (to the nearest pound or euro)?

\* 29. In the last year, how much have you spent attending NON-MANDATORY training courses (to the nearest pound or euro)?

\* 30. How much of this has been, or will be, reimbursed through your study budget or other funding (to the nearest pound or euro)?

\* 31. Since graduation from medical school, how much have you spent on registering for, or attending, post-graduate exams (to the nearest pound or euro)?

\* 32. How much of this has been reimbursed through your study budget or other funding (to the nearest pound or euro)?

33. Have you received industry funding to attend any of the following?

|             | No industry funding received | Minor industry funding (under half expenditure) | Major industry funding (over half expenditure) | Completely industry funded |
|-------------|------------------------------|-------------------------------------------------|------------------------------------------------|----------------------------|
| Courses     | <input type="radio"/>        | <input type="radio"/>                           | <input type="radio"/>                          | <input type="radio"/>      |
| Conferences | <input type="radio"/>        | <input type="radio"/>                           | <input type="radio"/>                          | <input type="radio"/>      |
| Exams       | <input type="radio"/>        | <input type="radio"/>                           | <input type="radio"/>                          | <input type="radio"/>      |

Or peer review only

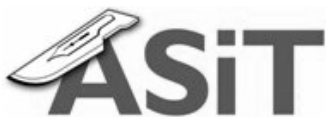

## Cost of Surgical Training Survey 2015

### 9. Expenditures- Conferences, Memberships and Subscriptions

\* 34. In the last year, how much have you spent attending conferences (to the nearest pound or euro)?  
Please include the cost of travel, registration fees and accommodation.

\* 35. How much of this has been, or will be, reimbursed through your study budget or other funding (to the nearest pound or euro)?

\* 36. Have you been refused funding for attending conferences in any of the regions below, for reasons other than your budget has already been used up?

- UK - my deanery
- UK - outside my deanery
- Republic of Ireland
- I have not been refused funding
- Other (please specify)

1 \* 37. Are you a member of any of the following professional bodies or have any other professional fees to  
2 pay?  
3

- 4  General Medical Council or Irish Medical Council  
5  
6  Royal College of Surgeons of Edinburgh  
7  
8  Royal College of Surgeons of England  
9  
10  Royal College of Physicians and Surgeons of Glasgow  
11  
12  Royal College of Surgeons of Ireland  
13  
14  Specialty associations eg ASGBI / SCTS / BOA / ENT-UK / BNS / BAPS / BAOMS / Vascular Society / BAPRAS etc  
15  
16  Sub-specialty associations eg AUGIS / ACPGBI / BRS / ALSGBI / BASO / BTS etc  
17  
18  Trainee associations eg ASiT / BOTA etc  
19  
20  JCST (ISCP training fee)  
21  
22  British Medical Association or Irish Medical Organization  
23  
24  Hospital Consultants and Specialists Association  
25  
26  MDU / MPS / other medical indemnity provider  
27  
28  Royal Society of Medicine  
29  
30  Journal subscriptions  
31  
32  Regional training day fees  
33  
34  Others (please specify)

35

36  
37  
38 \* 38. What is your current annual subscription to your surgical royal college? (to the nearest pound or  
39 euro)  
40

41

42  
43  
44 \* 39. In the last year how much have you spent on specialty society memberships (excluding surgical  
45 royal colleges, to the nearest pound or euro)?  
46

47

48  
49  
50  
51 \* 40. In the last year how much have you spent on journal subscriptions (to the nearest pound or euro)?  
52

53

54  
55  
56 \* 41. In the last year how much have you spent on text books (to the nearest pound or euro)?  
57

58



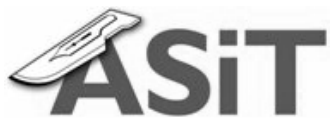

## Cost of Surgical Training Survey 2015

### 10. Out of Training Fellowships and Postgraduate Degrees

\* 42. Have you undertaken a post-graduate degree since graduating from medical school?

- Yes- MD
- Yes- PhD/DPhil
- Yes- MSc
- Yes- MPhil
- Yes- MEd
- Yes- MA
- Yes- MS/MChir
- No

Yes- Other (please specify)

43. If yes, please estimate the cost of this degree to you personally in monetary terms. Please consider university fees and potential income lost that was not covered by any other funding source.

\* 44. Have you undertaken an overseas or other out-of-training fellowship?

- Yes
- No

45. If, yes, did this negatively impact on your financial situation, please describe.



## Cost of Surgical Training Survey 2015

### 11. Financial Advice

\* 46. Have you previously claimed tax relief from HM Revenue & Customs (or Revenue Tax and customs Ireland/Cain agus Custaim na hEireann) on any of the training and professional costs below? Please select all those that apply.

- GMC or Irish Medical Council
- Surgical Royal College
- MPS/MDU
- BMA or IMO
- Specialty Association
- Journal Subscriptions
- Exam Fees
- JCST
- Courses
- Conferences
- I have not claimed tax relief for any of the professional costs above

\* 47. Do you have, or have you ever consulted an accountant or financial advisor?

- Accountant
- Financial advisor
- Both
- Neither

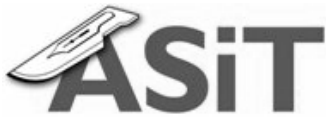

## Cost of Surgical Training Survey 2015

### 12. The Non-Monetary Costs of Surgical Training

**Nearly there, this is the last page of questions!**

\* 48. How many times have you moved house for work?

- 1
- 2
- 3
- 4
- 5
- 6
- 7
- 8
- 9
- 10
- 11
- 12
- 13
- 14
- 15
- 16 or above

\* 49. With regards to childcare please select one of the following:

- I do not have children
- I have had to pay for weekend childcare to allow me to work
- I have had to pay for evening childcare to allow me to work
- I have had to pay for both evening and weekend childcare to allow me to work
- I have children but have not had to pay for evening or weekend childcare

50. Do you think your surgical training has had a significant cost in terms of any of the following:

|                                            | Yes                   | No                    |
|--------------------------------------------|-----------------------|-----------------------|
| Mental Health                              | <input type="radio"/> | <input type="radio"/> |
| Physical Health                            | <input type="radio"/> | <input type="radio"/> |
| Relationships                              | <input type="radio"/> | <input type="radio"/> |
| Financial Security                         | <input type="radio"/> | <input type="radio"/> |
| Ability to settle down in a permanent home | <input type="radio"/> | <input type="radio"/> |

Other (please specify)

51. Please answer the following questions

|                                                                                                              | Yes                   | No                    | Unsure                |
|--------------------------------------------------------------------------------------------------------------|-----------------------|-----------------------|-----------------------|
| I have missed a major family event due to clinical work                                                      | <input type="radio"/> | <input type="radio"/> | <input type="radio"/> |
| I have missed many family events due to clinical work                                                        | <input type="radio"/> | <input type="radio"/> | <input type="radio"/> |
| I have missed a major family event due to non-clinical work that was necessary for my career progression     | <input type="radio"/> | <input type="radio"/> | <input type="radio"/> |
| I have missed many major family events due to non-clinical work that was necessary for my career progression | <input type="radio"/> | <input type="radio"/> | <input type="radio"/> |
| Staffing levels in my current post impact negatively on my quality of life                                   | <input type="radio"/> | <input type="radio"/> | <input type="radio"/> |
| Rota patterns in my current post impact negatively on my quality of life                                     | <input type="radio"/> | <input type="radio"/> | <input type="radio"/> |

52. Please answer the following questions

|                                                                                                                                                                                                                                           | Yes                   | No                    | Maybe                 |
|-------------------------------------------------------------------------------------------------------------------------------------------------------------------------------------------------------------------------------------------|-----------------------|-----------------------|-----------------------|
| I would support a fixed "training fee", which I would pay annually throughout my training that would cover tuition, courses, exams and fees to professional bodies such as surgical royal colleges, the GMC and one specialty association | <input type="radio"/> | <input type="radio"/> | <input type="radio"/> |
| I would support raising the annual Surgical Royal College Subscription for all MEMBERS AND FELLOWS in order to subsume the costs of the JCST fee                                                                                          | <input type="radio"/> | <input type="radio"/> | <input type="radio"/> |
| I would be happy to fund (up to £500 or 700 euro) a boot-camp in my specialty during core training                                                                                                                                        | <input type="radio"/> | <input type="radio"/> | <input type="radio"/> |
| The cost of surgical training in the UK and Ireland is likely to dissuade me from a career in surgery                                                                                                                                     | <input type="radio"/> | <input type="radio"/> | <input type="radio"/> |
| The cost of training in the UK and Ireland is likely to make me leave medicine altogether                                                                                                                                                 | <input type="radio"/> | <input type="radio"/> | <input type="radio"/> |
| The cost of training in the UK and Ireland is likely to make me leave the UK or Ireland to work as a doctor elsewhere                                                                                                                     | <input type="radio"/> | <input type="radio"/> | <input type="radio"/> |

53. Are there any other comments you would like to make regarding the cost of surgical training, study budgets or any other related matters? Please use the box below.

54. Who do you think should contribute to the cost of surgical training? Please rank the stakeholders below, from most contribution (1), to least (9).

|                          |                      |                                 |
|--------------------------|----------------------|---------------------------------|
| <input type="checkbox"/> | <input type="text"/> | The Government                  |
| <input type="checkbox"/> | <input type="text"/> | NHS Trusts                      |
| <input type="checkbox"/> | <input type="text"/> | Universities                    |
| <input type="checkbox"/> | <input type="text"/> | Private sector providers        |
| <input type="checkbox"/> | <input type="text"/> | Trainees                        |
| <input type="checkbox"/> | <input type="text"/> | Surgical Royal Colleges         |
| <input type="checkbox"/> | <input type="text"/> | Industry                        |
| <input type="checkbox"/> | <input type="text"/> | Surgical specialty associations |

view only

1  
2  
3  
4  
5  
6  
7  
8  
9  
10  
11  
12  
13  
14  
15  
16  
17  
18  
19  
20  
21  
22  
23  
24  
25  
26  
27  
28  
29  
30  
31  
32  
33  
34  
35  
36  
37  
38  
39  
40  
41  
42  
43  
44  
45  
46  
47  
48  
49  
50  
51  
52  
53  
54  
55  
56  
57  
58  
59  
60



## Cost of Surgical Training Survey 2015

### 13. End of Survey

**Thank you for taking the time to complete this survey, we are very grateful for your responses.**

**The results will be freely disseminated, including through publication and on trainee association websites, and provided to Political Leaders, the Royal Colleges, JCST and Specialty Associations.**

**For more information about the work being undertaken on your behalf, please visit our website, email us or tweet:**

**[www.asit.org](http://www.asit.org)**

**[info@asit.org](mailto:info@asit.org)**

**[@ASiTofficial](https://twitter.com/ASiTofficial)**

**For more information regarding professional bodies approved for tax relief:**

**<https://www.gov.uk/government/publications/professional-bodies-approved-for-tax-relief-list-3/approved-professional-organisations-and-learned-societies#g>**

Peer review only

### Appendix Three: Results for military trainees

There were 20 military trainee respondents. All 20 graduated from medical school in the UK: 19 (90%) graduated with debt on graduation (mean £18,650). 16 (80%) had a military grant at medical school, 10 (50%) had a government student loan and 4 (20%) had a bank or other loan. The mean amount paid out, that was not reimbursed, for courses was £4250, for conferences £1643, and £2130 for exams. Mean costs per year included surgical royal college subscription (£317), specialty society membership (£336), journals (£79), text books (£245). 7 had completed an MSc (35%), 5 an MD (25%) and 1 (5%) had done both since graduating from medical school (mean cost £12822).

| Which specialty do you intend to pursue?                                                  | What is your stage of training?                                                                                                                                                                                                                                                  |
|-------------------------------------------------------------------------------------------|----------------------------------------------------------------------------------------------------------------------------------------------------------------------------------------------------------------------------------------------------------------------------------|
| General Surgery: 6 (30%)<br>Trauma and Orthopaedics: 6 (30%)<br>Vascular Surgery: 2 (10%) | Foundation Year 1: 1 (5%)<br>Foundation Year 2: 0 (0%)<br>ST1/CT1/SHO1: 4 (20%)<br>ST2/CT2/SHO2: 2 (10%)<br>ST3/SPR1: 1 (5%)<br>ST4/SPR2: 4 (20%)<br>ST5/SPR3: 2 (10%)<br>ST6/SPR4: 1 (5%)<br>ST7/SPR5: 1 (5%)<br>ST8/SPR6: 1 (5%)<br>Post CCT: 1 (5%)<br>Research Post: 2 (10%) |

| Demographic                  | Military Trainees  |
|------------------------------|--------------------|
| <b>Number</b>                | 20                 |
| <b>Male: Female (%)</b>      | 14:6 (70:30%)      |
| <b>Mean Age (years)</b>      | 33.8 (range 27-41) |
| <b>LTFT Trainees (%)</b>     | 0 (0)              |
| <b>Academic Trainees (%)</b> | 1 (5%)             |

#### Appendix Four: Tables of costs to the trainee in each surgical specialty

Using the published requirements for progression through surgical training we have provided an estimated breakdown of the costs to the trainee in each surgical specialty. The following tables of costs assume straight progression through F1-ST8 without taking time out for LTFT, post-graduate degrees or other career breaks. These prices are correct as of November 2016. July 2016 CCT guidance used as per JCST website. Conference costs do not include travel or subsistence.

*BMA= British Medical Association, CCT= Certificate of Completion of Training, CST= Core Surgical Trainee, CT= Core Training (year), FP=Foundation Programme, FRCS= Fellowship of the Royal College of Surgeons, GMC= General Medical Council, HST=Higher Surgical Trainee, JCST= Joint Committee on Surgical Training, MRCS= Membership of the Royal College of Surgeons, RCS= Surgical Royal College, RCSEng= Royal College of Surgeons of England, RCPSCG= Royal College of Physicians and Surgeons of Glasgow, ST= Specialty Trainee (year).*



1  
2  
3  
4  
5  
6  
7  
8  
9  
10  
11  
12  
13  
14  
15  
16  
17  
18  
19  
20  
21  
22  
23  
24  
25  
26  
27  
28  
29  
30  
31  
32  
33  
34  
35  
36  
37  
38  
39  
40  
41  
42  
43  
44  
45  
46  
47

### Cardiothoracic Surgery

| Requirements                                                                                                                                                   | Cost                                                                                      |
|----------------------------------------------------------------------------------------------------------------------------------------------------------------|-------------------------------------------------------------------------------------------|
| <i>Essential for Surgical Training</i>                                                                                                                         |                                                                                           |
| JCST fee (for 8 years)                                                                                                                                         | £255 per year of surgical training                                                        |
| GMC registration (for 10 years)                                                                                                                                | £200 for FP1 year, £425 per year for FP2+                                                 |
| <i>Mandatory for progression to ST3</i>                                                                                                                        |                                                                                           |
| MRCS examination                                                                                                                                               | £1425                                                                                     |
| <i>Desirable for progression to ST3</i>                                                                                                                        |                                                                                           |
| RCSEng Basic Surgical Skills Course (BSS)                                                                                                                      | £670.50                                                                                   |
| Advanced Trauma Life Support Course (ATLS)                                                                                                                     | £710                                                                                      |
| RCSEng Care of the Critically Ill Surgical Patient Course (CCrISP)                                                                                             | £724                                                                                      |
| RCSEng Specialty Skills in Cardiothoracic Surgery Course                                                                                                       | £774                                                                                      |
| <i>Mandatory for CCT</i>                                                                                                                                       |                                                                                           |
| FRCS examination (including completion fee)                                                                                                                    | £2269                                                                                     |
| Good Clinical Practice Course                                                                                                                                  | Free                                                                                      |
| NHS Management Course e.g. BMA management essentials                                                                                                           | £354                                                                                      |
| Training and Education Course e.g. RCSEng Training the Trainers                                                                                                | £702                                                                                      |
| National or international conference attendance each year of training e.g. Society for Cardiothoracic Surgery conference booked as early bird rate as a member | £205 per year for 2 years as CST, £305 per year for 6 years as HST                        |
| <i>Other</i>                                                                                                                                                   |                                                                                           |
| BMA Membership (for 10 years)                                                                                                                                  | £113 for FP1 year, £222 per year for FP2-CT2, £329 per year for ST3-5, £443 per year ST6+ |
| RCS subscription fees e.g. RCSEng if complete MRCS at CT2 and FRCS as ST8                                                                                      | £316 per year for 5 years as member, £531 for 1 year as fellow                            |
| Specialty Association Membership e.g. Society for Cardiothoracic Surgery                                                                                       | £100 per year for 2 years as CST, £200 per year for 6 years as HST                        |
| Healthcare Protection Organisation (for 10 years) e.g. Medical Defence Union                                                                                   | £1800                                                                                     |
| <b>TOTAL ESTIMATE</b>                                                                                                                                          | <b>£24039.00</b>                                                                          |

## General Surgery

| Requirements                                                                                                                                                                                                                                                                                                                                                                                                                                                                                                                                                                                                                                                      | Cost                                                                                                                                                                                                                                        |
|-------------------------------------------------------------------------------------------------------------------------------------------------------------------------------------------------------------------------------------------------------------------------------------------------------------------------------------------------------------------------------------------------------------------------------------------------------------------------------------------------------------------------------------------------------------------------------------------------------------------------------------------------------------------|---------------------------------------------------------------------------------------------------------------------------------------------------------------------------------------------------------------------------------------------|
| <p><i>Essential for Surgical Training</i><br/>           JCST fee (for 8 years)<br/>           GMC registration (for 10 years)</p>                                                                                                                                                                                                                                                                                                                                                                                                                                                                                                                                | <p>£255 per year of surgical training<br/>           £200 for FP1 year, £425 per year for FP2+</p>                                                                                                                                          |
| <p><i>Mandatory for progression to ST3</i><br/>           MRCS examination<br/>           RCSEng Basic Surgical Skills Course (BSS)<br/>           Advanced Trauma Life Support Course (ATLS)<br/>           RCSEng Care of the Critically Ill Surgical Patient Course (CCrISP)</p>                                                                                                                                                                                                                                                                                                                                                                               | <p>£1425<br/>           £670.50<br/>           £650<br/>           £724</p>                                                                                                                                                                 |
| <p><i>Mandatory for CCT</i><br/>           FRCS examination (and completion fee)<br/>           Good Clinical Practice Course<br/>           NHS Management Course e.g. BMA management essentials<br/>           Training and Education Course e.g. RCSEng Training the Trainers<br/>           Course relevant to specialist interest e.g. RCSEng specialty skills in coloproctology<br/>           ATLS revalidation to keep valid at time of certification<br/>           Attendance at 4 national or international conferences during training e.g. Association of Surgeons of Great Britain and Ireland conference booked as early bird rate as a member</p> | <p>£2269<br/>           Free<br/>           £354<br/>           £702<br/>           £585<br/>           £350<br/>           £260 per year for 4 years</p>                                                                                   |
| <p><i>Other</i><br/>           BMA Membership (for 10 years)<br/> <br/>           RCS subscription fees e.g. RCSEng if complete MRCS at CT2 and FRCS as ST8<br/> <br/>           Specialty Association Membership e.g. Association of Surgeons of Great Britain and Ireland<br/>           Healthcare Protection Organisation (for 10 years) e.g. Medical Defence Union</p>                                                                                                                                                                                                                                                                                       | <p>£113 for FP1 year, £222 per year for FP2-CT2, £329 per year for ST3-5, £443 per year ST6+<br/>           £316 per year for 5 years as member, £531 for 1 year as fellow<br/>           £81 per year for 8 years<br/>           £1800</p> |
| <b>TOTAL ESTIMATE</b>                                                                                                                                                                                                                                                                                                                                                                                                                                                                                                                                                                                                                                             | <b>£22488.50</b>                                                                                                                                                                                                                            |

## Neurosurgery

| Requirements                                                                                                                                                                    | Cost                                                                                      |
|---------------------------------------------------------------------------------------------------------------------------------------------------------------------------------|-------------------------------------------------------------------------------------------|
| <i>Essential for Surgical Training</i>                                                                                                                                          |                                                                                           |
| JCST fee (for 8 years)                                                                                                                                                          | £255 per year of surgical training                                                        |
| GMC registration (for 10 years)                                                                                                                                                 | £200 for FP1 year, £425 per year for FP2+                                                 |
| <i>Mandatory for progression to ST3</i>                                                                                                                                         |                                                                                           |
| MRCS examination                                                                                                                                                                | £1425.00                                                                                  |
| <i>Desirable for progression to ST3</i>                                                                                                                                         |                                                                                           |
| RCSEng Basic Surgical Skills Course (BSS)                                                                                                                                       | £670.50                                                                                   |
| Advanced Trauma Life Support Course (ATLS)                                                                                                                                      | £650.00                                                                                   |
| RCSEng Care of the Critically Ill Surgical Patient Course (CCriSP)                                                                                                              | £724.00                                                                                   |
| <i>Mandatory for CCT</i>                                                                                                                                                        |                                                                                           |
| FRCS examination (including completion fee)                                                                                                                                     | £2269.00                                                                                  |
| Good Clinical Practice Course                                                                                                                                                   | Free                                                                                      |
| Research Methodology Course                                                                                                                                                     | Free                                                                                      |
| NHS Management Course e.g. BMA management essentials                                                                                                                            | £354.00                                                                                   |
| Training and Education Course e.g. RCSEng Training the Trainers                                                                                                                 | £702.00                                                                                   |
| Advanced Trauma Life Support Course (ATLS) completed during training                                                                                                            | included above                                                                            |
| Attendance at 4 national or international conferences during training e.g. Society of British Neurological Surgeons conference booked as early bird rate as an affiliate member | £150 per year for 4 years                                                                 |
| <i>Other</i>                                                                                                                                                                    |                                                                                           |
| BMA Membership (for 10 years)                                                                                                                                                   | £113 for FP1 year, £222 per year for FP2-CT2, £329 per year for ST3-5, £443 per year ST6+ |
| RCS subscription fees e.g. RCSEng if complete MRCS at CT2 and FRCS as ST8                                                                                                       | £316 per year for 5 years as member, £531 for 1 year as fellow                            |
| Specialty Association Membership e.g. Society of British Neurological Surgeons                                                                                                  | £145 per year for 8 years                                                                 |
| Healthcare Protection Organisation (for 10 years) e.g. Medical Defence Union                                                                                                    | £1800                                                                                     |
| <b>TOTAL ESTIMATE</b>                                                                                                                                                           | <b>£21625.50</b>                                                                          |

### Oral and Maxillofacial Surgery

| Requirements                                                                                                  | Cost                                      |
|---------------------------------------------------------------------------------------------------------------|-------------------------------------------|
| <i>Essential for Surgical Training</i>                                                                        |                                           |
| Bachelor of Dental Surgery e.g. University of Liverpool BDS graduate entry                                    | £9000 for 4 years                         |
| JCST fee (for 7 years)                                                                                        | £255 per year of surgical training        |
| GMC registration (for 9 years)                                                                                | £200 for FP1 year, £425 per year for FP2+ |
| GDC registration (for 9 years)                                                                                | £890 per year                             |
| <i>Mandatory for progression to ST3</i>                                                                       |                                           |
| MRCs examination                                                                                              | £1425                                     |
| <i>Desirable for progression to ST3</i>                                                                       |                                           |
| Advanced Trauma Life Support Course (ATLS)                                                                    | £650                                      |
| RCSEng Care of the Critically Ill Surgical Patient Course (CCrISP)                                            | £724                                      |
| Acute Life-threatening Events Recognition and Treatment (ALERT) Course                                        | £95                                       |
| <i>Mandatory for CCT</i>                                                                                      |                                           |
| FRCS examination (including completion fee)                                                                   | £2269                                     |
| Good Clinical Practice Course                                                                                 | Free                                      |
| Research Methodology Course                                                                                   | Free                                      |
| NHS Management Course e.g. BMA management essentials                                                          | £354                                      |
| Training and Education Course e.g. RCSEng Training the Trainers                                               | £702                                      |
| ATLS revalidation to keep valid at time of certification                                                      | £350                                      |
| Emergency Skills Course e.g. RCSEng Emergency Skills in Oral and Maxillofacial Surgery                        | £877.50                                   |
| Basic Plating Course e.g. AO basic OMFS plating course                                                        | £499                                      |
| Head and Neck Anatomy Course e.g. RCSEng basic surgical anatomy of the head and neck                          | £414                                      |
| Surgical Dermatology Course e.g. RCSEd Facial aesthetics course                                               | £785                                      |
| Orthognathic Course e.g. 6 <sup>th</sup> biennial Glasgow course                                              | £495                                      |
| Microvascular Course e.g. University of Liverpool microvascular course                                        | £1400                                     |
| Complex/Advanced Trauma Course inc. condylar fractures and orbital access e.g. SORG course                    | £1500                                     |
| 3 advanced sub-specialty courses:                                                                             |                                           |
| e.g. Establishing a modern salivary gland practice                                                            | £1250                                     |
| e.g. Newcastle functional septorhinoplasty and facial plastics cadaveric course                               | £950                                      |
| e.g. Controversies in the management of head and neck cancer                                                  | £275                                      |
| National or international conference attendance e.g. BAOMS Conference booked as early bird rate as a member * | £200                                      |

1  
2  
3  
4  
5  
6  
7  
8  
9  
10  
11  
12  
13  
14  
15  
16  
17  
18  
19  
20  
21  
22  
23  
24  
25  
26  
27  
28  
29  
30  
31  
32  
33  
34  
35  
36  
37  
38  
39  
40  
41  
42  
43  
44  
45  
46  
47

|                                                                                              |                                                                                           |
|----------------------------------------------------------------------------------------------|-------------------------------------------------------------------------------------------|
| <i>Other</i>                                                                                 |                                                                                           |
| BMA Membership (for 9 years)                                                                 | £113 for FP1 year, £222 per year for FP2-CT2, £329 per year for ST3-5, £443 per year ST6+ |
| RCS subscription fees e.g. RCSEng if complete MRCS at CT2 and FRCS as ST7                    | £316 per year for 4 years as member, £531 for 1 year as fellow                            |
| Specialty Association Membership e.g. British Association of Oral and Maxillofacial Surgeons | £85 per year for 7 years                                                                  |
| Healthcare Protection Organisation (for 9 years) e.g. Medical Defence Union                  | £1325                                                                                     |
| <b>TOTAL ESTIMATE</b>                                                                        | <b>£71431.50</b>                                                                          |

\* Where no minimum number of attendances documented a minimum of 1 included

## Otolaryngology

| Requirements                                                                                      | Cost                                                                                      |
|---------------------------------------------------------------------------------------------------|-------------------------------------------------------------------------------------------|
| <i>Essential for Surgical Training</i>                                                            |                                                                                           |
| JCST fee (for 8 years)                                                                            | £255 per year of surgical training                                                        |
| GMC registration (for 10 years)                                                                   | £200 for FP1 year, £425 per year for FP2+                                                 |
| <i>Mandatory for progression to ST3</i>                                                           |                                                                                           |
| Diploma of Otolaryngology Head and Neck Surgery (DO-HNS)                                          | £932.00                                                                                   |
| <i>Desirable for progression to ST3</i>                                                           |                                                                                           |
| RCSEng Basic Surgical Skills Course (BSS)                                                         | £670.50                                                                                   |
| Advanced Trauma Life Support Course (ATLS)                                                        | £650                                                                                      |
| RCSEng Care of the Critically Ill Surgical Patient Course (CCrISP)                                | £724                                                                                      |
| Advanced Life Support Course                                                                      | £550                                                                                      |
| Advanced Paediatric Life Support Course and 2 x ENT courses                                       | see below                                                                                 |
| <i>Mandatory for CCT</i>                                                                          |                                                                                           |
| FRCS examination (including completion fee)                                                       | £2269                                                                                     |
| Good Clinical Practice Course                                                                     | Free                                                                                      |
| Research Methodology Course                                                                       | Free                                                                                      |
| Training and Education Course e.g. RCSEng Training the Trainers                                   | £702                                                                                      |
| Temporal Bone Dissection Course e.g. Cuschieri Skills Course                                      | £225                                                                                      |
| Sinus Anatomy and Surgical Dissection Course e.g. Cuschieri Skills Course                         | £275                                                                                      |
| Head and Neck Surgery Course (including LASER) e.g. RCSEd Head and Neck Course Module 1 and 2     | £850 and £1050                                                                            |
| Septorhinoplasty and Facial Plastics Surgery Course e.g. NSTC Course                              | £350                                                                                      |
| Advanced Paediatric Life Support Course                                                           | £395                                                                                      |
| National or international conference attendance e.g. BACO Conference booked as an ENT-UK member * | £825                                                                                      |
| <i>Other</i>                                                                                      |                                                                                           |
| BMA Membership (for 10 years)                                                                     | £113 for FP1 year, £222 per year for FP2-CT2, £329 per year for ST3-5, £443 per year ST6+ |
| RCS subscription fees e.g. RCSEng if complete MRCS at CT2 and FRCS as ST8                         | £316 per year for 5 years as member, £531 for 1 year as fellow                            |
| Specialty Association Membership e.g. ENT-UK                                                      | £210 per year for 8 years                                                                 |
| Healthcare Protection Organisation (for 10 years) e.g. Medical Defence Union                      | £1800                                                                                     |
| <b>TOTAL ESTIMATE</b>                                                                             | <b>£25218.50</b>                                                                          |

\* Where no minimum number of attendances documented a minimum of 1 included

## Paediatric Surgery

| Requirements                                                                                                                                       | Cost                                                                                      |
|----------------------------------------------------------------------------------------------------------------------------------------------------|-------------------------------------------------------------------------------------------|
| <i>Essential for Surgical Training</i>                                                                                                             |                                                                                           |
| JCST fee (for 8 years)                                                                                                                             | £255 per year of surgical training                                                        |
| GMC registration (for 10 years)                                                                                                                    | £200 for FP1 year, £425 per year for FP2+                                                 |
| <i>Mandatory for progression to ST3</i>                                                                                                            |                                                                                           |
| MRCS examination                                                                                                                                   | £1425                                                                                     |
| Advanced Paediatric Life Support Course                                                                                                            | £395                                                                                      |
| <i>Desirable for progression to ST3</i>                                                                                                            |                                                                                           |
| RCSEng Basic Surgical Skills Course (BSS)                                                                                                          | £670.50                                                                                   |
| Advanced Trauma Life Support Course (ATLS)                                                                                                         | £650                                                                                      |
| RCSEng Care of the Critically Ill Surgical Patient Course (CCrISP)                                                                                 | £724                                                                                      |
| <i>Mandatory for CCT</i>                                                                                                                           |                                                                                           |
| FRCS examination (including completion fee)                                                                                                        | £2269                                                                                     |
| Good Clinical Practice Course                                                                                                                      | Free                                                                                      |
| Research Methodology Course                                                                                                                        | Free                                                                                      |
| NHS Management Course e.g. BMA management essentials                                                                                               | £354                                                                                      |
| Training and Education Course e.g. RCSEng Training the Trainers                                                                                    | £702                                                                                      |
| ATLS revalidation to keep valid at time of certification                                                                                           | £350                                                                                      |
| National or international conference attendance e.g. British Association of Paediatric Surgeons conference booked as early bird rate as a member * | £150                                                                                      |
| <i>Other</i>                                                                                                                                       |                                                                                           |
| BMA Membership (for 10 years)                                                                                                                      | £113 for FP1 year, £222 per year for FP2-CT2, £329 per year for ST3-5, £443 per year ST6+ |
| RCS subscription fees e.g. RCSEng if complete MRCS at CT2 and FRCS as ST8                                                                          | £316 per year for 5 years as member, £531 for 1 year as fellow                            |
| Specialty Association Membership e.g. British Association of Paediatric Surgeons                                                                   | £110 per year for 8 years                                                                 |
| Healthcare Protection Organisation (for 10 years) e.g. Medical Defence Union                                                                       | £1800                                                                                     |
| <b>TOTAL ESTIMATE</b>                                                                                                                              | <b>£21640.50</b>                                                                          |

\* Where no minimum number of attendances documented a minimum of 1 included

## Plastic Surgery

| Requirements                                                                 | Cost                                                                                      |
|------------------------------------------------------------------------------|-------------------------------------------------------------------------------------------|
| <i>Essential for Surgical Training</i>                                       |                                                                                           |
| JCST fee (for 8 years)                                                       | £255 per year of surgical training                                                        |
| GMC registration (for 10 years)                                              | £200 for FP1 year, £425 per year for FP2+                                                 |
| <i>Mandatory for progression to ST3</i>                                      |                                                                                           |
| MRCS examination                                                             | £1425                                                                                     |
| <i>Desirable for progression to ST3</i>                                      |                                                                                           |
| RCSEng Basic Surgical Skills Course (BSS)                                    | £670.50                                                                                   |
| Advanced Trauma Life Support Course (ATLS)                                   | £650                                                                                      |
| RCSEng Care of the Critically Ill Surgical Patient Course (CCrISP)           | £724                                                                                      |
| <i>Mandatory for CCT</i>                                                     |                                                                                           |
| FRCS examination (including completion fee)                                  | £2269                                                                                     |
| Good Clinical Practice Course                                                | Free                                                                                      |
| Research Methodology Course                                                  | Free                                                                                      |
| Training and Education Course e.g. RCSEng Training the Trainers              | £702                                                                                      |
| Advanced Trauma Life Support Course (ATLS) completed during training         | included above                                                                            |
| <i>Other</i>                                                                 |                                                                                           |
| BMA Membership (for 10 years)                                                | £113 for FP1 year, £222 per year for FP2-CT2, £329 per year for ST3-5, £443 per year ST6+ |
| RCS subscription fees e.g. RCSEng if complete MRCS at CT2 and FRCS as ST8    | £316 per year for 5 years as member, £531 for 1 year as fellow                            |
| Specialty Association Membership e.g. BAPRAS                                 | £150 per year for 7 years (first year membership free)                                    |
| Healthcare Protection Organisation (for 10 years) e.g. Medical Defence Union | £1800                                                                                     |
| <b>TOTAL ESTIMATE</b>                                                        | <b>£20561.50</b>                                                                          |



## Trauma and Orthopaedic Surgery

| Requirements                                                                                                         | Cost                                                                                                                                         |
|----------------------------------------------------------------------------------------------------------------------|----------------------------------------------------------------------------------------------------------------------------------------------|
| <i>Essential for Surgical Training</i>                                                                               |                                                                                                                                              |
| JCST fee (for 8 years)                                                                                               | £255 per year of surgical training                                                                                                           |
| GMC registration (for 10 years)                                                                                      | £200 for FP1 year, £425 per year for FP2+                                                                                                    |
| <i>Mandatory for progression to ST3</i>                                                                              |                                                                                                                                              |
| MRCS examination                                                                                                     | £1425                                                                                                                                        |
| Advanced Trauma Life Support Course (ATLS)                                                                           | £650                                                                                                                                         |
| <i>Desirable for progression to ST3</i>                                                                              |                                                                                                                                              |
| RCSEng Basic Surgical Skills Course (BSS)                                                                            | £670.50                                                                                                                                      |
| RCSEng Care of the Critically Ill Surgical Patient Course (CCrISP)                                                   | £724                                                                                                                                         |
| Basic Course on Fracture Management e.g. RCPSCG principles of casting for orthopaedic trainees                       | £20                                                                                                                                          |
| <i>Mandatory for CCT</i>                                                                                             |                                                                                                                                              |
| FRCS examination (including completion fee)                                                                          | £2269                                                                                                                                        |
| Good Clinical Practice Course                                                                                        | Free                                                                                                                                         |
| Research Methodology Course                                                                                          | Free                                                                                                                                         |
| Training and Education Course e.g. RCSEng Training the Trainers                                                      | £702                                                                                                                                         |
| ATLS revalidation to keep valid at time of certification                                                             | £350                                                                                                                                         |
| National or international conference attendance e.g. British Orthopaedic Association conference booked as a member * | Free                                                                                                                                         |
| <i>Other</i>                                                                                                         |                                                                                                                                              |
| BMA Membership (for 10 years)                                                                                        | £113 for FP1 year, £222 per year for FP2-CT2, £329 per year for ST3-5, £443 per year ST6+                                                    |
| RCS subscription fees e.g. RCSEng if complete MRCS at CT2 and FRCS as ST8                                            | £316 per year for 5 years as member, £531 for 1 year as fellow                                                                               |
| Specialty Association Membership e.g. British Orthopaedic Association                                                | £152 per year for 2 years as CST, £166 per year for 2 years as ST3-4, £204 per year for 2 years as ST5-6, £240 per year for 2 years as ST7-8 |
| Healthcare Protection Organisation (for 10 years) e.g. Medical Defence Union                                         | £1800                                                                                                                                        |
| <b>TOTAL ESTIMATE</b>                                                                                                | <b>£21405.50</b>                                                                                                                             |

\* Where no minimum number of attendances documented a minimum of 1 included

## Urology

| Requirements                                                                                                                                                                    | Cost                                                                                      |
|---------------------------------------------------------------------------------------------------------------------------------------------------------------------------------|-------------------------------------------------------------------------------------------|
| <i>Essential for Surgical Training</i>                                                                                                                                          |                                                                                           |
| JCST fee (for 7 years)                                                                                                                                                          | £255 per year of surgical training                                                        |
| GMC registration (for 9 years)                                                                                                                                                  | £200 for FP1 year, £425 per year for FP2+                                                 |
| <i>Mandatory for progression to ST3</i>                                                                                                                                         |                                                                                           |
| MRCS examination                                                                                                                                                                | £1425                                                                                     |
| <i>Desirable for progression to ST3</i>                                                                                                                                         | £670.50                                                                                   |
| RCSEng Basic Surgical Skills Course (BSS)                                                                                                                                       | £650                                                                                      |
| Advanced Trauma Life Support Course (ATLS)                                                                                                                                      | £724                                                                                      |
| RCSEng Care of the Critically Ill Surgical Patient Course (CCrISP)                                                                                                              |                                                                                           |
| <i>Mandatory for CCT</i>                                                                                                                                                        |                                                                                           |
| FRCS examination (including completion fee)                                                                                                                                     | £2269                                                                                     |
| Good Clinical Practice Course                                                                                                                                                   | Free                                                                                      |
| Research Methodology Course                                                                                                                                                     | Free                                                                                      |
| NHS Management Course e.g. BMA management essentials                                                                                                                            | £354                                                                                      |
| Training and Education Course e.g. RCSEng Training the Trainers                                                                                                                 | £702                                                                                      |
| ATLS revalidation to keep valid at time of certification                                                                                                                        | £350                                                                                      |
| Urodynamics Course e.g. Belfast Training Academy Course                                                                                                                         | £187.50                                                                                   |
| Paediatric Urology Course e.g. BAPU Course                                                                                                                                      | £295                                                                                      |
| Spinal Injuries Course e.g. Princess Royal Spinal Unit Course                                                                                                                   | £450                                                                                      |
| Emergency Urology Course e.g. East of England Emergency Urology Course                                                                                                          | £65                                                                                       |
| Attendance at 1 national or international conference every 2 years of training e.g. British Association of Urological Surgeons Conference booked as early bird rate as a member | £100 per year for 3 years                                                                 |
| <i>Other</i>                                                                                                                                                                    |                                                                                           |
| BMA Membership (for 9 years)                                                                                                                                                    | £113 for FP1 year, £222 per year for FP2-CT2, £329 per year for ST3-5, £443 per year ST6+ |
| RCS subscription fees e.g. RCSEng if complete MRCS at CT2 and FRCS as ST7                                                                                                       | £316 per year for 4 years as member, £531 for 1 year as fellow                            |
| Specialty Association Membership e.g. British Association of Urological Surgeons                                                                                                | £160 per year for 7 years                                                                 |
| Healthcare Protection Organisation (for 9 years) e.g. Medical Defence Union                                                                                                     | £1325                                                                                     |
| <b>TOTAL ESTIMATE</b>                                                                                                                                                           | <b>£20719</b>                                                                             |

## Vascular Surgery

| Requirements                                                                                                                    | Cost                                                                                      |
|---------------------------------------------------------------------------------------------------------------------------------|-------------------------------------------------------------------------------------------|
| <i>Essential for Surgical Training</i>                                                                                          |                                                                                           |
| JCST fee (for 8 years)                                                                                                          | £255 per year of surgical training                                                        |
| GMC registration (for 10 years)                                                                                                 | £200 for FP1 year, £425 per year for FP2+                                                 |
| <i>Mandatory for progression to ST3</i>                                                                                         |                                                                                           |
| MRCS examination                                                                                                                | £1425                                                                                     |
| RCSEng Basic Surgical Skills Course (BSS)                                                                                       | £670.50                                                                                   |
| Advanced Trauma Life Support Course (ATLS)                                                                                      | £650                                                                                      |
| RCSEng Care of the Critically Ill Surgical Patient Course (CCrISP)                                                              | £724                                                                                      |
| <i>Mandatory for CCT</i>                                                                                                        |                                                                                           |
| FRCS examination (including completion fee)                                                                                     | £2269                                                                                     |
| Good Clinical Practice Course                                                                                                   | Free                                                                                      |
| Research Methodology Course                                                                                                     | Free                                                                                      |
| NHS Management Course e.g. BMA management essentials                                                                            | £354                                                                                      |
| Training and Education Course e.g. RCSEng Training the Trainers                                                                 | £702                                                                                      |
| ATLS revalidation to keep valid at time of certification                                                                        | £350                                                                                      |
| National or international conference attendance per year e.g. Vascular Society Conference booked as a member at early bird rate | £375 per year for 8 years                                                                 |
| <i>Other</i>                                                                                                                    |                                                                                           |
| BMA Membership (for 10 years)                                                                                                   | £113 for FP1 year, £222 per year for FP2-CT2, £329 per year for ST3-5, £443 per year ST6+ |
| RCS subscription fees e.g. RCSEng if complete MRCS at CT2 and FRCS as ST7                                                       | £316 per year for 5 years as member, £531 for 1 year as fellow                            |
| Specialty Association Membership e.g. Vascular Society                                                                          | £115 per year for 8 years                                                                 |
| Healthcare Protection Organisation (for 10 years) e.g. Medical Defence Union                                                    | £1800                                                                                     |
| <b>TOTAL ESTIMATE</b>                                                                                                           | <b>£24135.50</b>                                                                          |

# STROBE Statement for A CROSS-SECTIONAL STUDY OF THE FINANCIAL COST OF TRAINING TO THE SURGICAL TRAINEE

|                           | Item No | Recommendation                                                                                                                                                                                                                                                                                                                                                                                                                                                                                                  |
|---------------------------|---------|-----------------------------------------------------------------------------------------------------------------------------------------------------------------------------------------------------------------------------------------------------------------------------------------------------------------------------------------------------------------------------------------------------------------------------------------------------------------------------------------------------------------|
| <b>Title and abstract</b> | 1       | (a) Indicate the study's design with a commonly used term in the title or the abstract<br>PAGE 1<br><input type="checkbox"/>                                                                                                                                                                                                                                                                                                                                                                                    |
|                           |         | (b) Provide in the abstract an informative and balanced summary of what was done and what was found<br>PAGE 2-3<br><input type="checkbox"/>                                                                                                                                                                                                                                                                                                                                                                     |
| <b>Introduction</b>       |         |                                                                                                                                                                                                                                                                                                                                                                                                                                                                                                                 |
| Background/rationale      | 2       | Explain the scientific background and rationale for the investigation being reported<br>PAGE 5-6<br><input type="checkbox"/>                                                                                                                                                                                                                                                                                                                                                                                    |
| Objectives                | 3       | State specific objectives, including any prespecified hypotheses<br>PAGE 6<br><input type="checkbox"/>                                                                                                                                                                                                                                                                                                                                                                                                          |
| <b>Methods</b>            |         |                                                                                                                                                                                                                                                                                                                                                                                                                                                                                                                 |
| Study design              | 4       | Present key elements of study design early in the paper<br>PAGE 7-10<br><input type="checkbox"/>                                                                                                                                                                                                                                                                                                                                                                                                                |
| Setting                   | 5       | Describe the setting, locations, and relevant dates, including periods of recruitment, exposure, follow-up, and data collection<br>PAGE 7-10<br><input type="checkbox"/>                                                                                                                                                                                                                                                                                                                                        |
| Participants              | 6       | (a) <i>Cohort study</i> —Give the eligibility criteria, and the sources and methods of selection of participants. Describe methods of follow-up<br><i>Case-control study</i> —Give the eligibility criteria, and the sources and methods of case ascertainment and control selection. Give the rationale for the choice of cases and controls<br><i>Cross-sectional study</i> —Give the eligibility criteria, and the sources and methods of selection of participants<br>PAGE 7-10<br><input type="checkbox"/> |
|                           |         | (b) <i>Cohort study</i> —For matched studies, give matching criteria and number of exposed and unexposed<br><i>Case-control study</i> —For matched studies, give matching criteria and the number of controls per case                                                                                                                                                                                                                                                                                          |
| Variables                 | 7       | Clearly define all outcomes, exposures, predictors, potential confounders, and effect modifiers. Give diagnostic criteria, if applicable                                                                                                                                                                                                                                                                                                                                                                        |

|                              |    |                                                                                                                                                                                                                                                                                                                                                                                                                                                                                                                                                                                                                                    |
|------------------------------|----|------------------------------------------------------------------------------------------------------------------------------------------------------------------------------------------------------------------------------------------------------------------------------------------------------------------------------------------------------------------------------------------------------------------------------------------------------------------------------------------------------------------------------------------------------------------------------------------------------------------------------------|
|                              |    | PAGE 7-10<br>□                                                                                                                                                                                                                                                                                                                                                                                                                                                                                                                                                                                                                     |
| Data sources/<br>measurement | 8* | For each variable of interest, give sources of data and details of methods of assessment (measurement). Describe comparability of assessment methods if there is more than one group                                                                                                                                                                                                                                                                                                                                                                                                                                               |
| Bias                         | 9  | Describe any efforts to address potential sources of bias<br>PAGE 4, 7-10<br>□                                                                                                                                                                                                                                                                                                                                                                                                                                                                                                                                                     |
| Study size                   | 10 | Explain how the study size was arrived at<br>PAGE 10<br>□                                                                                                                                                                                                                                                                                                                                                                                                                                                                                                                                                                          |
| Quantitative variables       | 11 | Explain how quantitative variables were handled in the analyses. If applicable, describe which groupings were chosen and why<br>PAGE 7-10<br>□                                                                                                                                                                                                                                                                                                                                                                                                                                                                                     |
| Statistical methods          | 12 | (a) Describe all statistical methods, including those used to control for confounding<br>PAGE 10<br>□<br>(b) Describe any methods used to examine subgroups and interactions<br>PAGE 10<br>□<br>(c) Explain how missing data were addressed<br>PAGE 9<br>□<br>(d) <i>Cohort study</i> —If applicable, explain how loss to follow-up was addressed<br><i>Case-control study</i> —If applicable, explain how matching of cases and controls was addressed<br><i>Cross-sectional study</i> —If applicable, describe analytical methods taking account of sampling strategy<br>PAGE 7-10<br>□<br>(e) Describe any sensitivity analyses |

Continued on next page

**Results**

|                   |     |                                                                                                                                                                                                                                                        |
|-------------------|-----|--------------------------------------------------------------------------------------------------------------------------------------------------------------------------------------------------------------------------------------------------------|
| Participants      | 13* | (a) Report numbers of individuals at each stage of study—eg numbers potentially eligible, examined for eligibility, confirmed eligible, included in the study, completing follow-up, and analysed<br>PAGE 10-12<br><input type="checkbox"/>            |
|                   |     | (b) Give reasons for non-participation at each stage<br>PAGE 10-12<br><input type="checkbox"/>                                                                                                                                                         |
|                   |     | (c) Consider use of a flow diagram N/A                                                                                                                                                                                                                 |
| Descriptive data  | 14* | (a) Give characteristics of study participants (eg demographic, clinical, social) and information on exposures and potential confounders<br>PAGE 10-12<br><input type="checkbox"/>                                                                     |
|                   |     | (b) Indicate number of participants with missing data for each variable of interest<br>PAGE 10-13<br><input type="checkbox"/>                                                                                                                          |
|                   |     | (c) <i>Cohort study</i> —Summarise follow-up time (eg, average and total amount)                                                                                                                                                                       |
| Outcome data      | 15* | <i>Cohort study</i> —Report numbers of outcome events or summary measures over time                                                                                                                                                                    |
|                   |     | <i>Case-control study</i> —Report numbers in each exposure category, or summary measures of exposure                                                                                                                                                   |
|                   |     | <i>Cross-sectional study</i> —Report numbers of outcome events or summary measures<br>PAGE 10-13<br><input type="checkbox"/>                                                                                                                           |
| Main results      | 16  | (a) Give unadjusted estimates and, if applicable, confounder-adjusted estimates and their precision (eg, 95% confidence interval). Make clear which confounders were adjusted for and why they were included<br>PAGE 10-13<br><input type="checkbox"/> |
|                   |     | (b) Report category boundaries when continuous variables were categorized<br>PAGE 10-13<br><input type="checkbox"/>                                                                                                                                    |
|                   |     | (c) If relevant, consider translating estimates of relative risk into absolute risk for a meaningful time period                                                                                                                                       |
| Other analyses    | 17  | Report other analyses done—eg analyses of subgroups and interactions, and sensitivity analyses                                                                                                                                                         |
| <b>Discussion</b> |     |                                                                                                                                                                                                                                                        |
| Key results       | 18  | Summarise key results with reference to study objectives<br>PAGE 14-18<br><input type="checkbox"/>                                                                                                                                                     |
| Limitations       | 19  | Discuss limitations of the study, taking into account sources of potential bias or imprecision. Discuss both direction and magnitude of any potential bias<br>PAGE 4<br><input type="checkbox"/>                                                       |
| Interpretation    | 20  | Give a cautious overall interpretation of results considering objectives, limitations, multiplicity of analyses, results from similar studies, and other relevant evidence                                                                             |

|   |                  |                                                                          |
|---|------------------|--------------------------------------------------------------------------|
| 1 |                  |                                                                          |
| 2 |                  | PAGE 14-18                                                               |
| 3 |                  | □                                                                        |
| 4 | Generalisability | 21 Discuss the generalisability (external validity) of the study results |
| 5 |                  | PAGE 14-18                                                               |
| 6 |                  | □                                                                        |
| 7 |                  |                                                                          |

---

#### Other information

---

|    |         |                                                                                                     |
|----|---------|-----------------------------------------------------------------------------------------------------|
| 8  |         |                                                                                                     |
| 9  |         |                                                                                                     |
| 10 | Funding | 22 Give the source of funding and the role of the funders for the present study and, if applicable, |
| 11 |         | for the original study on which the present article is based                                        |
| 12 |         | PAGE 19                                                                                             |
| 13 |         | □                                                                                                   |
| 14 |         |                                                                                                     |

\*Give information separately for cases and controls in case-control studies and, if applicable, for exposed and unexposed groups in cohort and cross-sectional studies.

**Note:** An Explanation and Elaboration article discusses each checklist item and gives methodological background and published examples of transparent reporting. The STROBE checklist is best used in conjunction with this article (freely available on the Web sites of PLoS Medicine at <http://www.plosmedicine.org/>, Annals of Internal Medicine at <http://www.annals.org/>, and Epidemiology at <http://www.epidem.com/>). Information on the STROBE Initiative is available at [www.strobe-statement.org](http://www.strobe-statement.org).

# BMJ Open

## A CROSS-SECTIONAL STUDY OF THE FINANCIAL COST OF TRAINING TO THE SURGICAL TRAINEE IN THE UK AND IRELAND

|                                 |                                                                                                                                                                                                                                                                                                                                                                                                       |
|---------------------------------|-------------------------------------------------------------------------------------------------------------------------------------------------------------------------------------------------------------------------------------------------------------------------------------------------------------------------------------------------------------------------------------------------------|
| Journal:                        | <i>BMJ Open</i>                                                                                                                                                                                                                                                                                                                                                                                       |
| Manuscript ID                   | bmjopen-2017-018086.R2                                                                                                                                                                                                                                                                                                                                                                                |
| Article Type:                   | Research                                                                                                                                                                                                                                                                                                                                                                                              |
| Date Submitted by the Author:   | 12-Sep-2017                                                                                                                                                                                                                                                                                                                                                                                           |
| Complete List of Authors:       | O'Callaghan, John; Association of Surgeons in Training<br>Mohan, Helen; Association of Surgeons in Training<br>Sharrock, Anna ; Association of Surgeons in Training<br>Gokani, Vimal; Association of Surgeons in Training<br>Fitzgerald, J; The Association of Surgeons in Training,<br>Williams, Adam; Association of Surgeons in Training<br>Harries, Rhiannon; Association of Surgeons in Training |
| <b>Primary Subject Heading</b>: | Medical education and training                                                                                                                                                                                                                                                                                                                                                                        |
| Secondary Subject Heading:      | Surgery                                                                                                                                                                                                                                                                                                                                                                                               |
| Keywords:                       | MEDICAL EDUCATION & TRAINING, SURGERY, HEALTH ECONOMICS, surgical training, cost of training, SURGICAL EDUCATION                                                                                                                                                                                                                                                                                      |
|                                 |                                                                                                                                                                                                                                                                                                                                                                                                       |

SCHOLARONE™  
Manuscripts

Only



1  
2  
3 A CROSS-SECTIONAL STUDY OF THE FINANCIAL COST OF TRAINING  
4  
5 TO THE SURGICAL TRAINEE IN THE UK AND IRELAND  
6  
7

8 John M O'Callaghan, Helen M Mohan, Anna E Sharrock, Vimal J Gokani, J Edward Fitzgerald,  
9

10 Adam P Williams, Rhiannon L Harries; on behalf of the Council of the Association of  
11 Surgeons in Training  
12  
13

14  
15 Corresponding author: Rhiannon.harries@doctors.org.uk  
16  
17

18  
19 Address: Association of Surgeons in Training, 35-43 Lincoln's Inn Fields, London WC2A 3PE  
20  
21

22  
23 <http://www.asit.org>  
24

25  
26 <http://twitter.com/ASiTofficial> @ASiTofficial,  
27  
28

29  
30 **Running head:** The cost of surgical training  
31

32  
33 **Category:** Original research  
34  
35

36  
37 **Funding:** Nil  
38  
39

40 **Keywords:** surgical training, cost of training, surgical education, medical  
41 education, health economics  
42  
43  
44

45  
46 **Word count:** 3809  
47  
48  
49  
50  
51  
52  
53  
54  
55  
56  
57  
58  
59  
60

**Abstract****Objectives:**

Applications for surgical training has declined over the last decade and anecdotally, the costs of training at the expense of the surgical trainee are rising. We aimed to quantify the costs surgical trainees are expected to cover for postgraduate training.

**Design:**

Prospective, cross-sectional questionnaire based study.

**Setting/Participants:**

A non-mandatory online questionnaire for UK-based trainees was distributed nationally. A similar national questionnaire was distributed for Ireland, taking into account differences between the healthcare systems. Only fully completed responses were included.

**Results:**

There were 848 and 58 fully completed responses from doctors based in the UK and Ireland, respectively. Medical students in the UK reported a significant increase in debt on graduation by 55% from £17,892 (2000-2004) to £27,655 (2010-2014),  $p < 0.01$ . 41% of specialty trainees in the UK indicated that some or all of their study budget was used to fund mandatory regional teaching. By the end of training, a surgical trainee in the UK spends on average £9,105 on courses, £5,411 on conferences and £4,185 on exams, not covered by training budget. Irish trainees report similarly high costs. Most trainees undertake a higher degree during their postgraduate training. The cost of achieving the mandatory requirements for completion of training ranges between £20,000-£26,000 (dependent on specialty), except oral and maxillofacial surgery, which is considerably higher (£71,431).

**Conclusions:**

Medical students are graduating with significantly larger debt than before. Surgical trainees achieve their educational requirements at substantial personal expenditure. To encourage graduates to pursue and remain in surgical training, urgent action is required to fund the mandatory requirements and annual training costs for completion of training and provide greater transparency to inform doctors of what their postgraduate training costs will be. This is necessary to increase diversity in surgery, reduce debt load and ensure surgery remains a popular career choice.

### Strengths and Limitations of this Study

- This national study provides a large cross-sectional data set on the experience of the costs of surgical training by surgical trainees across all ten surgical specialties in the UK and Ireland
- The costs analysed provided a comprehensive overview of the breadth and depth of financial costs incurred by trainees.
- The wide-distribution of the survey and breadth of responses increased the likelihood that it is representative of trainee experience.
- We recognise that there is a significant number of surveys excluded due to incompleteness, which we believe to be related to the need for accurate costings to complete the survey. However, the overall number of completed responses was higher than required to power the study.
- It is recognised that some costs could be subject to recall bias or an element of selection bias, in that those with significantly more debt may be more likely to respond, however the figures reported are largely consistent with the calculations we have made using the current prices of exams, courses and society memberships to verify the results.

## Introduction

The number of trainees applying for surgical training has declined over the last decade<sup>1</sup>.

Many factors including low workforce morale, poor work-life balance and recent contractual issues may act as a deterrent to medical students considering a career in surgery<sup>2</sup>. The cost of completing the mandatory postgraduate requirements to secure a higher surgical training programme post has been estimated to be between £2,735 and £20,780, dependent on surgical specialty (average £3,360) compared with medicine £2,815 and anaesthetics £2,215<sup>3</sup>. Following entry to higher surgical training, there are considerable ongoing costs incurred by trainees in order to meet the requirements for completion of training as mandated by the Joint Committee on Surgical Training (JCST). These include educational courses, conference attendance, Royal College membership and fellowship examinations and annual subscriptions, and specialty society membership subscriptions. In addition, trainees pay annual expenses such as registration with the respective regulatory bodies, the UK General Medical Council (GMC) or Irish Medical Council (IMC), medical indemnity insurance costs, and the JCST fee (paid by trainees in the UK).

In 2007, The Association of Surgeons in Training (ASiT) conducted a survey of UK surgical trainees, to assess the financial costs to trainees in surgical training<sup>4</sup>. The results demonstrated that the mean debt on qualification from medical school was over £20,000. However, in recent years there have been many new challenges facing the current generation of surgical trainees, including increased student debt, secondary to a rise in annual university tuition fees of up to £9,000 per annum<sup>5</sup>. It has previously been calculated that medical students graduating currently are unlikely to repay their student loan debt before reaching the 30-year point at which it is written off<sup>6</sup>. The salaries of male and female medical graduates diverge such that by the age of 55, the average male medical school

1  
2  
3 graduate earns 35% more<sup>6</sup>. This means that the average female graduate repays more when  
4  
5 debt is low, but a lower amount when debt is high, compared to male graduates<sup>6</sup>. The cost  
6  
7 of living has also increased; in the ten years, preceding November 2016 the UK Consumer  
8  
9 Price Index (CPI) rose a total of 23.8%<sup>7</sup>.

10  
11  
12  
13 To assess the current situation, we repeated a refined study, with a broader remit and more  
14  
15 in depth assessment of cost pressures on trainee surgeons in both the UK and Ireland. The  
16  
17 main aim was to assess the true financial cost of training to the surgical trainee in each of  
18  
19 the ten surgical specialties.  
20  
21  
22  
23  
24  
25  
26  
27  
28  
29  
30  
31  
32  
33  
34  
35  
36  
37  
38  
39  
40  
41  
42  
43  
44  
45  
46  
47  
48  
49  
50  
51  
52  
53  
54  
55  
56  
57  
58  
59  
60

## Methods

### Participants and setting

Postgraduate surgical training in the UK and Ireland consists of a minimum of 8 years of training (except for oral and maxillofacial surgery (OMFS) and urology which is a minimum of 7 years) following completion of the initial post-qualification two-year Foundation Programme (or intern year in Ireland) **Figure 1**. Competitive entry occurs prior to both Core and Higher specialist training levels, except for neurosurgery, cardiothoracic surgery and Oral and maxillofacial surgery (OMFS) in the UK (and trauma and orthopaedics in Scotland), where 'run-through' training (no separate selection process between core and higher specialist training) from Core level exists. Core surgical knowledge is assessed by the Intercollegiate Membership of the Royal College of Surgeons (MRCS) examination and specialty specific knowledge during the later phase of higher surgical training is assessed by the Intercollegiate Fellowship of the Royal College of Surgeons (FRCS) examination.

In the UK and Ireland, the Joint Committee on Surgical Training (JCST) are responsible for curriculum development and quality assurance of all the surgical training programmes in the ten defined surgical specialities (cardiothoracic surgery, general surgery, neurosurgery, OMFS, otolaryngology, paediatric surgery, plastic surgery, trauma and orthopaedics, urology and vascular surgery). All surgical trainees are required to register with the JCST and to pay an annual fee (£255 at time of submission) that has more than doubled between 2010 and 2016. This fee supports the running costs of the JCST to manage trainee enrolment and recommendation for certification; the work of each of the ten surgical specialities 'Specialty Advisory Committee' (SACs); curriculum review and development and website support. The

1  
2  
3 JCST training fee is covered for trainees in Ireland directly by funding received by the RCSI  
4  
5 from the Health Service Executive (HSE).  
6  
7

8  
9 In the UK, Local Education Training Boards (LETBs) provide funding to Local Education  
10  
11 Providers (essentially the hospital where a trainee is employed) to cover the direct costs of  
12  
13 delivering education and training. This sum includes two components: firstly, salary support  
14  
15 of 50% of each doctor's basic salary; the second component is a placement fee of £12,400  
16  
17 per year, per trainee, to fund all costs involved in delivering education and training needs. It  
18  
19 is from this placement fee that trainees apply for study funding support towards courses  
20  
21 and conferences essential to their training, often referred to as 'study leave budget', with a  
22  
23 restricted amount available dependent on the LETB. Funding for military trainees in the UK  
24  
25 regular Defence Medical Services (DMS) is overseen by External Education and Training  
26  
27 Support (EETS) within the Defence Deanery. Funding for training courses for military  
28  
29 trainees is therefore at the discretion of the Defence Consultant Advisor and Defence  
30  
31 Deanery<sup>8</sup>. In Ireland, the RCSI receives funding from HSE to provide surgical training, which  
32  
33 covers the cost of the JCST fee, delivering the curriculum, human factors and operative skills  
34  
35 training days. However, other elements essential for CCT (Certificate of Completion of  
36  
37 Training) are not directly provided. More details of funding for Irish trainees is given in  
38  
39  
40  
41  
42  
43

#### 44 **Appendix 1.**

45  
46  
47 At the time of survey distribution, there were 5,323 surgical trainees in the UK and 438  
48  
49 surgical trainees in Ireland<sup>9</sup>.  
50  
51  
52  
53  
54  
55  
56  
57  
58  
59  
60



### Questionnaire design and distribution

A novel 54-item, survey tool was developed, consisting of free-text, binomial and variable scale responses. The questionnaire was designed with reference to previously published guidelines on conducting questionnaire research<sup>10-12</sup>. The online platform *SurveyMonkey*® (Palo Alto, CA, USA, [www.surveymonkey.com](http://www.surveymonkey.com)) was used to build the survey. All individual question items were compulsory. No individually identifiable information was collected; therefore, non-responders could not be identified for follow-up. No incentives were offered for participation. A link to the online survey was distributed to members of ASiT, surgical specialty associations, and local and national mailing lists of surgical trainees. All surgical trainees in the UK including foundation doctors were included, as appropriate to the level of analysis. A modified version of the survey was circulated to ASiT members and surgical trainees in Ireland, which reflected relevant differences in health systems and training. Interns were excluded from distribution of the survey in Ireland as contact details were only available for those registered as surgical trainees with RCSI. Data collection took place from 2<sup>nd</sup> December 2015 to 26<sup>th</sup> April 2016. The ethical dimensions of this non-mandatory, anonymous evaluation survey were considered and no concerns were identified. Participants consented to the use of the analysis, distribution and publication of anonymised grouped results. A copy of the survey can be found in **Appendix 2**.

This study was undertaken by ASiT (<http://www.asit.org>), a pan-surgical specialty professional body and registered charity in the UK (no: 274841) working to promote excellence in surgical training for the benefit of junior doctors and patients alike. ASiT is

1  
2  
3 independent of the National Health Service (NHS), Surgical Royal Colleges, and specialty  
4  
5 associations.  
6  
7

### 8 **Data analysis**

9  
10  
11 Only fully completed questionnaires were included in the analysis. Due to the differing  
12  
13 healthcare structures and funding systems of postgraduate education and training in UK and  
14  
15 Ireland, a modified version of the survey was used for Ireland and the results are presented  
16  
17 separately. Military trainees were excluded due to low numbers and a separate training  
18  
19 funding structure. Data was graphed and analysed in *Excel*<sup>®</sup> (Microsoft, USA). Significance  
20  
21 testing for continuous variables was conducted using Mann-Whitney U Test in *Stata*<sup>®</sup>  
22  
23 (Statacorp, USA); statistical significance was accepted at  $p < 0.05$ . Survey sample size  
24  
25 calculations were based on standard published formulae and assuming a population of 6000  
26  
27 individuals, with  $\alpha = 0.01$ , 209 responses would be sufficient for margin of error of 0.03<sup>13</sup>.  
28  
29 For readability, all values are presented to the nearest pound (£) or euro (€). We have used  
30  
31 the exchange rate as accessed on 13<sup>th</sup> January 2017 of £0.87 = €1.00 to provide comparisons  
32  
33 between the two currencies<sup>14</sup>. The study results are reported in concordance with STROBE  
34  
35 guidance on observational studies<sup>15</sup>. Results regarding costs are presented displaying  
36  
37 trainees year of graduation in blocks of 5 years to show trends over time.  
38  
39  
40  
41  
42  
43  
44  
45

### 46 **Costs of CCT to the trainee in each surgical speciality**

47  
48  
49 Using guidance available from the JCST, the total cost of achieving the mandatory and  
50  
51 desirable requirements for CCT in each of the surgical specialties was also calculated. Where  
52  
53 conference attendance was mandated, but no exact minimum number described, the cost  
54  
55 of at least one attendance during the training period was calculated. For courses which  
56  
57  
58  
59  
60

1  
2  
3 required re-validation at the end of training, the reduced course cost of re-validation rather  
4  
5 than a full attendance was used. Course costs from recognised bodies, such as the BMA and  
6  
7 Surgical Royal Colleges, were used in all calculations, where applicable. Conference costs  
8  
9 were calculated using the reduced rates available to society members or early registrations  
10  
11 where possible.  
12  
13  
14  
15  
16  
17  
18  
19  
20  
21  
22  
23  
24  
25  
26  
27  
28  
29  
30  
31  
32  
33  
34  
35  
36  
37  
38  
39  
40  
41  
42  
43  
44  
45  
46  
47  
48  
49  
50  
51  
52  
53  
54  
55  
56  
57  
58  
59  
60

For peer review only

## Results

Of 1603 surveys submitted, a total of 868 fully completed responses were included in the analysis from doctors based in the UK, and 58 fully completed responses from doctors based in the Republic of Ireland. Respondent demographics by country of work are detailed in

### Table 1.

#### United Kingdom-specific responses

For the purposes of monetary analysis UK military doctors (n=20) were excluded from the main analysis, however a summary of military doctors' survey findings can be found in **Appendix 3**. This resulted in a total of 848 respondents for analysis. Of 848 respondents, 751 (88%) graduated from medical school in the UK. 89% (672) of these UK medical school graduates graduated with debt, with a mean of £25,404. The average debt by year of graduation has increased by 55% from £17,892 to £27,655 comparing graduates in the most recent generation (2010-2014) with those graduating between 2000 and 2004 (p<0.01)

### Figure 2.

There were 659 specialty trainee respondents from the UK (grades CT/ST1 to ST8) **Table 2**. Of these, 93% (618) responded that they were currently entitled to a study leave budget. The median value was £600 per annum (range £500-£835). Three LETBs reported no defined budget limit (Yorkshire and Humber, South West and Thames Valley). 41% of all respondents in specialty training indicated that some (31% of respondents) or all (10% of respondents), of their study budget was used to fund mandatory regional teaching.

By the end of training, a surgical trainee in the UK can expect to have spent on average £9,105 on courses, £5,411 on conferences and £4,185 on exams (£18,701) that they have

1  
2  
3 not been reimbursed through any source. Expense per year on conferences has marginally  
4  
5 increased from £331 to £414 comparing older graduates with the more recent generation  
6  
7 (2000-2004 versus 2010-2014,  $p=0.28$ ). However, course expenses per year have increased  
8  
9 significantly; the most recent graduates from medical school, graduating in the years 2010-  
10  
11 2014, have spent on average £1,311 per year. This is an increase of 121% on the annual  
12  
13 amount spent by medical school graduates graduating between 2000 and 2004 ( $p<0.01$ )  
14  
15

16  
17 **Figure 3.**  
18

19  
20 400 respondents (47%) from the UK have undertaken a postgraduate degree since  
21  
22 graduating from medical school, with this proportion rising by the later stages of training  
23  
24 (ST7-8 and post-CCT fellow) to 68% (96/141). The average cost of the degree, including  
25  
26 university fees and loss of earnings was estimated by respondents at £18,009; with an  
27  
28 MD/PhD being the most popular higher degree completed (24.8%, mean cost £27,882),  
29  
30 followed by MSc (21.3%, mean cost £11,090).  
31  
32  
33

34  
35 732 respondents from the UK (86%) and 340 of 349 trainees level ST3-ST8 (97%) pay an  
36  
37 annual subscription to one of the four surgical royal colleges (mean £305 for all trainees,  
38  
39 mean £386 for ST3-ST8). 700 respondents (82%) pay annually to their SAC-defined specialty  
40  
41 society (mean £343) and 672 (79%) are members of the British Medical Association. Over  
42  
43 the last year, the mean amount spent on journals was £72 and on textbooks was £212.  
44  
45  
46  
47

48 **Ireland-specific responses**  
49

50 Of the 58 respondents, 57 were currently working in Ireland and one was on fellowship in  
51  
52 the USA **Table 1 and Table 3**. 25 (43%) reported that they were currently entitled to a  
53  
54 training fund **Appendix 1**. In the past year, trainees spent on average £1278 (€1469) on  
55  
56 mandatory courses, including travel expenses to courses, many of which are outside of  
57  
58  
59  
60

1  
2  
3 Ireland, of which a mean of £784 (€902) euros was not reimbursed. Trainees spent a mean  
4  
5 of £1,977 (€2,321) on non-mandatory courses, of which a mean of £1,850 (€2,164) was not  
6  
7 reimbursed. In the past year, respondents had spent a mean of £1,153 (€1,353) on  
8  
9 attending conferences, of which a mean £1,005 (€1,183) was not reimbursed. Since  
10  
11 graduation, across all grades trainees had spent a mean £4,829 (€5,669) on examinations, of  
12  
13 which a mean £3,402 (€4,004) was not reimbursed. For senior trainees (ST8), an average  
14  
15 £9,796 (€11,500) had been spent on exams, of which £5,396 (€6,351) was not reimbursed.  
16  
17

18  
19  
20 47 respondents (n=81%) from Ireland had undertaken a post-graduate degree since  
21  
22 graduating from medical school. The MCh was the most popular post-graduate degree  
23  
24 (n=15, 26%), followed by the MSc (n=13, 22%) and MD (n=11, 19%). The average estimated  
25  
26 total monetary cost of undertaking a postgraduate degree to the trainee, including course  
27  
28 fees and loss of income, was £22,093 (€25,936).  
29  
30  
31

### 32 33 **Estimated costs of training (UK and Ireland) using CCT essential and desirable criteria**

34  
35  
36 The costs range between £20,000 (€23,479) to £26,000 (€30,523) depending on surgical  
37  
38 specialty, except OMFS, which is considerably higher (£71,431 or €83,858) due to the dual  
39  
40 qualification in medicine and dentistry as well as having significantly more mandatory  
41  
42 training courses than other specialties **Appendix 4**.  
43  
44  
45

46  
47 Only the minority of the costs are tax deductible, add to this the estimated cost of a  
48  
49 postgraduate degree (£18,009 or €21,142), which many surgical trainees will also undertake  
50  
51 at their own expense, and the estimated costs to the trainee increase to approximately  
52  
53 £40,000 (€46,958, excluding OMFS).  
54  
55  
56  
57  
58  
59  
60

## Discussion

This study has shown that individual doctors incur many thousands of pounds in personal expense after graduating from medical school to pursue a career as a surgeon and to meet the requirements to complete surgical training. These costs are incurred in addition to the significant debt built up by most medical school graduates, a debt burden likely to rise further as a greater proportion of students graduate under increased student tuition fees in the UK. Many of the costs paid by the trainee towards their training are not recognised as tax deductible, yet are incurred to cover requirements that are essential to progress through training schemes, and therefore to maintain one's livelihood. Consultant surgeons-to-be now spend considerably more per year on courses than in the past, and these now represent the single largest training cost, according to our results. Efforts to make surgery an attractive and inclusive career must include an equitable distribution of training costs to the trainee.

Individual trainees spend significant amounts on courses that are not actually mandatory as documented in CCT requirements. We speculate there are two reasons for this; firstly, surgical trainees will undertake courses above and beyond the minimum requirements to develop their skills. Gaps in knowledge and experience delivered in current training posts are likely to contribute to this, such that simulation courses are necessary to address training needs. As such, issues with training programmes failing to meet trainee's educational needs are instead transferred to trainees, who still obtain this necessary training at their own cost. Secondly, to be competitive for higher surgical training and for consultant posts, trainees may undertake additional courses and extracurricular activities.

1  
2  
3 We have identified a regional variation in what amount is available to trainees, despite the  
4  
5 standardised placement fee from the LETB. Study budgets for specialty trainees were lower  
6  
7 than the values released in response to the recent FOI request by Varley *et al* in 7 out of 10  
8  
9 LETBs (North Central, South and North West London, North West England, East of England,  
10  
11 Kent Surrey and Sussex and North East England), and equal in three LETBs (East Midlands,  
12  
13 Wales, West Midlands)<sup>16</sup>. It is desirable that study budgets are standardised across the UK,  
14  
15 in both amount and that they should not be top-sliced to provide mandatory regional  
16  
17 teaching, and in the longer term all items deemed essential for CCT (including the JCST fee),  
18  
19 should be funded directly, without expense to the trainee. ASiT has previously highlighted  
20  
21 this issue of uncontrolled geographical variation, calling for an equitable approach through  
22  
23 national standardisation<sup>17</sup>.  
24  
25  
26  
27  
28

29  
30 Irish trainees bear similar high costs in surgical training to their UK counterparts, not  
31  
32 surprisingly given that JCST requirements are the same. The higher cost of courses for Irish  
33  
34 trainees may reflect increased travel and accommodation expenses, as many courses  
35  
36 require travel outside of Ireland and the exclusion of Irish interns from the study, who are  
37  
38 less likely to have undertaken expensive technical skills courses. The higher cost of exams  
39  
40 may reflect in part a higher proportion of Irish trainees who undertake USMLE examinations  
41  
42 to pursue a fellowship in the USA, as well as increased travel expenses to intercollegiate  
43  
44 examinations often held in the UK. While funding is available to reimburse some of these  
45  
46 expenses, it falls short of being sufficient to avoid trainees bearing the greatest burden of  
47  
48 the cost. These costs are on top of annual mandatory costs such as membership or  
49  
50 fellowship of RCSI. These are a significant additional cost- for example, the 2016/2017  
51  
52 subscription rate is £315 (€370) for fellows and £226 (€265) for members, and the annual  
53  
54  
55  
56  
57  
58  
59  
60



1  
2  
3 Irish Medical Council(IMC) retention fee (£477 (€560) for those registered for less than 3  
4  
5 years and £515 (€605) for those registered for more than 3 years). Of note, the payment for  
6  
7 the Irish Medical Council (IMC) is an annual payment and cannot be split across the year  
8  
9 which places a significant financial burden on trainees at the time of the year when they  
10  
11 move jobs and incur considerable additional expenses.  
12  
13

14  
15 68% of later stage higher surgical trainees in the UK and 81% of Irish trainees report  
16  
17 obtaining a higher degree. This was associated with an average cost estimated by  
18  
19 respondents of over £18,000 and £22,000 in the UK and Ireland, respectively. Whilst it is not  
20  
21 deemed mandatory by the JCST to undertake a higher degree within surgical training, there  
22  
23 are a number of reasons why surgical trainees choose to undertake one. Firstly, it is  
24  
25 required in order to practice as an academic consultant surgeon, and secondly, a significant  
26  
27 proportion of trainees will undertake one in order to make themselves competitive for  
28  
29 consultant appointment.  
30  
31  
32  
33

34  
35 Doctors need to be aware in advance of what their chosen pathway is likely to cost them,  
36  
37 alongside the starting salary for consultant posts when they complete their training (ranging  
38  
39 from £76,761 in the UK and £95,775 (€105,000) in Ireland<sup>18,19</sup>). This study has provided the  
40  
41 most detailed assessment yet for both UK and Irish surgical trainees. It is difficult to  
42  
43 compare the costs to other medical specialties as few similar studies have been undertaken  
44  
45 in other disciplines. One calculation for the training costs towards the completion of CCT in  
46  
47 Obstetrics and Gynaecology estimated slightly less than for surgical trainees, at £14,224<sup>20</sup>.  
48  
49 Another calculation for only the early stages of training in other specialties was also slightly  
50  
51 less for medicine and anaesthetics, than surgical specialties<sup>3</sup>. Comparisons to other  
52  
53 professional careers, such as solicitors, are also difficult, but working in the private sector  
54  
55  
56  
57  
58  
59  
60

1  
2  
3 has additional benefits. After qualifying with a law degree, solicitors must complete a Legal  
4  
5 Practice Course (LPC), which costs £8,500-£15,000 dependent on type of course and  
6  
7 location<sup>21</sup>. It is however possible to have this cost covered by a law firm if obtaining a  
8  
9 training contract in advance, and many law firms will also provide a living expense grant of  
10  
11 several thousand pounds per year<sup>22</sup>.

12  
13  
14  
15  
16 Research by the University of Kent for the Department of Health has provided cost-  
17  
18 estimates for the training of various doctor grades from the start of medical school  
19  
20 onwards<sup>23</sup>. This work found that the total cost of training a consultant was £564,112, with  
21  
22 some contributions that came largely from the individual (such as undergraduate university  
23  
24 fees, lost earnings, and postgraduate training fees) and others that came predominantly  
25  
26 from the state (clinical placement, tuition and replacement)<sup>23</sup>. It is not possible from the  
27  
28 document to disentangle the values independently contributed by each party.  
29  
30  
31

32  
33 An important consideration frequently overlooked in these analyses relates to the hospital  
34  
35 activity performed by trainees generating hospital income. Doctors in training have a value  
36  
37 as well as a cost, which should be taken into account to offset such cost-estimates. Two UK-  
38  
39 based studies have sought to quantify this within surgical training<sup>24,25</sup>. In general surgery, an  
40  
41 analysis of 1,184 out-patient clinic consultations demonstrated that trainees delivered a  
42  
43 quarter of all out-patient related income, averaging £36,452 per trainee<sup>24</sup>. This was  
44  
45 sufficient to offset 95% of the trainee's average basic salaries. Within ENT surgery, clinical  
46  
47 activity undertaken by SHO grade doctors was calculated to generate an annual net income  
48  
49 of £73,048 (4.3 times higher than their employment costs)<sup>25</sup>. Registrars generated an annual  
50  
51 net income of £121,587 (5.4 times their employment cost). In total, 94% of trainees  
52  
53 included in this analysis generated more hospital income than their employment costs.  
54  
55  
56  
57  
58  
59  
60

1  
2  
3 Given the benefit derived from hospitals from trainee-related clinical activity, it is  
4  
5 reasonable that a proportionate amount of the associated costs of training should be borne  
6  
7 by the employing hospitals.  
8  
9

10  
11 The costs analysed in this study present a comprehensive overview of the breadth and  
12  
13 depth of costs incurred by trainees. The survey was widely distributed across regions,  
14  
15 specialties and grades, increasing the likelihood that it is representative of trainee  
16  
17 experience. Future studies should seek to understand the balance of costs incurred by the  
18  
19 health system in supporting training, which are poorly understood, the influence of training  
20  
21 cost on career choice, and wider international comparisons on the costs of training in  
22  
23 different health systems.  
24  
25  
26  
27  
28  
29  
30  
31  
32  
33  
34  
35  
36  
37  
38  
39  
40  
41  
42  
43  
44  
45  
46  
47  
48  
49  
50  
51  
52  
53  
54  
55  
56  
57  
58  
59  
60

## Conclusions

Medical students are graduating with increasing debt. Surgical trainees achieve their educational requirements through considerable personal expenditure, with a total estimated monetary cost to the trainee in the region of £40,000 (£47,000). The Certificate of Completion of Training in surgical specialties comes with significant costs, which until now have not been accurately estimated. The cost goes far beyond the national training fee paid to the JCST annually in the UK, and greater transparency is immediately necessary to inform doctors of what their postgraduate training costs will be across all specialties. We strongly believe that the costs of mandatory surgical training should be covered by the Local Education and Training Boards, including the JCST fee and the costs of achieving CCT mandatory requirements. Furthermore, funding should be made available for non-mandatory surgical educational activity deemed beneficial by the trainee's educational supervisor, to ensure surgeons are trained to the highest level to provide excellent care. This is necessary to increase diversity in surgery, reduce debt load and make surgery a popular career choice again.

## Acknowledgements

We thank all those trainees who took the time to complete the survey. We acknowledge the work done by Edward Fitzgerald and Charles Giddings on the previous 2007 costs of surgical training survey.

## Contributors

RLH and JEFF conceived the study. All authors designed the questionnaire. JMOC collected the data. JMOC, HMM and RLH analysed the data. All authors were responsible for compiling and editing the manuscript, and approving the final article.

## Competing interests

The authors are either current or previous surgical trainees, and current or past elected members of the Council of the Association of Surgeons in Training (Registered Charity No. 274841). JEFF is an employee of KPMG Global Health Practice, Honorary Clinical Advisor to the Lifebox Foundation charity, and a Trustee of the SURG Foundation research charity. The authors have no other relevant financial or personal conflicts of interest to declare in relation to this paper.

## Funding

This research received no specific grant from any funding agency in the public, commercial or not-for-profit sectors.

## Data sharing statement

1  
2  
3 Summary data is available from the corresponding author at president@asit.org. Consent to  
4  
5 data sharing was sought prior to survey completion, and the presented data are anonymised  
6  
7  
8 grouped, hence risk of individual identification is low.  
9  
10  
11  
12  
13  
14  
15  
16  
17  
18  
19  
20  
21  
22  
23  
24  
25  
26  
27  
28  
29  
30  
31  
32  
33  
34  
35  
36  
37  
38  
39  
40  
41  
42  
43  
44  
45  
46  
47  
48  
49  
50  
51  
52  
53  
54  
55  
56  
57  
58  
59  
60

For peer review only

**Table 1.** Basic Demographics. Respondents divided by country of work.

| Demographic           | United Kingdom            | Ireland               |
|-----------------------|---------------------------|-----------------------|
| Number                | 848                       | 58                    |
| Male: Female (%)      | 518:327 (61.3:38.7, 3 NR) | 35:23 (60:40)         |
| Mean Age (years)      | 31.6 (range 23-55)        | 31.3 (range 25 to 41) |
| LTFT Trainees (%)     | 36 (4.3)                  | 0                     |
| Academic Trainees (%) | 69 (8.1)                  | N/A                   |

*NR= Not Reported, LTFT= Less than full time training*

For peer review only

**Table 2.** Specialty, stage of training and LETB (Local Education and Training Board) for respondents from UK.

| Which specialty do you intend to pursue?                                                                                                                                                                                                                                                                                                              | What is your stage of training?                                                                                                                                                                                                                                                                                                                                                             | In which LETB/Deanery do you work?                                                                                                                                                                                                                                                                                                                                                                                                                                       |
|-------------------------------------------------------------------------------------------------------------------------------------------------------------------------------------------------------------------------------------------------------------------------------------------------------------------------------------------------------|---------------------------------------------------------------------------------------------------------------------------------------------------------------------------------------------------------------------------------------------------------------------------------------------------------------------------------------------------------------------------------------------|--------------------------------------------------------------------------------------------------------------------------------------------------------------------------------------------------------------------------------------------------------------------------------------------------------------------------------------------------------------------------------------------------------------------------------------------------------------------------|
| Cardiothoracic Surgery: 32 (3.8%)<br>General Surgery: 296 (34.9%)<br>Neurosurgery: 28 (3.3%)<br>Oral and Maxillofacial: 19 (2.2%)<br>Otolaryngology: 75 (8.8%)<br>Paediatric Surgery: 29 (3.4%)<br>Plastic Surgery: 66 (7.8%)<br>Trauma and Orthopaedics: 172 (20.3%)<br>Vascular Surgery: 59 (5.4%)<br>Urology: 59 (7.0%)<br>Other/Unsure: 26 (3.1%) | Foundation Year 1: 12 (1.4%)<br>Foundation Year 2: 63 (7.4%)<br>ST1/CT1/SHO1: 148 (17.5%)<br>ST2/CT2/SHO2: 96 (11.3%)<br>CT3/SHO3: 10 (1.2%)<br>ST3/SPR1: 78 (9.2%)<br>ST4/SPR2: 59 (7.0%)<br>ST5/SPR3: 77 (9.1%)<br>ST6/SPR4: 59 (7.0%)<br>ST7/SPR5: 60 (7.1%)<br>ST8/SPR6: 67 (7.9%)<br>Post CCT: 17 (2.0%)<br>Clinical Fellow: 35 (4.1%)<br>Research Post: 53 (6.3%)<br>Other: 14 (1.7%) | Scotland: 70 (8.3%)<br>Northern Ireland: 49 (5.8%)<br>Wales: 51 (6.0%)<br>North East: 42 (5.0%)<br>North West: 80 (9.4%)<br>Yorkshire and Humber: 55 (6.5%)<br>East Midlands: 51 (6.0%)<br>West Midlands: 70 (8.3%)<br>East of England: 61 (7.2%)<br>Thames Valley: 41 (4.8%)<br>Kent, Surrey and Sussex: 41 (4.8%)<br>Wessex: 41 (4.8%)<br>South West: 61 (7.2%)<br>North East and Central London: 43 (5.1%)<br>North West London: 44 (5.2%)<br>South London: 46 (5.4%) |

CT= Core Training, NCE = North Central and East London, SPR= Specialist Registrar, ST= Specialist Training.



**Table 3.** Specialty and stage of training for respondents from Ireland.

| Which specialty do you intend to pursue? | What is your stage of training? |
|------------------------------------------|---------------------------------|
| Cardiothoracic Surgery: 2 (3%)           | ST1/CT1/SHO1: 13 (22%)          |
| General Surgery: 22 (38%)                | ST2/CT2/SHO2: 10 (17%)          |
| Neurosurgery: 1(2%)                      | ST3/SPR1: 12 (21%)              |
| Oral and Maxillofacial: 0                | ST4/SPR2: 5 (9%)                |
| Otolaryngology: 2 (3%)                   | ST5/SPR3: 4 (7%)                |
| Paediatric Surgery: 0                    | ST6/SPR4: 2 (3%)                |
| Plastic Surgery: 3(5%)                   | ST7/SPR5: 1 (2%)                |
| Trauma and Orthopaedics: 20(34%)         | ST8/SPR6: 3 (5%)                |
| Vascular Surgery: 2(3%)                  | Clinical Fellow: 1 (2%)         |
| Urology: 6 (10%)                         | Research Post: 1 (2%)           |

CT= Core Training, SPR= Specialist Registrar, ST= Specialist Training.

## References

1. Joint Committee on Surgical Training National Selection Leads Group, Verbal Communication 2016.
2. Jaunoo SS, King TR, Baker RF, Adama HL. A national survey of reasons why students and junior doctors choose not to pursue a career in surgery. *Annals of the Royal College of Surgeons* 2014;**96 (Suppl)**:192-94
3. Stroman L, Weil S, Butler K, McDonald C. The cost of a number: can you afford to become a surgeon? *The Bulletin of the Royal College of Surgeons of England* 2015;**97(3)**:107-11 doi: 10.1308/147363515x14162390057944[published Online First: Epub Date] | .
4. *The Cost of Surgical Training, Position Statement*. London, UK: Association of Surgeons in Training, 2007.
5. *Student Loans in England: Financial Year 2015-16*. Glasgow, UK: The Student Loans Company, 2016.
6. Ercolani MG, Vohra RS, Carmichael F, Mangat K, Alderson D. The lifetime cost to English students of borrowing to invest in a medical degree: a gender comparison using data from the Office for National Statistics. *BMJ open* 2015;**5(4)**:e007335 doi: 10.1136/bmjopen-2014-007335[published Online First: Epub Date] | .
7. *Statistical bulletin: UK consumer price inflation: Nov 2016*: Office for National Statistics, 2016.
8. *Defence healthcare education and training (DHET)- Applications polic for defence medical services (DMS) external education and training, 4-6-3. 1.2 ed*. Joint Services Publication, 2014.

- 1  
2  
3 9. Joint Committee on Surgical Training and Royal College of Surgeons in Ireland, Verbal  
4  
5 Communication.  
6  
7
- 8  
9 10. Jones TL, Baxter MA, Khanduja V. A quick guide to survey research. Annals of the Royal  
10  
11 College of Surgeons of England 2013;**95**(1):5-7 doi:  
12  
13 10.1308/003588413x13511609956372[published Online First: Epub Date]].  
14
- 15  
16 11. Eysenbach G. Improving the quality of Web surveys: the Checklist for Reporting Results  
17  
18 of Internet E-Surveys (CHERRIES). Journal of medical Internet research 2004;**6**(3):e34 doi:  
19  
20 10.2196/jmir.6.3.e34[published Online First: Epub Date]].  
21  
22
- 23  
24 12. Woodward CA. Questionnaire construction and question writing for research in medical  
25  
26 education. Medical education 1988;**22**(4):345-63  
27
- 28  
29 13. JE B, JW K, CC H. Organizational research: determining appropriate sample size in survey  
30  
31 research. Information Technology, Learning and Performance Journal 2001;**19**(1):43-50  
32  
33
- 34  
35 14. ECB. Euro foreign exchange reference rates: European Central Bank, 2017.  
36
- 37  
38 15. von Elm E, Altman DG, Egger M, Pocock SJ, Gotsche PC, Vandenbroucke JP. The  
39  
40 Strengthening the Reporting of Observational Studies in Epidemiology (STROBE) statement:  
41  
42 guidelines for reporting observational studies. Lancet (London, England)  
43  
44 2007;**370**(9596):1453-7 doi: 10.1016/s0140-6736(07)61602-x[published Online First: Epub  
45  
46 Date]].  
47
- 48  
49 16. Varley I, Kumar A. Cost of training in oral and maxillofacial surgery: beyond the second  
50  
51 degree. The British journal of oral & maxillofacial surgery 2016;**54**(8):956-58 doi:  
52  
53 10.1016/j.bjoms.2016.06.006[published Online First: Epub Date]].  
54  
55
- 56  
57 17. Fitzgerald JE, Giddings CE, Khera G, Marron CD. Improving the future of surgical training  
58  
59  
60

1  
2  
3 and education: consensus recommendations from the Association of Surgeons in Training.

4  
5 International journal of surgery (London, England) 2012;**10**(8):389-92 doi:

6  
7 10.1016/j.ijvsu.2012.03.012[published Online First: Epub Date] |.

8  
9  
10 18. British Medical Association. Pay scales for Consultants. 2017.

11  
12 <https://www.bma.org.uk/advice/employment/pay/consultants-pay-england>

13  
14  
15  
16 19. Health Service Executive. April 1<sup>st</sup> 2017 Revised Consolidated Payscales.

17  
18 <http://www.hse.ie/eng/staff/benefitservices/pay/Consolidated-Payscales-1st-April->

19  
20  
21 2017.pdf

22  
23  
24 20. Orr K, Smith M. The financial burden of specialty training. BMJ Careers

25  
26  
27 2016;**353**(8063):542

28  
29 21. Costs of qualifying. Secondary Costs of qualifying 2017.

30  
31 <http://www.lawsociety.org.uk/law-careers/becoming-a-solicitor/costs-of-qualifying/>.

32  
33  
34 22. TargetJobs- Law. 2017.

35  
36  
37 23. Curtis L, Burns A. Unit costs of health and social care 2016: Personal social services

38  
39  
40 research unit, University of Kent, 2016.

41  
42 24. Fitzgerald JE, Ravindra P, Lepore M, Armstrong A, Bhangu A, Maxwell-Armstrong CA.

43  
44  
45 Financial impact of surgical training on hospital economics: an income analysis of 1184 out-

46  
47 patient clinic consultations. International journal of surgery (London, England)

48  
49 2013;**11**(5):378-82 doi: 10.1016/j.ijvsu.2013.02.017[published Online First: Epub Date] |.

50  
51  
52 25. Clamp PJ, Malpas G, Mason KA, Giddings CE. Surgeons in training – a financial burden or

53  
54  
55 benefit to NHS trusts? Ann R Coll Surg Engl (Suppl) 2011;**93**:22-24

1  
2  
3 **Figure 1.** Stages and years of training for UK doctors training to be consultant surgeons.  
4  
5 Foundation Doctor Year 1 is the first stage following graduation from university/medical  
6  
7 school. In Ireland, the Intern Year is the equivalent of the Foundation Doctor stage in the  
8  
9 UK.  
10

11  
12  
13  
14  
15 **Figure 2.** Mean debt on graduation from medical school, UK medical schools only. Debt has  
16  
17 increased significantly comparing the most recent generation (graduation between 2010  
18  
19 and 2014) with the older generation (graduation between 2000 and 2004),  $p < 0.01$ .  
20  
21  
22  
23  
24  
25

26 **Figure 3.** Mean expense per year on courses and conferences that trainees have not been  
27  
28 reimbursed. Trainees grouped into 5- year generations by year of graduation. Expense on  
29  
30 courses has increased significantly comparing the most recent generation (graduation  
31  
32 between 2010 and 2014) with the older generation (graduation between 2000 and 2004),  
33  
34  $p < 0.01$ . Expense on conferences has not significantly increased ( $p = 0.28$ ). UK medical school  
35  
36 graduates only.  
37  
38  
39  
40  
41  
42  
43  
44  
45  
46  
47  
48  
49  
50  
51  
52  
53  
54  
55  
56  
57  
58  
59  
60



Figure 1. Stages and years of training for UK doctors training to be consultant surgeons. Foundation Doctor Year 1 is the first stage following graduation from university/medical school. In Ireland, the Intern Year is the equivalent of the Foundation Doctor stage in the UK.!! †

44x34mm (300 x 300 DPI)

For peer review only

1  
2  
3  
4  
5  
6  
7  
8  
9  
10  
11  
12  
13  
14  
15  
16  
17  
18  
19  
20  
21  
22  
23  
24  
25  
26  
27  
28  
29  
30  
31  
32  
33  
34  
35  
36  
37  
38  
39  
40  
41  
42  
43  
44  
45  
46  
47  
48  
49  
50  
51  
52  
53  
54  
55  
56  
57  
58  
59  
60



Figure 2. Mean debt on graduation from medical school, UK medical schools only. Debt has increased significantly comparing the most recent generation (graduation between 2010 and 2014) with the older generation (graduation between 2000 and 2004),  $p < 0.01$ .!! †

42x25mm (300 x 300 DPI)

Review only



Figure 3. Mean expense per year on courses and conferences that trainees have not been reimbursed. Trainees grouped into 5- year generations by year of graduation. Expense on courses has increased significantly comparing the most recent generation (graduation between 2010 and 2014) with the older generation (graduation between 2000 and 2004),  $p < 0.01$ . Expense on conferences has not significantly increased ( $p = 0.28$ ). UK medical school graduates only.!! †

43x21mm (300 x 300 DPI)

review only



### Appendix One: Sources of Funding for Higher Surgical Trainees in Ireland

In Ireland, as the RCSI directly administers surgical training in Ireland, it receives funding from the HSE to provide surgical training. This includes covering the cost of the JCST fee and delivering the curriculum, including human factors and operative skills training days. However, other elements essential for CCT such as a leadership course, train the trainers course and good clinical practice are currently not directly provided. There are three funding streams available to trainees on higher specialist training, equivalent to the UK “study budget”- the current funding available to HST trainees are:

1. Mandatory Fund- this is provided by the HSE/NDTP and administered by RCSI. It provides funding of up to 1500 euros for approved mandatory courses while in full-time training in Ireland. This fund does not carry forward year on year and cannot be used if for example, on an overseas fellowship. However, its scope is limited as only approved mandatory courses are funded (1).
2. Specialist training fund- this is a fund of 500 euros per year, which accumulates over the course of HST. It can be used for course fees, equipment costs and books etc. It excludes time spent out of full time training, e.g. on an overseas fellowship (1).
3. There is an additional clinical courses and exams fund, where trainees can claim 450 euros for exams or courses on a definitive list of those deemed relevant to the speciality. This includes a narrow list, for example Advanced Trauma Life Support (ATLS). For exams undertaken outside of Ireland, 650 may be claimed. This is directly administered by the HSE/MET (2). The fund will only cover the cost once per trainee per examination.

At the time of this survey, many trainees would have spent time prior to commencing HST completing courses to make themselves competitive to apply for HST at considerable personal cost. In addition, the range of courses covered by the above list currently excludes many courses undertaken by trainees in their surgical training.

1  
2  
3 It is worth noting that the fund does not adequately cover the cost of courses. For example, the clinical course and examination refund scheme will cover  
4  
5 ATLS if undertaken in Ireland. The current cost of ATLS is 875 euros, but the scheme will only cover 450 euros. This does not include travel and  
6  
7 accommodation costs to regional centres to complete the course. Similarly, for membership and intercollegiate examinations, this fund does not fully cover  
8  
9 the cost, and as these are often held in the UK there are additional travel and accommodation expenses.  
10  
11  
12

13  
14 References Appendix 1:

- 15  
16  
17 1. RCSI Training Funds for SpR Trainees. [http://rcsi.ie/files/surgery/docs/20161019040654\\_Funding-Information-2016.pdf](http://rcsi.ie/files/surgery/docs/20161019040654_Funding-Information-2016.pdf) Accessed 16th January 2017  
18  
19 2. HSE-National Doctors Training and Planning. Specialist Training Fund Guidance Document. July 2016.  
20  
21  
22  
23  
24  
25  
26  
27  
28  
29  
30  
31  
32  
33  
34  
35  
36  
37  
38  
39  
40  
41  
42  
43  
44  
45  
46  
47



## Cost of Surgical Training Survey 2015

### 1. Introduction

**This survey aims to quantify the additional costs incurred by surgeons in training in pursuit of their career goals. It also aims to quantify the availability of study budgets to cover the required courses and other training needs.**

**A similar survey was conducted by ASiT in 2007 and we aim to give some comparison of changes over time.**

**The results will be freely disseminated, including through publication and on the trainee association websites, and provided to Political Leaders, the Royal Colleges, JCST and Specialty Associations.**

**Completion indicates your consent for this analysis, distribution and publication of anonymised, grouped results. Individual responses remain anonymous.**

**This survey is for ALL TRAINEES, REGARDLESS OF SURGICAL SPECIALTY in the UK and Republic of Ireland. Students are not included.**

**It takes approximately 10 minutes to complete.**

**For more information:**

**[www.asit.org](http://www.asit.org)**

**[info@asit.org](mailto:info@asit.org)**

**[@ASiTofficial](#)**





## Cost of Surgical Training Survey 2015

### 2. In which country do you work?

\* 1. Where do you work currently?

- United Kingdom
- Republic of Ireland
- Other

Other (please specify)

er review only

1  
2  
3  
4  
5  
6  
7  
8  
9  
10  
11  
12  
13  
14  
15  
16  
17  
18  
19  
20  
21  
22  
23  
24  
25  
26  
27  
28  
29  
30  
31  
32  
33  
34  
35  
36  
37  
38  
39  
40  
41  
42  
43  
44  
45  
46  
47  
48  
49  
50  
51  
52  
53  
54  
55  
56  
57  
58  
59  
60



Cost of Surgical Training Survey 2015

3. Pay

1 \* 2. What is your current basic salary (without overtime, to the nearest euro)?

2 Please do not enter commas or symbols into any boxes relating to numerical values.

3  
4  
5 To remind you, current payscales are:

6  
7 Intern € 30257

8 Senior House Officer

9 1 € 38839

10 2 € 40998

11 3 € 44224

12 4 € 46334

13 5 € 50578

14 6 € 52687

15 7 € 54746

16 Registrar

17 1 € 50578

18 2 € 52687

19 3 € 54746

20 4 € 56260

21 5 € 58279

22 6 € 60305

23 Senior Registrar

24 1 € 65000

25 2 € 65000

26 3 € 65620

27 4 € 67682

28 5 € 70061

29 6 € 72540

30 7 € 75097

31 Specialist Registrar

32 1 € 60404

33 2 € 61855

34 3 € 63953

35 4 € 65000

36 5 € 66070

37 6 € 68980

38 7 € 71878

39  
40  
41  
42  
43  
44  
45  
46  
47  
48  
49  
50  
51

52  
53 \* 3. What is your current average monthly take home pay after tax (to the nearest euro)?

54  
55

56  
57  
58  
59  
60

1 4. Are you getting paid for your overtime?  
2  
3

4  Yes- rostered only- all of it  
5

6  Yes- rostered only-some of it  
7

8  Yes- rostered and unrostered- all of it  
9

10  Yes-rostered and unrostered- some of it  
11

12  No  
13

14 \* 5. Are you currently entitled to a training fund? (e.g. the SpR mandatory training fund or specialist  
15 training fund?)  
16

17  Yes  
18

19  No  
20  
21  
22  
23  
24  
25  
26  
27  
28  
29  
30  
31  
32  
33  
34  
35  
36  
37  
38  
39  
40  
41  
42  
43  
44  
45  
46  
47  
48  
49  
50  
51  
52  
53  
54  
55  
56  
57  
58  
59  
60

peer review only



## Cost of Surgical Training Survey 2015

### 4. Demographics

\* 6. Are you a military trainee?

Yes

No

7. What is your gender?

Male

Female

\* 8. What is your age? (years)

view only





## Cost of Surgical Training Survey 2015

### 5. Current Post

\* 9. Do you currently hold an academic post?

Yes

No

\* 10. Are you in Less Than Full Time Training?

Yes

No

11. Are you currently on leave?

Yes- Maternity/Paternity leave

Yes- Other leave

No

\* 12. Which specialty do you intend to pursue?

Cardiothoracic surgery

General Surgery

ENT

Neurosurgery

Oral and Maxillofacial surgery

Paediatric Surgery

Plastic Surgery

Trauma and Orthopaedics

Vascular Surgery

Urology

Other (please specify)

1 \* 13. What is your current grade?  
2  
3  
4  
5  
6  
7  
8  
9  
10  
11  
12  
13  
14  
15  
16  
17  
18  
19  
20  
21  
22  
23  
24  
25  
26  
27  
28  
29  
30  
31  
32  
33  
34  
35  
36  
37  
38  
39  
40  
41  
42  
43  
44  
45  
46  
47  
48  
49  
50  
51  
52  
53  
54  
55  
56  
57  
58  
59  
60

- F1 or Intern
- F2
- ST1/CT1/SHO1
- ST2/CT2/SHO2
- CT3/SHO3
- ST3/SpR1
- ST4/SpR2
- ST5/SpR3
- ST6/SpR4
- ST7/SpR5
- ST8/SpR6
- Post CCT
- Clinical Fellow
- Research post with no clinical work
- Research post with part-time clinical work
- Part-time clinical non-training
- Other (please specify)

\* 14. Under which Deanery/Local Education Training Board do you work?

- Republic of Ireland
- NHS Education for Scotland
- Northern Ireland Medical and Dental Training Agency
- Wales Deanery
- Health Education North East
- Health Education North West
- Health Education Yorkshire and the Humber
- Health Education East Midlands
- Health Education West Midlands
- Health Education East of England
- Health Education Thames Valley
- Health Education Kent, Surrey and Sussex
- Health Education Wessex
- Health Education South West
- Health Education North Central and East London
- Health Education North West London
- Health Education South London

ew only



## Cost of Surgical Training Survey 2015

### 6. Current Salary

\* 15. WITHOUT BANDING- What is your current basic salary? (gross, to the nearest pound)

Please do not enter commas or symbols into any boxes relating to numerical values.

To remind you, doctors in training pay scales:

England, Northern Ireland and Wales (Scotland in brackets).

FY1

22636 (23205)

24049 (24654)

25461 (26102)

FY2

28076 (28782)

29912 (30664)

31748 (32546)

Specialty Training

30002 (30605)

31838 (32478)

34402 (35093)

35952 (36675)

37822 (38582)

39693 (40491)

41564 (42399)

43434 (44307)

45304 (46215)

47175 (48123)

1 \* 16. What is your current banding as per your contract?  
2  
3  
4  
5  
6  
7  
8  
9  
10  
11  
12  
13  
14  
15  
16  
17

- 1A  
 1B  
 1C  
 2A  
 2B  
 3  
 Military- no banding recieved  
 Other (please specify)

18  
19  
20

21 \* 17. Are you currently entitled to a study leave budget?  
22  
23  
24  
25  
26  
27  
28  
29

- Yes  
 No  
 Military trainee- funding at discretion of Defence Deanery

30 If yes, please give the approximate value for 12 months (to the nearest pound)  
31  
32  
33  
34  
35  
36  
37  
38  
39  
40  
41  
42  
43  
44  
45  
46  
47  
48  
49  
50  
51  
52  
53  
54  
55  
56  
57  
58  
59  
60

view only



## Cost of Surgical Training Survey 2015

### 7. Debts

\* 18. What year did you qualify from medical school?

\* 19. Where was your medical school?

- UK
- Republic of Ireland
- Other EU
- Outside EU

\* 20. Whilst at medical school have you received any of the following?

- Government student loan
- Military grant
- Bank or other loan
- NHS bursary
- Other bursary
- None of the above

\* 21. If, on qualifying from medical, school you had debt (overdraft, credit cards and all student or professional loans, excluding mortgages) - please estimate the total value at that time (to the nearest pound or euro)

\* 22. Is some or all of your study budget used to fund mandatory regional teaching?

- Some
- All
- None
- Don't know

1  
2  
3  
4  
5  
6  
7  
8  
9  
10  
11  
12  
13  
14  
15  
16  
17  
18  
19  
20  
21  
22  
23  
24  
25  
26  
27  
28  
29  
30  
31  
32  
33  
34  
35  
36  
37  
38  
39  
40  
41  
42  
43  
44  
45  
46  
47  
48  
49  
50  
51  
52  
53  
54  
55  
56  
57  
58  
59  
60

\* 23. How much in total have you have paid for courses out of your own money that was not reimbursed (cumulative over training, to the nearest pound or euro)?

\* 24. How much in total have you paid for conferences out of your own money that was not reimbursed (cumulative over training, to the nearest pound or euro)?

For peer review only



Cost of Surgical Training Survey 2015

8. Expenditures- Course and Exam Attendance

\* 25. During your surgical training please identify which of the following courses or exams you have attended/attempted, and how many times:

|                       | Once                  | Twice                 | 3 x                   | More                  | Never                 |
|-----------------------|-----------------------|-----------------------|-----------------------|-----------------------|-----------------------|
| ALS                   | <input type="radio"/> |
| APaedLS               | <input type="radio"/> |
| ATLS                  | <input type="radio"/> |
| Basic Surgical Skills | <input type="radio"/> |
| CCriSP                | <input type="radio"/> |
| USMLE                 | <input type="radio"/> |
| RCSEng STEP           | <input type="radio"/> |
| MRCS Parts 1&2/A      | <input type="radio"/> |
| MRCS Part 3/B         | <input type="radio"/> |
| DOHNS                 | <input type="radio"/> |
| FRCS Part 1           | <input type="radio"/> |
| FRCS Part 2           | <input type="radio"/> |
| Training the Trainers | <input type="radio"/> |



\* 26. For any of the following courses or exams you attended, did you receive any funding?

|                       | All                   | Part                  | None                  | Not applicable        |
|-----------------------|-----------------------|-----------------------|-----------------------|-----------------------|
| ALS                   | <input type="radio"/> | <input type="radio"/> | <input type="radio"/> | <input type="radio"/> |
| APaedLS               | <input type="radio"/> | <input type="radio"/> | <input type="radio"/> | <input type="radio"/> |
| ATLS                  | <input type="radio"/> | <input type="radio"/> | <input type="radio"/> | <input type="radio"/> |
| Basic Surgical Skills | <input type="radio"/> | <input type="radio"/> | <input type="radio"/> | <input type="radio"/> |
| CCriSP                | <input type="radio"/> | <input type="radio"/> | <input type="radio"/> | <input type="radio"/> |
| USMLE                 | <input type="radio"/> | <input type="radio"/> | <input type="radio"/> | <input type="radio"/> |
| RCSEng STEP           | <input type="radio"/> | <input type="radio"/> | <input type="radio"/> | <input type="radio"/> |
| MRCS Parts 1&2/A      | <input type="radio"/> | <input type="radio"/> | <input type="radio"/> | <input type="radio"/> |
| MRCS Part 3/B         | <input type="radio"/> | <input type="radio"/> | <input type="radio"/> | <input type="radio"/> |
| DOHNS                 | <input type="radio"/> | <input type="radio"/> | <input type="radio"/> | <input type="radio"/> |
| FRCS Part 1           | <input type="radio"/> | <input type="radio"/> | <input type="radio"/> | <input type="radio"/> |
| FRCS Part 2           | <input type="radio"/> | <input type="radio"/> | <input type="radio"/> | <input type="radio"/> |
| Training the Trainers | <input type="radio"/> | <input type="radio"/> | <input type="radio"/> | <input type="radio"/> |

\* 27. In the last year, how much have you spent attending MANDATORY courses (to the nearest pound or euro)?

\* 28. How much of this has been, or will be, reimbursed through your study budget or other funding (to the nearest pound or euro)?

\* 29. In the last year, how much have you spent attending NON-MANDATORY training courses (to the nearest pound or euro)?

\* 30. How much of this has been, or will be, reimbursed through your study budget or other funding (to the nearest pound or euro)?

\* 31. Since graduation from medical school, how much have you spent on registering for, or attending, post-graduate exams (to the nearest pound or euro)?

\* 32. How much of this has been reimbursed through your study budget or other funding (to the nearest pound or euro)?

33. Have you received industry funding to attend any of the following?

|             | No industry funding received | Minor industry funding (under half expenditure) | Major industry funding (over half expenditure) | Completely industry funded |
|-------------|------------------------------|-------------------------------------------------|------------------------------------------------|----------------------------|
| Courses     | <input type="radio"/>        | <input type="radio"/>                           | <input type="radio"/>                          | <input type="radio"/>      |
| Conferences | <input type="radio"/>        | <input type="radio"/>                           | <input type="radio"/>                          | <input type="radio"/>      |
| Exams       | <input type="radio"/>        | <input type="radio"/>                           | <input type="radio"/>                          | <input type="radio"/>      |

Or peer review only



## Cost of Surgical Training Survey 2015

### 9. Expenditures- Conferences, Memberships and Subscriptions

\* 34. In the last year, how much have you spent attending conferences (to the nearest pound or euro)?  
Please include the cost of travel, registration fees and accommodation.

\* 35. How much of this has been, or will be, reimbursed through your study budget or other funding (to the nearest pound or euro)?

\* 36. Have you been refused funding for attending conferences in any of the regions below, for reasons other than your budget has already been used up?

- UK - my deanery
- UK - outside my deanery
- Republic of Ireland
- I have not been refused funding
- Other (please specify)

1 \* 37. Are you a member of any of the following professional bodies or have any other professional fees to  
2 pay?  
3

- 4  General Medical Council or Irish Medical Council  
5  
6  Royal College of Surgeons of Edinburgh  
7  
8  Royal College of Surgeons of England  
9  
10  Royal College of Physicians and Surgeons of Glasgow  
11  
12  Royal College of Surgeons of Ireland  
13  
14  Specialty associations eg ASGBI / SCTS / BOA / ENT-UK / BNS / BAPS / BAOMS / Vascular Society / BAPRAS etc  
15  
16  Sub-specialty associations eg AUGIS / ACPGBI / BRS / ALSGBI / BASO / BTS etc  
17  
18  Trainee associations eg ASiT / BOTA etc  
19  
20  JCST (ISCP training fee)  
21  
22  British Medical Association or Irish Medical Organization  
23  
24  Hospital Consultants and Specialists Association  
25  
26  MDU / MPS / other medical indemnity provider  
27  
28  Royal Society of Medicine  
29  
30  Journal subscriptions  
31  
32  Regional training day fees  
33  
34  Others (please specify)

35

36  
37  
38 \* 38. What is your current annual subscription to your surgical royal college? (to the nearest pound or  
39 euro)  
40

41

42  
43  
44 \* 39. In the last year how much have you spent on specialty society memberships (excluding surgical  
45 royal colleges, to the nearest pound or euro)?  
46

47

48  
49  
50  
51 \* 40. In the last year how much have you spent on journal subscriptions (to the nearest pound or euro)?  
52

53

54  
55  
56 \* 41. In the last year how much have you spent on text books (to the nearest pound or euro)?  
57

58



## Cost of Surgical Training Survey 2015

### 10. Out of Training Fellowships and Postgraduate Degrees

\* 42. Have you undertaken a post-graduate degree since graduating from medical school?

- Yes- MD
- Yes- PhD/DPhil
- Yes- MSc
- Yes- MPhil
- Yes- MEd
- Yes- MA
- Yes- MS/MChir
- No

Yes- Other (please specify)

43. If yes, please estimate the cost of this degree to you personally in monetary terms. Please consider university fees and potential income lost that was not covered by any other funding source.

\* 44. Have you undertaken an overseas or other out-of-training fellowship?

- Yes
- No

45. If, yes, did this negatively impact on your financial situation, please describe.



## Cost of Surgical Training Survey 2015

### 11. Financial Advice

\* 46. Have you previously claimed tax relief from HM Revenue & Customs (or Revenue Tax and customs Ireland/Cain agus Custaim na hEireann) on any of the training and professional costs below? Please select all those that apply.

- GMC or Irish Medical Council
- Surgical Royal College
- MPS/MDU
- BMA or IMO
- Specialty Association
- Journal Subscriptions
- Exam Fees
- JCST
- Courses
- Conferences
- I have not claimed tax relief for any of the professional costs above

\* 47. Do you have, or have you ever consulted an accountant or financial advisor?

- Accountant
- Financial advisor
- Both
- Neither



## Cost of Surgical Training Survey 2015

### 12. The Non-Monetary Costs of Surgical Training

**Nearly there, this is the last page of questions!**

\* 48. How many times have you moved house for work?

- 1
- 2
- 3
- 4
- 5
- 6
- 7
- 8
- 9
- 10
- 11
- 12
- 13
- 14
- 15
- 16 or above

\* 49. With regards to childcare please select one of the following:

- I do not have children
- I have had to pay for weekend childcare to allow me to work
- I have had to pay for evening childcare to allow me to work
- I have had to pay for both evening and weekend childcare to allow me to work
- I have children but have not had to pay for evening or weekend childcare

50. Do you think your surgical training has had a significant cost in terms of any of the following:

|                                            | Yes                   | No                    |
|--------------------------------------------|-----------------------|-----------------------|
| Mental Health                              | <input type="radio"/> | <input type="radio"/> |
| Physical Health                            | <input type="radio"/> | <input type="radio"/> |
| Relationships                              | <input type="radio"/> | <input type="radio"/> |
| Financial Security                         | <input type="radio"/> | <input type="radio"/> |
| Ability to settle down in a permanent home | <input type="radio"/> | <input type="radio"/> |

Other (please specify)

51. Please answer the following questions

|                                                                                                              | Yes                   | No                    | Unsure                |
|--------------------------------------------------------------------------------------------------------------|-----------------------|-----------------------|-----------------------|
| I have missed a major family event due to clinical work                                                      | <input type="radio"/> | <input type="radio"/> | <input type="radio"/> |
| I have missed many family events due to clinical work                                                        | <input type="radio"/> | <input type="radio"/> | <input type="radio"/> |
| I have missed a major family event due to non-clinical work that was necessary for my career progression     | <input type="radio"/> | <input type="radio"/> | <input type="radio"/> |
| I have missed many major family events due to non-clinical work that was necessary for my career progression | <input type="radio"/> | <input type="radio"/> | <input type="radio"/> |
| Staffing levels in my current post impact negatively on my quality of life                                   | <input type="radio"/> | <input type="radio"/> | <input type="radio"/> |
| Rota patterns in my current post impact negatively on my quality of life                                     | <input type="radio"/> | <input type="radio"/> | <input type="radio"/> |

52. Please answer the following questions

|                                                                                                                                                                                                                                           | Yes                   | No                    | Maybe                 |
|-------------------------------------------------------------------------------------------------------------------------------------------------------------------------------------------------------------------------------------------|-----------------------|-----------------------|-----------------------|
| I would support a fixed "training fee", which I would pay annually throughout my training that would cover tuition, courses, exams and fees to professional bodies such as surgical royal colleges, the GMC and one specialty association | <input type="radio"/> | <input type="radio"/> | <input type="radio"/> |
| I would support raising the annual Surgical Royal College Subscription for all MEMBERS AND FELLOWS in order to subsume the costs of the JCST fee                                                                                          | <input type="radio"/> | <input type="radio"/> | <input type="radio"/> |
| I would be happy to fund (up to £500 or 700 euro) a boot-camp in my specialty during core training                                                                                                                                        | <input type="radio"/> | <input type="radio"/> | <input type="radio"/> |
| The cost of surgical training in the UK and Ireland is likely to dissuade me from a career in surgery                                                                                                                                     | <input type="radio"/> | <input type="radio"/> | <input type="radio"/> |
| The cost of training in the UK and Ireland is likely to make me leave medicine altogether                                                                                                                                                 | <input type="radio"/> | <input type="radio"/> | <input type="radio"/> |
| The cost of training in the UK and Ireland is likely to make me leave the UK or Ireland to work as a doctor elsewhere                                                                                                                     | <input type="radio"/> | <input type="radio"/> | <input type="radio"/> |



53. Are there any other comments you would like to make regarding the cost of surgical training, study budgets or any other related matters? Please use the box below.

54. Who do you think should contribute to the cost of surgical training? Please rank the stakeholders below, from most contribution (1), to least (9).

|                          |                      |                                 |
|--------------------------|----------------------|---------------------------------|
| <input type="checkbox"/> | <input type="text"/> | The Government                  |
| <input type="checkbox"/> | <input type="text"/> | NHS Trusts                      |
| <input type="checkbox"/> | <input type="text"/> | Universities                    |
| <input type="checkbox"/> | <input type="text"/> | Private sector providers        |
| <input type="checkbox"/> | <input type="text"/> | Trainees                        |
| <input type="checkbox"/> | <input type="text"/> | Surgical Royal Colleges         |
| <input type="checkbox"/> | <input type="text"/> | Industry                        |
| <input type="checkbox"/> | <input type="text"/> | Surgical specialty associations |

view only

1  
2  
3  
4  
5  
6  
7  
8  
9  
10  
11  
12  
13  
14  
15  
16  
17  
18  
19  
20  
21  
22  
23  
24  
25  
26  
27  
28  
29  
30  
31  
32  
33  
34  
35  
36  
37  
38  
39  
40  
41  
42  
43  
44  
45  
46  
47  
48  
49  
50  
51  
52  
53  
54  
55  
56  
57  
58  
59  
60

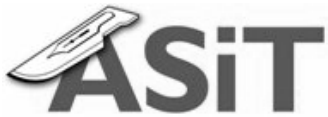

## Cost of Surgical Training Survey 2015

### 13. End of Survey

**Thank you for taking the time to complete this survey, we are very grateful for your responses.**

**The results will be freely disseminated, including through publication and on trainee association websites, and provided to Political Leaders, the Royal Colleges, JCST and Specialty Associations.**

**For more information about the work being undertaken on your behalf, please visit our website, email us or tweet:**

**www.asit.org  
info@asit.org  
@ASiTofficial**

**For more information regarding professional bodies approved for tax relief:**

**<https://www.gov.uk/government/publications/professional-bodies-approved-for-tax-relief-list-3/approved-professional-organisations-and-learned-societies#g>**

Peer review only

### Appendix Three: Results for military trainees

There were 20 military trainee respondents. All 20 graduated from medical school in the UK: 19 (90%) graduated with debt on graduation (mean £18,650). 16 (80%) had a military grant at medical school, 10 (50%) had a government student loan and 4 (20%) had a bank or other loan. The mean amount paid out, that was not reimbursed, for courses was £4250, for conferences £1643, and £2130 for exams. Mean costs per year included surgical royal college subscription (£317), specialty society membership (£336), journals (£79), text books (£245). 7 had completed an MSc (35%), 5 an MD (25%) and 1 (5%) had done both since graduating from medical school (mean cost £12822).

| Which specialty do you intend to pursue?                                                  | What is your stage of training?                                                                                                                                                                                                                                                  |
|-------------------------------------------------------------------------------------------|----------------------------------------------------------------------------------------------------------------------------------------------------------------------------------------------------------------------------------------------------------------------------------|
| General Surgery: 6 (30%)<br>Trauma and Orthopaedics: 6 (30%)<br>Vascular Surgery: 2 (10%) | Foundation Year 1: 1 (5%)<br>Foundation Year 2: 0 (0%)<br>ST1/CT1/SHO1: 4 (20%)<br>ST2/CT2/SHO2: 2 (10%)<br>ST3/SPR1: 1 (5%)<br>ST4/SPR2: 4 (20%)<br>ST5/SPR3: 2 (10%)<br>ST6/SPR4: 1 (5%)<br>ST7/SPR5: 1 (5%)<br>ST8/SPR6: 1 (5%)<br>Post CCT: 1 (5%)<br>Research Post: 2 (10%) |

| Demographic                  | Military Trainees  |
|------------------------------|--------------------|
| <b>Number</b>                | 20                 |
| <b>Male: Female (%)</b>      | 14:6 (70:30%)      |
| <b>Mean Age (years)</b>      | 33.8 (range 27-41) |
| <b>LTFT Trainees (%)</b>     | 0 (0)              |
| <b>Academic Trainees (%)</b> | 1 (5%)             |

#### Appendix Four: Tables of costs to the trainee in each surgical specialty

Using the published requirements for progression through surgical training we have provided an estimated breakdown of the costs to the trainee in each surgical specialty. The following tables of costs assume straight progression through F1-ST8 without taking time out for LTFT, post-graduate degrees or other career breaks. These prices are correct as of November 2016. July 2016 CCT guidance used as per JCST website. Conference costs do not include travel or subsistence.

*BMA= British Medical Association, CCT= Certificate of Completion of Training, CST= Core Surgical Trainee, CT= Core Training (year), FP=Foundation Programme, FRCS= Fellowship of the Royal College of Surgeons, GMC= General Medical Council, HST=Higher Surgical Trainee, JCST= Joint Committee on Surgical Training, MRCS= Membership of the Royal College of Surgeons, RCS= Surgical Royal College, RCSEng= Royal College of Surgeons of England, RCPSCG= Royal College of Physicians and Surgeons of Glasgow, ST= Specialty Trainee (year).*

## Cardiothoracic Surgery

| Requirements                                                                                                                                                   | Cost                                                                                      |
|----------------------------------------------------------------------------------------------------------------------------------------------------------------|-------------------------------------------------------------------------------------------|
| <i>Essential for Surgical Training</i>                                                                                                                         |                                                                                           |
| JCST fee (for 8 years)                                                                                                                                         | £255 per year of surgical training                                                        |
| GMC registration (for 10 years)                                                                                                                                | £200 for FP1 year, £425 per year for FP2+                                                 |
| <i>Mandatory for progression to ST3</i>                                                                                                                        |                                                                                           |
| MRCS examination                                                                                                                                               | £1425                                                                                     |
| <i>Desirable for progression to ST3</i>                                                                                                                        |                                                                                           |
| RCSEng Basic Surgical Skills Course (BSS)                                                                                                                      | £670.50                                                                                   |
| Advanced Trauma Life Support Course (ATLS)                                                                                                                     | £710                                                                                      |
| RCSEng Care of the Critically Ill Surgical Patient Course (CCrISP)                                                                                             | £724                                                                                      |
| RCSEng Specialty Skills in Cardiothoracic Surgery Course                                                                                                       | £774                                                                                      |
| <i>Mandatory for CCT</i>                                                                                                                                       |                                                                                           |
| FRCS examination (including completion fee)                                                                                                                    | £2269                                                                                     |
| Good Clinical Practice Course                                                                                                                                  | Free                                                                                      |
| NHS Management Course e.g. BMA management essentials                                                                                                           | £354                                                                                      |
| Training and Education Course e.g. RCSEng Training the Trainers                                                                                                | £702                                                                                      |
| National or international conference attendance each year of training e.g. Society for Cardiothoracic Surgery conference booked as early bird rate as a member | £205 per year for 2 years as CST, £305 per year for 6 years as HST                        |
| <i>Other</i>                                                                                                                                                   |                                                                                           |
| BMA Membership (for 10 years)                                                                                                                                  | £113 for FP1 year, £222 per year for FP2-CT2, £329 per year for ST3-5, £443 per year ST6+ |
| RCS subscription fees e.g. RCSEng if complete MRCS at CT2 and FRCS as ST8                                                                                      | £316 per year for 5 years as member, £531 for 1 year as fellow                            |
| Specialty Association Membership e.g. Society for Cardiothoracic Surgery                                                                                       | £100 per year for 2 years as CST, £200 per year for 6 years as HST                        |
| Healthcare Protection Organisation (for 10 years) e.g. Medical Defence Union                                                                                   | £1800                                                                                     |
| <b>TOTAL ESTIMATE</b>                                                                                                                                          | <b>£24039.00</b>                                                                          |

## General Surgery

| Requirements                                                                                                                                                                     | Cost                                                                                      |
|----------------------------------------------------------------------------------------------------------------------------------------------------------------------------------|-------------------------------------------------------------------------------------------|
| <i>Essential for Surgical Training</i>                                                                                                                                           |                                                                                           |
| JCST fee (for 8 years)                                                                                                                                                           | £255 per year of surgical training                                                        |
| GMC registration (for 10 years)                                                                                                                                                  | £200 for FP1 year, £425 per year for FP2+                                                 |
| <i>Mandatory for progression to ST3</i>                                                                                                                                          |                                                                                           |
| MRCS examination                                                                                                                                                                 | £1425                                                                                     |
| RCSEng Basic Surgical Skills Course (BSS)                                                                                                                                        | £670.50                                                                                   |
| Advanced Trauma Life Support Course (ATLS)                                                                                                                                       | £650                                                                                      |
| RCSEng Care of the Critically Ill Surgical Patient Course (CCrISP)                                                                                                               | £724                                                                                      |
| <i>Mandatory for CCT</i>                                                                                                                                                         |                                                                                           |
| FRCS examination (and completion fee)                                                                                                                                            | £2269                                                                                     |
| Good Clinical Practice Course                                                                                                                                                    | Free                                                                                      |
| NHS Management Course e.g. BMA management essentials                                                                                                                             | £354                                                                                      |
| Training and Education Course e.g. RCSEng Training the Trainers                                                                                                                  | £702                                                                                      |
| Course relevant to specialist interest e.g. RCSEng specialty skills in coloproctology                                                                                            | £585                                                                                      |
| ATLS revalidation to keep valid at time of certification                                                                                                                         | £350                                                                                      |
| Attendance at 4 national or international conferences during training e.g. Association of Surgeons of Great Britain and Ireland conference booked as early bird rate as a member | £260 per year for 4 years                                                                 |
| <i>Other</i>                                                                                                                                                                     |                                                                                           |
| BMA Membership (for 10 years)                                                                                                                                                    | £113 for FP1 year, £222 per year for FP2-CT2, £329 per year for ST3-5, £443 per year ST6+ |
| RCS subscription fees e.g. RCSEng if complete MRCS at CT2 and FRCS as ST8                                                                                                        | £316 per year for 5 years as member, £531 for 1 year as fellow                            |
| Specialty Association Membership e.g. Association of Surgeons of Great Britain and Ireland                                                                                       | £81 per year for 8 years                                                                  |
| Healthcare Protection Organisation (for 10 years) e.g. Medical Defence Union                                                                                                     | £1800                                                                                     |
| <b>TOTAL ESTIMATE</b>                                                                                                                                                            | <b>£22488.50</b>                                                                          |

## Neurosurgery

| Requirements                                                                                                                                                                    | Cost                                                                                      |
|---------------------------------------------------------------------------------------------------------------------------------------------------------------------------------|-------------------------------------------------------------------------------------------|
| <i>Essential for Surgical Training</i>                                                                                                                                          |                                                                                           |
| JCST fee (for 8 years)                                                                                                                                                          | £255 per year of surgical training                                                        |
| GMC registration (for 10 years)                                                                                                                                                 | £200 for FP1 year, £425 per year for FP2+                                                 |
| <i>Mandatory for progression to ST3</i>                                                                                                                                         |                                                                                           |
| MRCS examination                                                                                                                                                                | £1425.00                                                                                  |
| <i>Desirable for progression to ST3</i>                                                                                                                                         |                                                                                           |
| RCSEng Basic Surgical Skills Course (BSS)                                                                                                                                       | £670.50                                                                                   |
| Advanced Trauma Life Support Course (ATLS)                                                                                                                                      | £650.00                                                                                   |
| RCSEng Care of the Critically Ill Surgical Patient Course (CCriSP)                                                                                                              | £724.00                                                                                   |
| <i>Mandatory for CCT</i>                                                                                                                                                        |                                                                                           |
| FRCS examination (including completion fee)                                                                                                                                     | £2269.00                                                                                  |
| Good Clinical Practice Course                                                                                                                                                   | Free                                                                                      |
| Research Methodology Course                                                                                                                                                     | Free                                                                                      |
| NHS Management Course e.g. BMA management essentials                                                                                                                            | £354.00                                                                                   |
| Training and Education Course e.g. RCSEng Training the Trainers                                                                                                                 | £702.00                                                                                   |
| Advanced Trauma Life Support Course (ATLS) completed during training                                                                                                            | included above                                                                            |
| Attendance at 4 national or international conferences during training e.g. Society of British Neurological Surgeons conference booked as early bird rate as an affiliate member | £150 per year for 4 years                                                                 |
| <i>Other</i>                                                                                                                                                                    |                                                                                           |
| BMA Membership (for 10 years)                                                                                                                                                   | £113 for FP1 year, £222 per year for FP2-CT2, £329 per year for ST3-5, £443 per year ST6+ |
| RCS subscription fees e.g. RCSEng if complete MRCS at CT2 and FRCS as ST8                                                                                                       | £316 per year for 5 years as member, £531 for 1 year as fellow                            |
| Specialty Association Membership e.g. Society of British Neurological Surgeons                                                                                                  | £145 per year for 8 years                                                                 |
| Healthcare Protection Organisation (for 10 years) e.g. Medical Defence Union                                                                                                    | £1800                                                                                     |
| <b>TOTAL ESTIMATE</b>                                                                                                                                                           | <b>£21625.50</b>                                                                          |

### Oral and Maxillofacial Surgery

| Requirements                                                                                                  | Cost                                      |
|---------------------------------------------------------------------------------------------------------------|-------------------------------------------|
| <i>Essential for Surgical Training</i>                                                                        |                                           |
| Bachelor of Dental Surgery e.g. University of Liverpool BDS graduate entry                                    | £9000 for 4 years                         |
| JCST fee (for 7 years)                                                                                        | £255 per year of surgical training        |
| GMC registration (for 9 years)                                                                                | £200 for FP1 year, £425 per year for FP2+ |
| GDC registration (for 9 years)                                                                                | £890 per year                             |
| <i>Mandatory for progression to ST3</i>                                                                       |                                           |
| MRCs examination                                                                                              | £1425                                     |
| <i>Desirable for progression to ST3</i>                                                                       |                                           |
| Advanced Trauma Life Support Course (ATLS)                                                                    | £650                                      |
| RCSEng Care of the Critically Ill Surgical Patient Course (CCrISP)                                            | £724                                      |
| Acute Life-threatening Events Recognition and Treatment (ALERT) Course                                        | £95                                       |
| <i>Mandatory for CCT</i>                                                                                      |                                           |
| FRCS examination (including completion fee)                                                                   | £2269                                     |
| Good Clinical Practice Course                                                                                 | Free                                      |
| Research Methodology Course                                                                                   | Free                                      |
| NHS Management Course e.g. BMA management essentials                                                          | £354                                      |
| Training and Education Course e.g. RCSEng Training the Trainers                                               | £702                                      |
| ATLS revalidation to keep valid at time of certification                                                      | £350                                      |
| Emergency Skills Course e.g. RCSEng Emergency Skills in Oral and Maxillofacial Surgery                        | £877.50                                   |
| Basic Plating Course e.g. AO basic OMFS plating course                                                        | £499                                      |
| Head and Neck Anatomy Course e.g. RCSEng basic surgical anatomy of the head and neck                          | £414                                      |
| Surgical Dermatology Course e.g. RCSEd Facial aesthetics course                                               | £785                                      |
| Orthognathic Course e.g. 6 <sup>th</sup> biennial Glasgow course                                              | £495                                      |
| Microvascular Course e.g. University of Liverpool microvascular course                                        | £1400                                     |
| Complex/Advanced Trauma Course inc. condylar fractures and orbital access e.g. SORG course                    | £1500                                     |
| 3 advanced sub-specialty courses:                                                                             |                                           |
| e.g. Establishing a modern salivary gland practice                                                            | £1250                                     |
| e.g. Newcastle functional septorhinoplasty and facial plastics cadaveric course                               | £950                                      |
| e.g. Controversies in the management of head and neck cancer                                                  | £275                                      |
| National or international conference attendance e.g. BAOMS Conference booked as early bird rate as a member * | £200                                      |



1  
2  
3  
4  
5  
6  
7  
8  
9  
10  
11  
12  
13  
14  
15  
16  
17  
18  
19  
20  
21  
22  
23  
24  
25  
26  
27  
28  
29  
30  
31  
32  
33  
34  
35  
36  
37  
38  
39  
40  
41  
42  
43  
44  
45  
46  
47

|                                                                                              |                                                                                           |
|----------------------------------------------------------------------------------------------|-------------------------------------------------------------------------------------------|
| <i>Other</i>                                                                                 |                                                                                           |
| BMA Membership (for 9 years)                                                                 | £113 for FP1 year, £222 per year for FP2-CT2, £329 per year for ST3-5, £443 per year ST6+ |
| RCS subscription fees e.g. RCSEng if complete MRCS at CT2 and FRCS as ST7                    | £316 per year for 4 years as member, £531 for 1 year as fellow                            |
| Specialty Association Membership e.g. British Association of Oral and Maxillofacial Surgeons | £85 per year for 7 years                                                                  |
| Healthcare Protection Organisation (for 9 years) e.g. Medical Defence Union                  | £1325                                                                                     |
| <b>TOTAL ESTIMATE</b>                                                                        | <b>£71431.50</b>                                                                          |

\* Where no minimum number of attendances documented a minimum of 1 included

## Otolaryngology

| Requirements                                                                                      | Cost                                                                                      |
|---------------------------------------------------------------------------------------------------|-------------------------------------------------------------------------------------------|
| <i>Essential for Surgical Training</i>                                                            |                                                                                           |
| JCST fee (for 8 years)                                                                            | £255 per year of surgical training                                                        |
| GMC registration (for 10 years)                                                                   | £200 for FP1 year, £425 per year for FP2+                                                 |
| <i>Mandatory for progression to ST3</i>                                                           |                                                                                           |
| Diploma of Otolaryngology Head and Neck Surgery (DO-HNS)                                          | £932.00                                                                                   |
| <i>Desirable for progression to ST3</i>                                                           |                                                                                           |
| RCSEng Basic Surgical Skills Course (BSS)                                                         | £670.50                                                                                   |
| Advanced Trauma Life Support Course (ATLS)                                                        | £650                                                                                      |
| RCSEng Care of the Critically Ill Surgical Patient Course (CCrISP)                                | £724                                                                                      |
| Advanced Life Support Course                                                                      | £550                                                                                      |
| Advanced Paediatric Life Support Course and 2 x ENT courses                                       | see below                                                                                 |
| <i>Mandatory for CCT</i>                                                                          |                                                                                           |
| FRCS examination (including completion fee)                                                       | £2269                                                                                     |
| Good Clinical Practice Course                                                                     | Free                                                                                      |
| Research Methodology Course                                                                       | Free                                                                                      |
| Training and Education Course e.g. RCSEng Training the Trainers                                   | £702                                                                                      |
| Temporal Bone Dissection Course e.g. Cuschieri Skills Course                                      | £225                                                                                      |
| Sinus Anatomy and Surgical Dissection Course e.g. Cuschieri Skills Course                         | £275                                                                                      |
| Head and Neck Surgery Course (including LASER) e.g. RCSEd Head and Neck Course Module 1 and 2     | £850 and £1050                                                                            |
| Septorhinoplasty and Facial Plastics Surgery Course e.g. NSTC Course                              | £350                                                                                      |
| Advanced Paediatric Life Support Course                                                           | £395                                                                                      |
| National or international conference attendance e.g. BACO Conference booked as an ENT-UK member * | £825                                                                                      |
| <i>Other</i>                                                                                      |                                                                                           |
| BMA Membership (for 10 years)                                                                     | £113 for FP1 year, £222 per year for FP2-CT2, £329 per year for ST3-5, £443 per year ST6+ |
| RCS subscription fees e.g. RCSEng if complete MRCS at CT2 and FRCS as ST8                         | £316 per year for 5 years as member, £531 for 1 year as fellow                            |
| Specialty Association Membership e.g. ENT-UK                                                      | £210 per year for 8 years                                                                 |
| Healthcare Protection Organisation (for 10 years) e.g. Medical Defence Union                      | £1800                                                                                     |
| <b>TOTAL ESTIMATE</b>                                                                             | <b>£25218.50</b>                                                                          |

\* Where no minimum number of attendances documented a minimum of 1 included

## Paediatric Surgery

| Requirements                                                                                                                                       | Cost                                                                                      |
|----------------------------------------------------------------------------------------------------------------------------------------------------|-------------------------------------------------------------------------------------------|
| <i>Essential for Surgical Training</i>                                                                                                             |                                                                                           |
| JCST fee (for 8 years)                                                                                                                             | £255 per year of surgical training                                                        |
| GMC registration (for 10 years)                                                                                                                    | £200 for FP1 year, £425 per year for FP2+                                                 |
| <i>Mandatory for progression to ST3</i>                                                                                                            |                                                                                           |
| MRCS examination                                                                                                                                   | £1425                                                                                     |
| Advanced Paediatric Life Support Course                                                                                                            | £395                                                                                      |
| <i>Desirable for progression to ST3</i>                                                                                                            |                                                                                           |
| RCSEng Basic Surgical Skills Course (BSS)                                                                                                          | £670.50                                                                                   |
| Advanced Trauma Life Support Course (ATLS)                                                                                                         | £650                                                                                      |
| RCSEng Care of the Critically Ill Surgical Patient Course (CCrISP)                                                                                 | £724                                                                                      |
| <i>Mandatory for CCT</i>                                                                                                                           |                                                                                           |
| FRCS examination (including completion fee)                                                                                                        | £2269                                                                                     |
| Good Clinical Practice Course                                                                                                                      | Free                                                                                      |
| Research Methodology Course                                                                                                                        | Free                                                                                      |
| NHS Management Course e.g. BMA management essentials                                                                                               | £354                                                                                      |
| Training and Education Course e.g. RCSEng Training the Trainers                                                                                    | £702                                                                                      |
| ATLS revalidation to keep valid at time of certification                                                                                           | £350                                                                                      |
| National or international conference attendance e.g. British Association of Paediatric Surgeons conference booked as early bird rate as a member * | £150                                                                                      |
| <i>Other</i>                                                                                                                                       |                                                                                           |
| BMA Membership (for 10 years)                                                                                                                      | £113 for FP1 year, £222 per year for FP2-CT2, £329 per year for ST3-5, £443 per year ST6+ |
| RCS subscription fees e.g. RCSEng if complete MRCS at CT2 and FRCS as ST8                                                                          | £316 per year for 5 years as member, £531 for 1 year as fellow                            |
| Specialty Association Membership e.g. British Association of Paediatric Surgeons                                                                   | £110 per year for 8 years                                                                 |
| Healthcare Protection Organisation (for 10 years) e.g. Medical Defence Union                                                                       | £1800                                                                                     |
| <b>TOTAL ESTIMATE</b>                                                                                                                              | <b>£21640.50</b>                                                                          |

\* Where no minimum number of attendances documented a minimum of 1 included

## Plastic Surgery

| Requirements                                                                 | Cost                                                                                      |
|------------------------------------------------------------------------------|-------------------------------------------------------------------------------------------|
| <i>Essential for Surgical Training</i>                                       |                                                                                           |
| JCST fee (for 8 years)                                                       | £255 per year of surgical training                                                        |
| GMC registration (for 10 years)                                              | £200 for FP1 year, £425 per year for FP2+                                                 |
| <i>Mandatory for progression to ST3</i>                                      |                                                                                           |
| MRCS examination                                                             | £1425                                                                                     |
| <i>Desirable for progression to ST3</i>                                      |                                                                                           |
| RCSEng Basic Surgical Skills Course (BSS)                                    | £670.50                                                                                   |
| Advanced Trauma Life Support Course (ATLS)                                   | £650                                                                                      |
| RCSEng Care of the Critically Ill Surgical Patient Course (CCrISP)           | £724                                                                                      |
| <i>Mandatory for CCT</i>                                                     |                                                                                           |
| FRCS examination (including completion fee)                                  | £2269                                                                                     |
| Good Clinical Practice Course                                                | Free                                                                                      |
| Research Methodology Course                                                  | Free                                                                                      |
| Training and Education Course e.g. RCSEng Training the Trainers              | £702                                                                                      |
| Advanced Trauma Life Support Course (ATLS) completed during training         | included above                                                                            |
| <i>Other</i>                                                                 |                                                                                           |
| BMA Membership (for 10 years)                                                | £113 for FP1 year, £222 per year for FP2-CT2, £329 per year for ST3-5, £443 per year ST6+ |
| RCS subscription fees e.g. RCSEng if complete MRCS at CT2 and FRCS as ST8    | £316 per year for 5 years as member, £531 for 1 year as fellow                            |
| Specialty Association Membership e.g. BAPRAS                                 | £150 per year for 7 years (first year membership free)                                    |
| Healthcare Protection Organisation (for 10 years) e.g. Medical Defence Union | £1800                                                                                     |
| <b>TOTAL ESTIMATE</b>                                                        | <b>£20561.50</b>                                                                          |

## Trauma and Orthopaedic Surgery

| Requirements                                                                                                         | Cost                                                                                                                                         |
|----------------------------------------------------------------------------------------------------------------------|----------------------------------------------------------------------------------------------------------------------------------------------|
| <i>Essential for Surgical Training</i>                                                                               |                                                                                                                                              |
| JCST fee (for 8 years)                                                                                               | £255 per year of surgical training                                                                                                           |
| GMC registration (for 10 years)                                                                                      | £200 for FP1 year, £425 per year for FP2+                                                                                                    |
| <i>Mandatory for progression to ST3</i>                                                                              |                                                                                                                                              |
| MRCS examination                                                                                                     | £1425                                                                                                                                        |
| Advanced Trauma Life Support Course (ATLS)                                                                           | £650                                                                                                                                         |
| <i>Desirable for progression to ST3</i>                                                                              |                                                                                                                                              |
| RCSEng Basic Surgical Skills Course (BSS)                                                                            | £670.50                                                                                                                                      |
| RCSEng Care of the Critically Ill Surgical Patient Course (CCrISP)                                                   | £724                                                                                                                                         |
| Basic Course on Fracture Management e.g. RCPSCG principles of casting for orthopaedic trainees                       | £20                                                                                                                                          |
| <i>Mandatory for CCT</i>                                                                                             |                                                                                                                                              |
| FRCS examination (including completion fee)                                                                          | £2269                                                                                                                                        |
| Good Clinical Practice Course                                                                                        | Free                                                                                                                                         |
| Research Methodology Course                                                                                          | Free                                                                                                                                         |
| Training and Education Course e.g. RCSEng Training the Trainers                                                      | £702                                                                                                                                         |
| ATLS revalidation to keep valid at time of certification                                                             | £350                                                                                                                                         |
| National or international conference attendance e.g. British Orthopaedic Association conference booked as a member * | Free                                                                                                                                         |
| <i>Other</i>                                                                                                         |                                                                                                                                              |
| BMA Membership (for 10 years)                                                                                        | £113 for FP1 year, £222 per year for FP2-CT2, £329 per year for ST3-5, £443 per year ST6+                                                    |
| RCS subscription fees e.g. RCSEng if complete MRCS at CT2 and FRCS as ST8                                            | £316 per year for 5 years as member, £531 for 1 year as fellow                                                                               |
| Specialty Association Membership e.g. British Orthopaedic Association                                                | £152 per year for 2 years as CST, £166 per year for 2 years as ST3-4, £204 per year for 2 years as ST5-6, £240 per year for 2 years as ST7-8 |
| Healthcare Protection Organisation (for 10 years) e.g. Medical Defence Union                                         | £1800                                                                                                                                        |
| <b>TOTAL ESTIMATE</b>                                                                                                | <b>£21405.50</b>                                                                                                                             |

\* Where no minimum number of attendances documented a minimum of 1 included

## Urology

| Requirements                                                                                                                                                                    | Cost                                                                                      |
|---------------------------------------------------------------------------------------------------------------------------------------------------------------------------------|-------------------------------------------------------------------------------------------|
| <i>Essential for Surgical Training</i>                                                                                                                                          |                                                                                           |
| JCST fee (for 7 years)                                                                                                                                                          | £255 per year of surgical training                                                        |
| GMC registration (for 9 years)                                                                                                                                                  | £200 for FP1 year, £425 per year for FP2+                                                 |
| <i>Mandatory for progression to ST3</i>                                                                                                                                         |                                                                                           |
| MRCS examination                                                                                                                                                                | £1425                                                                                     |
| <i>Desirable for progression to ST3</i>                                                                                                                                         | £670.50                                                                                   |
| RCSEng Basic Surgical Skills Course (BSS)                                                                                                                                       | £650                                                                                      |
| Advanced Trauma Life Support Course (ATLS)                                                                                                                                      | £724                                                                                      |
| RCSEng Care of the Critically Ill Surgical Patient Course (CCrISP)                                                                                                              |                                                                                           |
| <i>Mandatory for CCT</i>                                                                                                                                                        |                                                                                           |
| FRCS examination (including completion fee)                                                                                                                                     | £2269                                                                                     |
| Good Clinical Practice Course                                                                                                                                                   | Free                                                                                      |
| Research Methodology Course                                                                                                                                                     | Free                                                                                      |
| NHS Management Course e.g. BMA management essentials                                                                                                                            | £354                                                                                      |
| Training and Education Course e.g. RCSEng Training the Trainers                                                                                                                 | £702                                                                                      |
| ATLS revalidation to keep valid at time of certification                                                                                                                        | £350                                                                                      |
| Urodynamics Course e.g. Belfast Training Academy Course                                                                                                                         | £187.50                                                                                   |
| Paediatric Urology Course e.g. BAPU Course                                                                                                                                      | £295                                                                                      |
| Spinal Injuries Course e.g. Princess Royal Spinal Unit Course                                                                                                                   | £450                                                                                      |
| Emergency Urology Course e.g. East of England Emergency Urology Course                                                                                                          | £65                                                                                       |
| Attendance at 1 national or international conference every 2 years of training e.g. British Association of Urological Surgeons Conference booked as early bird rate as a member | £100 per year for 3 years                                                                 |
| <i>Other</i>                                                                                                                                                                    |                                                                                           |
| BMA Membership (for 9 years)                                                                                                                                                    | £113 for FP1 year, £222 per year for FP2-CT2, £329 per year for ST3-5, £443 per year ST6+ |
| RCS subscription fees e.g. RCSEng if complete MRCS at CT2 and FRCS as ST7                                                                                                       | £316 per year for 4 years as member, £531 for 1 year as fellow                            |
| Specialty Association Membership e.g. British Association of Urological Surgeons                                                                                                | £160 per year for 7 years                                                                 |
| Healthcare Protection Organisation (for 9 years) e.g. Medical Defence Union                                                                                                     | £1325                                                                                     |
| <b>TOTAL ESTIMATE</b>                                                                                                                                                           | <b>£20719</b>                                                                             |

## Vascular Surgery

| Requirements                                                                                                                    | Cost                                                                                      |
|---------------------------------------------------------------------------------------------------------------------------------|-------------------------------------------------------------------------------------------|
| <i>Essential for Surgical Training</i>                                                                                          |                                                                                           |
| JCST fee (for 8 years)                                                                                                          | £255 per year of surgical training                                                        |
| GMC registration (for 10 years)                                                                                                 | £200 for FP1 year, £425 per year for FP2+                                                 |
| <i>Mandatory for progression to ST3</i>                                                                                         |                                                                                           |
| MRCS examination                                                                                                                | £1425                                                                                     |
| RCSEng Basic Surgical Skills Course (BSS)                                                                                       | £670.50                                                                                   |
| Advanced Trauma Life Support Course (ATLS)                                                                                      | £650                                                                                      |
| RCSEng Care of the Critically Ill Surgical Patient Course (CCrISP)                                                              | £724                                                                                      |
| <i>Mandatory for CCT</i>                                                                                                        |                                                                                           |
| FRCS examination (including completion fee)                                                                                     | £2269                                                                                     |
| Good Clinical Practice Course                                                                                                   | Free                                                                                      |
| Research Methodology Course                                                                                                     | Free                                                                                      |
| NHS Management Course e.g. BMA management essentials                                                                            | £354                                                                                      |
| Training and Education Course e.g. RCSEng Training the Trainers                                                                 | £702                                                                                      |
| ATLS revalidation to keep valid at time of certification                                                                        | £350                                                                                      |
| National or international conference attendance per year e.g. Vascular Society Conference booked as a member at early bird rate | £375 per year for 8 years                                                                 |
| <i>Other</i>                                                                                                                    |                                                                                           |
| BMA Membership (for 10 years)                                                                                                   | £113 for FP1 year, £222 per year for FP2-CT2, £329 per year for ST3-5, £443 per year ST6+ |
| RCS subscription fees e.g. RCSEng if complete MRCS at CT2 and FRCS as ST7                                                       | £316 per year for 5 years as member, £531 for 1 year as fellow                            |
| Specialty Association Membership e.g. Vascular Society                                                                          | £115 per year for 8 years                                                                 |
| Healthcare Protection Organisation (for 10 years) e.g. Medical Defence Union                                                    | £1800                                                                                     |
| <b>TOTAL ESTIMATE</b>                                                                                                           | <b>£24135.50</b>                                                                          |

# STROBE Statement for A CROSS-SECTIONAL STUDY OF THE FINANCIAL COST OF TRAINING TO THE SURGICAL TRAINEE

|                           | Item No | Recommendation                                                                                                                                                                                                                                                                                                                                                                                                                                                                                                                                                                                                                                                                                                                            |
|---------------------------|---------|-------------------------------------------------------------------------------------------------------------------------------------------------------------------------------------------------------------------------------------------------------------------------------------------------------------------------------------------------------------------------------------------------------------------------------------------------------------------------------------------------------------------------------------------------------------------------------------------------------------------------------------------------------------------------------------------------------------------------------------------|
| <b>Title and abstract</b> | 1       | (a) Indicate the study's design with a commonly used term in the title or the abstract<br>PAGE 1<br><input type="checkbox"/>                                                                                                                                                                                                                                                                                                                                                                                                                                                                                                                                                                                                              |
|                           |         | (b) Provide in the abstract an informative and balanced summary of what was done and what was found<br>PAGE 2-3<br><input type="checkbox"/>                                                                                                                                                                                                                                                                                                                                                                                                                                                                                                                                                                                               |
| <b>Introduction</b>       |         |                                                                                                                                                                                                                                                                                                                                                                                                                                                                                                                                                                                                                                                                                                                                           |
| Background/rationale      | 2       | Explain the scientific background and rationale for the investigation being reported<br>PAGE 5-6<br><input type="checkbox"/>                                                                                                                                                                                                                                                                                                                                                                                                                                                                                                                                                                                                              |
| Objectives                | 3       | State specific objectives, including any prespecified hypotheses<br>PAGE 6<br><input type="checkbox"/>                                                                                                                                                                                                                                                                                                                                                                                                                                                                                                                                                                                                                                    |
| <b>Methods</b>            |         |                                                                                                                                                                                                                                                                                                                                                                                                                                                                                                                                                                                                                                                                                                                                           |
| Study design              | 4       | Present key elements of study design early in the paper<br>PAGE 7-10<br><input type="checkbox"/>                                                                                                                                                                                                                                                                                                                                                                                                                                                                                                                                                                                                                                          |
| Setting                   | 5       | Describe the setting, locations, and relevant dates, including periods of recruitment, exposure, follow-up, and data collection<br>PAGE 7-10<br><input type="checkbox"/>                                                                                                                                                                                                                                                                                                                                                                                                                                                                                                                                                                  |
| Participants              | 6       | (a) <i>Cohort study</i> —Give the eligibility criteria, and the sources and methods of selection of participants. Describe methods of follow-up<br><i>Case-control study</i> —Give the eligibility criteria, and the sources and methods of case ascertainment and control selection. Give the rationale for the choice of cases and controls<br><i>Cross-sectional study</i> —Give the eligibility criteria, and the sources and methods of selection of participants<br>PAGE 7-10<br><input type="checkbox"/><br>(b) <i>Cohort study</i> —For matched studies, give matching criteria and number of exposed and unexposed<br><i>Case-control study</i> —For matched studies, give matching criteria and the number of controls per case |
| Variables                 | 7       | Clearly define all outcomes, exposures, predictors, potential confounders, and effect modifiers. Give diagnostic criteria, if applicable                                                                                                                                                                                                                                                                                                                                                                                                                                                                                                                                                                                                  |



|                              |    |                                                                                                                                                                                                                                                                                                                                                                                                                                                                                                                                                                                                                                    |
|------------------------------|----|------------------------------------------------------------------------------------------------------------------------------------------------------------------------------------------------------------------------------------------------------------------------------------------------------------------------------------------------------------------------------------------------------------------------------------------------------------------------------------------------------------------------------------------------------------------------------------------------------------------------------------|
|                              |    | PAGE 7-10<br>□                                                                                                                                                                                                                                                                                                                                                                                                                                                                                                                                                                                                                     |
| Data sources/<br>measurement | 8* | For each variable of interest, give sources of data and details of methods of assessment (measurement). Describe comparability of assessment methods if there is more than one group                                                                                                                                                                                                                                                                                                                                                                                                                                               |
| Bias                         | 9  | Describe any efforts to address potential sources of bias<br>PAGE 4, 7-10<br>□                                                                                                                                                                                                                                                                                                                                                                                                                                                                                                                                                     |
| Study size                   | 10 | Explain how the study size was arrived at<br>PAGE 10<br>□                                                                                                                                                                                                                                                                                                                                                                                                                                                                                                                                                                          |
| Quantitative variables       | 11 | Explain how quantitative variables were handled in the analyses. If applicable, describe which groupings were chosen and why<br>PAGE 7-10<br>□                                                                                                                                                                                                                                                                                                                                                                                                                                                                                     |
| Statistical methods          | 12 | (a) Describe all statistical methods, including those used to control for confounding<br>PAGE 10<br>□<br>(b) Describe any methods used to examine subgroups and interactions<br>PAGE 10<br>□<br>(c) Explain how missing data were addressed<br>PAGE 9<br>□<br>(d) <i>Cohort study</i> —If applicable, explain how loss to follow-up was addressed<br><i>Case-control study</i> —If applicable, explain how matching of cases and controls was addressed<br><i>Cross-sectional study</i> —If applicable, describe analytical methods taking account of sampling strategy<br>PAGE 7-10<br>□<br>(e) Describe any sensitivity analyses |

Continued on next page

**Results**

|                   |     |                                                                                                                                                                                                                                                                                                                             |
|-------------------|-----|-----------------------------------------------------------------------------------------------------------------------------------------------------------------------------------------------------------------------------------------------------------------------------------------------------------------------------|
| Participants      | 13* | (a) Report numbers of individuals at each stage of study—eg numbers potentially eligible, examined for eligibility, confirmed eligible, included in the study, completing follow-up, and analysed<br>PAGE 10-12<br><input type="checkbox"/>                                                                                 |
|                   |     | (b) Give reasons for non-participation at each stage<br>PAGE 10-12<br><input type="checkbox"/>                                                                                                                                                                                                                              |
|                   |     | (c) Consider use of a flow diagram N/A                                                                                                                                                                                                                                                                                      |
| Descriptive data  | 14* | (a) Give characteristics of study participants (eg demographic, clinical, social) and information on exposures and potential confounders<br>PAGE 10-12<br><input type="checkbox"/>                                                                                                                                          |
|                   |     | (b) Indicate number of participants with missing data for each variable of interest<br>PAGE 10-13<br><input type="checkbox"/>                                                                                                                                                                                               |
|                   |     | (c) <i>Cohort study</i> —Summarise follow-up time (eg, average and total amount)                                                                                                                                                                                                                                            |
| Outcome data      | 15* | <i>Cohort study</i> —Report numbers of outcome events or summary measures over time<br><i>Case-control study</i> —Report numbers in each exposure category, or summary measures of exposure<br><i>Cross-sectional study</i> —Report numbers of outcome events or summary measures<br>PAGE 10-13<br><input type="checkbox"/> |
| Main results      | 16  | (a) Give unadjusted estimates and, if applicable, confounder-adjusted estimates and their precision (eg, 95% confidence interval). Make clear which confounders were adjusted for and why they were included<br>PAGE 10-13<br><input type="checkbox"/>                                                                      |
|                   |     | (b) Report category boundaries when continuous variables were categorized<br>PAGE 10-13<br><input type="checkbox"/>                                                                                                                                                                                                         |
|                   |     | (c) If relevant, consider translating estimates of relative risk into absolute risk for a meaningful time period                                                                                                                                                                                                            |
| Other analyses    | 17  | Report other analyses done—eg analyses of subgroups and interactions, and sensitivity analyses                                                                                                                                                                                                                              |
| <b>Discussion</b> |     |                                                                                                                                                                                                                                                                                                                             |
| Key results       | 18  | Summarise key results with reference to study objectives<br>PAGE 14-18<br><input type="checkbox"/>                                                                                                                                                                                                                          |
| Limitations       | 19  | Discuss limitations of the study, taking into account sources of potential bias or imprecision. Discuss both direction and magnitude of any potential bias<br>PAGE 4<br><input type="checkbox"/>                                                                                                                            |
| Interpretation    | 20  | Give a cautious overall interpretation of results considering objectives, limitations, multiplicity of analyses, results from similar studies, and other relevant evidence                                                                                                                                                  |

|   |                  |                                                                          |
|---|------------------|--------------------------------------------------------------------------|
| 1 |                  |                                                                          |
| 2 |                  | PAGE 14-18                                                               |
| 3 |                  | □                                                                        |
| 4 | Generalisability | 21 Discuss the generalisability (external validity) of the study results |
| 5 |                  | PAGE 14-18                                                               |
| 6 |                  | □                                                                        |
| 7 |                  |                                                                          |

---

#### Other information

---

|    |         |                                                                                                                                                                  |
|----|---------|------------------------------------------------------------------------------------------------------------------------------------------------------------------|
| 8  |         |                                                                                                                                                                  |
| 9  | Funding | 22 Give the source of funding and the role of the funders for the present study and, if applicable, for the original study on which the present article is based |
| 10 |         | PAGE 19                                                                                                                                                          |
| 11 |         | □                                                                                                                                                                |
| 12 |         |                                                                                                                                                                  |
| 13 |         |                                                                                                                                                                  |
| 14 |         |                                                                                                                                                                  |

\*Give information separately for cases and controls in case-control studies and, if applicable, for exposed and unexposed groups in cohort and cross-sectional studies.

**Note:** An Explanation and Elaboration article discusses each checklist item and gives methodological background and published examples of transparent reporting. The STROBE checklist is best used in conjunction with this article (freely available on the Web sites of PLoS Medicine at <http://www.plosmedicine.org/>, Annals of Internal Medicine at <http://www.annals.org/>, and Epidemiology at <http://www.epidem.com/>). Information on the STROBE Initiative is available at [www.strobe-statement.org](http://www.strobe-statement.org).

# BMJ Open

## A CROSS-SECTIONAL STUDY OF THE FINANCIAL COST OF TRAINING TO THE SURGICAL TRAINEE IN THE UK AND IRELAND

|                                 |                                                                                                                                                                                                                                                                                                                                                                                                       |
|---------------------------------|-------------------------------------------------------------------------------------------------------------------------------------------------------------------------------------------------------------------------------------------------------------------------------------------------------------------------------------------------------------------------------------------------------|
| Journal:                        | <i>BMJ Open</i>                                                                                                                                                                                                                                                                                                                                                                                       |
| Manuscript ID                   | bmjopen-2017-018086.R3                                                                                                                                                                                                                                                                                                                                                                                |
| Article Type:                   | Research                                                                                                                                                                                                                                                                                                                                                                                              |
| Date Submitted by the Author:   | 23-Sep-2017                                                                                                                                                                                                                                                                                                                                                                                           |
| Complete List of Authors:       | O'Callaghan, John; Association of Surgeons in Training<br>Mohan, Helen; Association of Surgeons in Training<br>Sharrock, Anna ; Association of Surgeons in Training<br>Gokani, Vimal; Association of Surgeons in Training<br>Fitzgerald, J; The Association of Surgeons in Training,<br>Williams, Adam; Association of Surgeons in Training<br>Harries, Rhiannon; Association of Surgeons in Training |
| <b>Primary Subject Heading</b>: | Medical education and training                                                                                                                                                                                                                                                                                                                                                                        |
| Secondary Subject Heading:      | Surgery                                                                                                                                                                                                                                                                                                                                                                                               |
| Keywords:                       | MEDICAL EDUCATION & TRAINING, SURGERY, HEALTH ECONOMICS, surgical training, cost of training, SURGICAL EDUCATION                                                                                                                                                                                                                                                                                      |
|                                 |                                                                                                                                                                                                                                                                                                                                                                                                       |

SCHOLARONE™  
Manuscripts

Only

1  
2  
3 A CROSS-SECTIONAL STUDY OF THE FINANCIAL COST OF TRAINING  
4  
5 TO THE SURGICAL TRAINEE IN THE UK AND IRELAND  
6  
7

8 John M O'Callaghan, Helen M Mohan, Anna E Sharrock, Vimal J Gokani, J Edward Fitzgerald,  
9

10 Adam P Williams, Rhiannon L Harries; on behalf of the Council of the Association of  
11 Surgeons in Training  
12  
13

14  
15 Corresponding author: Rhiannon.harries@doctors.org.uk  
16  
17

18  
19 Address: Association of Surgeons in Training, 35-43 Lincoln's Inn Fields, London WC2A 3PE  
20  
21

22  
23 <http://www.asit.org>  
24

25  
26 <http://twitter.com/ASiTofficial> @ASiTofficial,  
27  
28

29  
30 **Running head:** The cost of surgical training  
31

32  
33 **Category:** Original research  
34  
35

36  
37 **Funding:** Nil  
38  
39

40 **Keywords:** surgical training, cost of training, surgical education, medical  
41 education, health economics  
42  
43

44  
45 **Word count:** 3951  
46  
47  
48  
49  
50  
51  
52  
53  
54  
55  
56  
57  
58  
59  
60

**Abstract****Objectives:**

Applications for surgical training has declined over the last decade and anecdotally, the costs of training at the expense of the surgical trainee are rising. We aimed to quantify the costs surgical trainees are expected to cover for postgraduate training.

**Design:**

Prospective, cross-sectional questionnaire based study.

**Setting/Participants:**

A non-mandatory online questionnaire for UK-based trainees was distributed nationally. A similar national questionnaire was distributed for Ireland, taking into account differences between the healthcare systems. Only fully completed responses were included.

**Results:**

There were 848 and 58 fully completed responses from doctors based in the UK and Ireland, respectively. Medical students in the UK reported a significant increase in debt on graduation by 55% from £17,892 (2000-2004) to £27,655 (2010-2014),  $p < 0.01$ . 41% of specialty trainees in the UK indicated that some or all of their study budget was used to fund mandatory regional teaching. By the end of training, a surgical trainee in the UK spends on average £9,105 on courses, £5,411 on conferences and £4,185 on exams, not covered by training budget. Irish trainees report similarly high costs. Most trainees undertake a higher degree during their postgraduate training. The cost of achieving the mandatory requirements for completion of training ranges between £20,000-£26,000 (dependent on specialty), except oral and maxillofacial surgery, which is considerably higher (£71,431).

**Conclusions:**

Medical students are graduating with significantly larger debt than before. Surgical trainees achieve their educational requirements at substantial personal expenditure. To encourage graduates to pursue and remain in surgical training, urgent action is required to fund the mandatory requirements and annual training costs for completion of training and provide greater transparency to inform doctors of what their postgraduate training costs will be. This is necessary to increase diversity in surgery, reduce debt load and ensure surgery remains a popular career choice.

### Strengths and Limitations of this Study

- This national study provides a large cross-sectional data set on the experience of the costs of surgical training by surgical trainees across all ten surgical specialties in the UK and Ireland
- The costs analysed provided a comprehensive overview of the breadth and depth of financial costs incurred by trainees.
- The wide-distribution of the survey and breadth of responses increased the likelihood that it is representative of trainee experience.
- We recognise that there is a significant number of surveys excluded due to incompleteness, which we believe to be related to the need for accurate costings to complete the survey. However, the overall number of completed responses was higher than required to power the study.
- It is recognised that some costs could be subject to recall bias or an element of selection bias, in that those with significantly more debt may be more likely to respond, however the figures reported are largely consistent with the calculations we have made using the current prices of exams, courses and society memberships to verify the results.



## Introduction

The number of trainees applying for surgical training has declined over the last decade<sup>1</sup>.

Many factors including low workforce morale, poor work-life balance and recent contractual issues may act as a deterrent to medical students considering a career in surgery<sup>2</sup>. The cost of completing the mandatory postgraduate requirements to secure a higher surgical training programme post has been estimated to be between £2,735 and £20,780, dependent on surgical specialty (average £3,360) compared with medicine £2,815 and anaesthetics £2,215<sup>3</sup>. Following entry to higher surgical training, there are considerable ongoing costs incurred by trainees in order to meet the requirements for completion of training as mandated by the Joint Committee on Surgical Training (JCST). These include educational courses, conference attendance, Royal College membership and fellowship examinations and annual subscriptions, and specialty society membership subscriptions. In addition, trainees pay annual expenses such as registration with the respective regulatory bodies, the UK General Medical Council (GMC) or Irish Medical Council (IMC), medical indemnity insurance costs, and the JCST fee (paid by trainees in the UK).

In 2007, The Association of Surgeons in Training (ASiT) conducted a survey of UK surgical trainees, to assess the financial costs to trainees in surgical training<sup>4</sup>. The results demonstrated that the mean debt on qualification from medical school was over £20,000. However, in recent years there have been many new challenges facing the current generation of surgical trainees, including increased student debt, secondary to a rise in annual university tuition fees of up to £9,000 per annum<sup>5</sup>. It has previously been calculated that medical students graduating currently are unlikely to repay their student loan debt before reaching the 30-year point at which it is written off<sup>6</sup>. The salaries of male and female medical graduates diverge such that by the age of 55, the average male medical school

1  
2  
3 graduate earns 35% more<sup>6</sup>. This means that the average female graduate repays more when  
4  
5 debt is low, but a lower amount when debt is high, compared to male graduates<sup>6</sup>. The cost  
6  
7 of living has also increased; in the ten years, preceding November 2016 the UK Consumer  
8  
9 Price Index (CPI) rose a total of 23.8%<sup>7</sup>.

10  
11  
12  
13 To assess the current situation, we repeated a refined study, with a broader remit and more  
14  
15 in depth assessment of cost pressures on trainee surgeons in both the UK and Ireland. The  
16  
17 main aim was to assess the true financial cost of training to the surgical trainee in each of  
18  
19 the ten surgical specialties.  
20  
21  
22  
23  
24  
25  
26  
27  
28  
29  
30  
31  
32  
33  
34  
35  
36  
37  
38  
39  
40  
41  
42  
43  
44  
45  
46  
47  
48  
49  
50  
51  
52  
53  
54  
55  
56  
57  
58  
59  
60

## Methods

### Participants and setting

Postgraduate surgical training in the UK and Ireland consists of a minimum of 8 years of training (except for oral and maxillofacial surgery (OMFS) and urology which is a minimum of 7 years) following completion of the initial post-qualification two-year Foundation Programme (or intern year in Ireland) **Figure 1**. Competitive entry occurs prior to both Core and Higher specialist training levels, except for neurosurgery, cardiothoracic surgery and Oral and maxillofacial surgery (OMFS) in the UK (and trauma and orthopaedics in Scotland), where 'run-through' training (no separate selection process between core and higher specialist training) from Core level exists. Core surgical knowledge is assessed by the Intercollegiate Membership of the Royal College of Surgeons (MRCS) examination and specialty specific knowledge during the later phase of higher surgical training is assessed by the Intercollegiate Fellowship of the Royal College of Surgeons (FRCS) examination.

In the UK and Ireland, the Joint Committee on Surgical Training (JCST) are responsible for curriculum development and quality assurance of all the surgical training programmes in the ten defined surgical specialities (cardiothoracic surgery, general surgery, neurosurgery, OMFS, otolaryngology, paediatric surgery, plastic surgery, trauma and orthopaedics, urology and vascular surgery). All surgical trainees are required to register with the JCST and to pay an annual fee (£255 at time of submission) that has more than doubled between 2010 and 2016. This fee supports the running costs of the JCST to manage trainee enrolment and recommendation for certification; the work of each of the ten surgical specialities 'Specialty Advisory Committee' (SACs); curriculum review and development and website support. The

1  
2  
3 JCST training fee is covered for trainees in Ireland directly by funding received by the RCSI  
4  
5 from the Health Service Executive (HSE).  
6  
7

8  
9 In the UK, Local Education Training Boards (LETBs) provide funding to Local Education  
10  
11 Providers (essentially the hospital where a trainee is employed) to cover the direct costs of  
12  
13 delivering education and training. This sum includes two components: firstly, salary support  
14  
15 of 50% of each doctor's basic salary; the second component is a placement fee of £12,400  
16  
17 per year, per trainee, to fund all costs involved in delivering education and training needs. It  
18  
19 is from this placement fee that trainees apply for study funding support towards courses  
20  
21 and conferences essential to their training, often referred to as 'study leave budget', with a  
22  
23 restricted amount available dependent on the LETB. Funding for military trainees in the UK  
24  
25 regular Defence Medical Services (DMS) is overseen by External Education and Training  
26  
27 Support (EETS) within the Defence Deanery. Funding for training courses for military  
28  
29 trainees is therefore at the discretion of the Defence Consultant Advisor and Defence  
30  
31 Deanery<sup>8</sup>. In Ireland, the RCSI receives funding from HSE to provide surgical training, which  
32  
33 covers the cost of the JCST fee, delivering the curriculum, human factors and operative skills  
34  
35 training days. However, other elements essential for CCT (Certificate of Completion of  
36  
37 Training) are not directly provided. More details of funding for Irish trainees is given in  
38  
39  
40  
41  
42  
43

#### 44 **Appendix 1.**

45  
46  
47 At the time of survey distribution, there were 5,323 surgical trainees in the UK and 438  
48  
49 surgical trainees in Ireland<sup>9</sup>.  
50  
51  
52  
53  
54  
55  
56  
57  
58  
59  
60

### Questionnaire design and distribution

A novel 54-item, survey tool was developed, consisting of free-text, binomial and variable scale responses. The questionnaire was designed with reference to previously published guidelines on conducting questionnaire research<sup>10-12</sup>. The online platform *SurveyMonkey*® (Palo Alto, CA, USA, [www.surveymonkey.com](http://www.surveymonkey.com)) was used to build the survey. All individual question items were compulsory. No individually identifiable information was collected; therefore, non-responders could not be identified for follow-up. No incentives were offered for participation. A link to the online survey was distributed to members of ASiT, surgical specialty associations, and local and national mailing lists of surgical trainees. All surgical trainees in the UK including foundation doctors were included, as appropriate to the level of analysis. A modified version of the survey was circulated to ASiT members and surgical trainees in Ireland, which reflected relevant differences in health systems and training. Interns were excluded from distribution of the survey in Ireland as contact details were only available for those registered as surgical trainees with RCSI. Data collection took place from 2<sup>nd</sup> December 2015 to 26<sup>th</sup> April 2016. The ethical dimensions of this non-mandatory, anonymous evaluation survey were considered and no concerns were identified. Participants consented to the use of the analysis, distribution and publication of anonymised grouped results. A copy of the survey can be found in **Appendix 2**.

This study was undertaken by ASiT (<http://www.asit.org>), a pan-surgical specialty professional body and registered charity in the UK (no: 274841) working to promote excellence in surgical training for the benefit of junior doctors and patients alike. ASiT is

1  
2  
3 independent of the National Health Service (NHS), Surgical Royal Colleges, and specialty  
4  
5 associations.  
6  
7

### 8 **Data analysis**

9  
10  
11 Only fully completed questionnaires were included in the analysis. Due to the differing  
12  
13 healthcare structures and funding systems of postgraduate education and training in UK and  
14  
15 Ireland, a modified version of the survey was used for Ireland and the results are presented  
16  
17 separately. Military trainees were excluded due to low numbers and a separate training  
18  
19 funding structure. Data was graphed and analysed in *Excel*<sup>®</sup> (Microsoft, USA). Significance  
20  
21 testing for continuous variables was conducted using Mann-Whitney U Test in *Stata*<sup>®</sup>  
22  
23 (Statacorp, USA); statistical significance was accepted at  $p < 0.05$ . Survey sample size  
24  
25 calculations were based on standard published formulae and assuming a population of 6000  
26  
27 individuals, with  $\alpha = 0.01$ , 209 responses would be sufficient for margin of error of 0.03<sup>13</sup>.  
28  
29 For readability, all values are presented to the nearest pound (£) or euro (€). We have used  
30  
31 the exchange rate as accessed on 13<sup>th</sup> January 2017 of £0.87 = €1.00 to provide comparisons  
32  
33 between the two currencies<sup>14</sup>. The study results are reported in concordance with STROBE  
34  
35 guidance on observational studies<sup>15</sup>. Results regarding costs are presented displaying  
36  
37 trainees year of graduation in blocks of 5 years to show trends over time.  
38  
39  
40  
41  
42  
43  
44  
45

### 46 **Costs of CCT to the trainee in each surgical speciality**

47  
48  
49 Using guidance available from the JCST, the total cost of achieving the mandatory and  
50  
51 desirable requirements for CCT in each of the surgical specialties was also calculated. Where  
52  
53 conference attendance was mandated, but no exact minimum number described, the cost  
54  
55 of at least one attendance during the training period was calculated. For courses which  
56  
57  
58  
59  
60

1  
2  
3 required re-validation at the end of training, the reduced course cost of re-validation rather  
4  
5 than a full attendance was used. Course costs from recognised bodies, such as the BMA and  
6  
7 Surgical Royal Colleges, were used in all calculations, where applicable. Conference costs  
8  
9 were calculated using the reduced rates available to society members or early registrations  
10  
11 where possible.  
12  
13  
14  
15  
16  
17  
18  
19  
20  
21  
22  
23  
24  
25  
26  
27  
28  
29  
30  
31  
32  
33  
34  
35  
36  
37  
38  
39  
40  
41  
42  
43  
44  
45  
46  
47  
48  
49  
50  
51  
52  
53  
54  
55  
56  
57  
58  
59  
60

For peer review only

## Results

Of 1603 surveys submitted, a total of 868 fully completed responses were included in the analysis from doctors based in the UK, and 58 fully completed responses from doctors based in the Republic of Ireland. Respondent demographics by country of work are detailed in

### Table 1.

#### United Kingdom-specific responses

For the purposes of monetary analysis UK military doctors (n=20) were excluded from the main analysis, however a summary of military doctors' survey findings can be found in **Appendix 3**. This resulted in a total of 848 respondents for analysis. Of 848 respondents, 751 (88%) graduated from medical school in the UK. 89% (672) of these UK medical school graduates graduated with debt, with a mean of £25,404. The average debt by year of graduation has increased by 55% from £17,892 to £27,655 comparing graduates in the most recent generation (2010-2014) with those graduating between 2000 and 2004 (p<0.01)

### Figure 2.

There were 659 specialty trainee respondents from the UK (grades CT/ST1 to ST8) **Table 2**. Of these, 93% (618) responded that they were currently entitled to a study leave budget. The median value was £600 per annum (range £500-£835). Three LETBs reported no defined budget limit (Yorkshire and Humber, South West and Thames Valley). 41% of all respondents in specialty training indicated that some (31% of respondents) or all (10% of respondents), of their study budget was used to fund mandatory regional teaching.

By the end of training, a surgical trainee in the UK can expect to have spent on average £9,105 on courses, £5,411 on conferences and £4,185 on exams (£18,701) that they have



1  
2  
3 not been reimbursed through any source. Expense per year on conferences has marginally  
4  
5 increased from £331 to £414 comparing older graduates with the more recent generation  
6  
7 (2000-2004 versus 2010-2014,  $p=0.28$ ). However, course expenses per year have increased  
8  
9 significantly; the most recent graduates from medical school, graduating in the years 2010-  
10  
11 2014, have spent on average £1,311 per year. This is an increase of 121% on the annual  
12  
13 amount spent by medical school graduates graduating between 2000 and 2004 ( $p<0.01$ )  
14  
15

16  
17 **Figure 3.**  
18

19  
20 400 respondents (47%) from the UK have undertaken a postgraduate degree since  
21  
22 graduating from medical school, with this proportion rising by the later stages of training  
23  
24 (ST7-8 and post-CCT fellow) to 68% (96/141). The average cost of the degree, including  
25  
26 university fees and loss of earnings was estimated by respondents at £18,009; with an  
27  
28 MD/PhD being the most popular higher degree completed (24.8%, mean cost £27,882),  
29  
30 followed by MSc (21.3%, mean cost £11,090).  
31  
32  
33

34  
35 732 respondents from the UK (86%) and 340 of 349 trainees level ST3-ST8 (97%) pay an  
36  
37 annual subscription to one of the four surgical royal colleges (mean £305 for all trainees,  
38  
39 mean £386 for ST3-ST8). 700 respondents (82%) pay annually to their SAC-defined specialty  
40  
41 society (mean £343) and 672 (79%) are members of the British Medical Association. Over  
42  
43 the last year, the mean amount spent on journals was £72 and on textbooks was £212.  
44  
45  
46  
47

48 **Ireland-specific responses**  
49

50 Of the 58 respondents, 57 were currently working in Ireland and one was on fellowship in  
51  
52 the USA **Table 1 and Table 3**. 25 (43%) reported that they were currently entitled to a  
53  
54 training fund **Appendix 1**. In the past year, trainees spent on average £1278 (€1469) on  
55  
56 mandatory courses, including travel expenses to courses, many of which are outside of  
57  
58  
59  
60

1  
2  
3 Ireland, of which a mean of £784 (€902) euros was not reimbursed. Trainees spent a mean  
4  
5 of £1,977 (€2,321) on non-mandatory courses, of which a mean of £1,850 (€2,164) was not  
6  
7 reimbursed. In the past year, respondents had spent a mean of £1,153 (€1,353) on  
8  
9 attending conferences, of which a mean £1,005 (€1,183) was not reimbursed. Since  
10  
11 graduation, across all grades trainees had spent a mean £4,829 (€5,669) on examinations, of  
12  
13 which a mean £3,402 (€4,004) was not reimbursed. For senior trainees (ST8), an average  
14  
15 £9,796 (€11,500) had been spent on exams, of which £5,396 (€6,351) was not reimbursed.  
16  
17

18  
19  
20 47 respondents (n=81%) from Ireland had undertaken a post-graduate degree since  
21  
22 graduating from medical school. The MCh was the most popular post-graduate degree  
23  
24 (n=15, 26%), followed by the MSc (n=13, 22%) and MD (n=11, 19%). The average estimated  
25  
26 total monetary cost of undertaking a postgraduate degree to the trainee, including course  
27  
28 fees and loss of income, was £22,093 (€25,936).  
29  
30  
31

### 32 33 **Estimated costs of training (UK and Ireland) using CCT essential and desirable criteria**

34  
35  
36 The costs range between £20,000 (€23,479) to £26,000 (€30,523) depending on surgical  
37  
38 specialty, except OMFS, which is considerably higher (£71,431 or €83,858) due to the dual  
39  
40 qualification in medicine and dentistry as well as having significantly more mandatory  
41  
42 training courses than other specialties **Appendix 4**.  
43  
44

45  
46  
47 Only the minority of the costs are tax deductible, add to this the estimated cost of a  
48  
49 postgraduate degree (£18,009 or €21,142), which many surgical trainees will also undertake  
50  
51 at their own expense, and the estimated costs to the trainee increase to approximately  
52  
53 £40,000 (€46,958, excluding OMFS).  
54  
55  
56  
57  
58  
59  
60

## Discussion

This study has shown that individual doctors incur many thousands of pounds in personal expense after graduating from medical school to pursue a career as a surgeon and to meet the requirements to complete surgical training. These costs are incurred in addition to the significant debt built up by most medical school graduates, a debt burden likely to rise further as a greater proportion of students graduate under increased student tuition fees in the UK. Many of the costs paid by the trainee towards their training are not recognised as tax deductible, yet are incurred to cover requirements that are essential to progress through training schemes, and therefore to maintain one's livelihood. Consultant surgeons-to-be now spend considerably more per year on courses than in the past, and these now represent the single largest training cost, according to our results. Efforts to make surgery an attractive and inclusive career must include an equitable distribution of training costs to the trainee.

Individual trainees spend significant amounts on courses that are not actually mandatory as documented in CCT requirements. We speculate there are two reasons for this; firstly, surgical trainees will undertake courses above and beyond the minimum requirements to develop their skills. Gaps in knowledge and experience delivered in current training posts are likely to contribute to this, such that simulation courses are necessary to address training needs. As such, issues with training programmes failing to meet trainee's educational needs are instead transferred to trainees, who still obtain this necessary training at their own cost. Secondly, to be competitive for higher surgical training and for consultant posts, trainees may undertake additional courses and extracurricular activities.

1  
2  
3 We have identified a regional variation in what amount is available to trainees, despite the  
4  
5 standardised placement fee from the LETB. Study budgets for specialty trainees were lower  
6  
7 than the values released in response to the recent FOI request by Varley *et al* in 7 out of 10  
8  
9 LETBs (North Central, South and North West London, North West England, East of England,  
10  
11 Kent Surrey and Sussex and North East England), and equal in three LETBs (East Midlands,  
12  
13 Wales, West Midlands)<sup>16</sup>. It is desirable that study budgets are standardised across the UK,  
14  
15 in both amount and that they should not be top-sliced to provide mandatory regional  
16  
17 teaching, and in the longer term all items deemed essential for CCT (including the JCST fee),  
18  
19 should be funded directly, without expense to the trainee. ASiT has previously highlighted  
20  
21 this issue of uncontrolled geographical variation, calling for an equitable approach through  
22  
23 national standardisation<sup>17</sup>.  
24  
25  
26  
27  
28

29  
30 Irish trainees bear similar high costs in surgical training to their UK counterparts, not  
31  
32 surprisingly given that JCST requirements are the same. The higher cost of courses for Irish  
33  
34 trainees may reflect increased travel and accommodation expenses, as many courses  
35  
36 require travel outside of Ireland and the exclusion of Irish interns from the study, who are  
37  
38 less likely to have undertaken expensive technical skills courses. The higher cost of exams  
39  
40 may reflect in part a higher proportion of Irish trainees who undertake USMLE examinations  
41  
42 to pursue a fellowship in the USA, as well as increased travel expenses to intercollegiate  
43  
44 examinations often held in the UK. While funding is available to reimburse some of these  
45  
46 expenses, it falls short of being sufficient to avoid trainees bearing the greatest burden of  
47  
48 the cost. These costs are on top of annual mandatory costs such as membership or  
49  
50 fellowship of RCSI. These are a significant additional cost- for example, the 2016/2017  
51  
52 subscription rate is £315 (€370) for fellows and £226 (€265) for members, and the annual  
53  
54  
55  
56  
57  
58  
59  
60

1  
2  
3 Irish Medical Council(IMC) retention fee (£477 (€560) for those registered for less than 3  
4  
5 years and £515 (€605) for those registered for more than 3 years). Of note, the payment for  
6  
7 the Irish Medical Council (IMC) is an annual payment and cannot be split across the year  
8  
9 which places a significant financial burden on trainees at the time of the year when they  
10  
11 move jobs and incur considerable additional expenses.  
12  
13

14  
15 68% of later stage higher surgical trainees in the UK and 81% of Irish trainees report  
16  
17 obtaining a higher degree. This was associated with an average cost estimated by  
18  
19 respondents of over £18,000 and £22,000 in the UK and Ireland, respectively. Whilst it is not  
20  
21 deemed mandatory by the JCST to undertake a higher degree within surgical training, there  
22  
23 are a number of reasons why surgical trainees choose to undertake one. Firstly, it is  
24  
25 required in order to practice as an academic consultant surgeon, and secondly, a significant  
26  
27 proportion of trainees will undertake one in order to make themselves competitive for  
28  
29 consultant appointment.  
30  
31  
32  
33

34  
35 Doctors need to be aware in advance of what their chosen pathway is likely to cost them,  
36  
37 alongside the starting salary for consultant posts when they complete their training (ranging  
38  
39 from £76,761 in the UK and £95,775 (€105,000) in Ireland<sup>18,19</sup>). This study has provided the  
40  
41 most detailed assessment yet for both UK and Irish surgical trainees. It is difficult to  
42  
43 compare the costs to other medical specialties as few similar studies have been undertaken  
44  
45 in other disciplines. One calculation for the training costs towards the completion of CCT in  
46  
47 Obstetrics and Gynaecology estimated slightly less than for surgical trainees, at £14,224<sup>20</sup>.  
48  
49 Another calculation for only the early stages of training in other specialties was also slightly  
50  
51 less for medicine and anaesthetics, than surgical specialties<sup>3</sup>. Comparisons to other  
52  
53 professional careers, such as solicitors, are also difficult, but working in the private sector  
54  
55  
56  
57  
58  
59  
60

1  
2  
3 has additional benefits. After qualifying with a law degree, solicitors must complete a Legal  
4  
5 Practice Course (LPC), which costs £8,500-£15,000 dependent on type of course and  
6  
7 location<sup>21</sup>. It is however possible to have this cost covered by a law firm if obtaining a  
8  
9 training contract in advance, and many law firms will also provide a living expense grant of  
10  
11 several thousand pounds per year<sup>22</sup>.  
12  
13

14  
15  
16 Research by the University of Kent for the Department of Health has provided cost-  
17  
18 estimates for the training of various doctor grades from the start of medical school  
19  
20 onwards<sup>23</sup>. This work found that the total cost of training a consultant was £564,112, with  
21  
22 some contributions that came largely from the individual (such as undergraduate university  
23  
24 fees, lost earnings, and postgraduate training fees) and others that came predominantly  
25  
26 from the state (clinical placement, tuition and replacement)<sup>23</sup>. It is not possible from the  
27  
28 document to disentangle the values independently contributed by each party.  
29  
30  
31

32  
33 An important consideration frequently overlooked in these analyses relates to the hospital  
34  
35 activity performed by trainees generating hospital income. Doctors in training have a value  
36  
37 as well as a cost, which should be taken into account to offset such cost-estimates. Two UK-  
38  
39 based studies have sought to quantify this within surgical training<sup>24,25</sup>. In general surgery, an  
40  
41 analysis of 1,184 out-patient clinic consultations demonstrated that trainees delivered a  
42  
43 quarter of all out-patient related income, averaging £36,452 per trainee<sup>24</sup>. This was  
44  
45 sufficient to offset 95% of the trainee's average basic salaries. Within ENT surgery, clinical  
46  
47 activity undertaken by SHO grade doctors was calculated to generate an annual net income  
48  
49 of £73,048 (4.3 times higher than their employment costs)<sup>25</sup>. Registrars generated an annual  
50  
51 net income of £121,587 (5.4 times their employment cost). In total, 94% of trainees  
52  
53 included in this analysis generated more hospital income than their employment costs.  
54  
55  
56  
57  
58  
59  
60

1  
2  
3 Given the benefit derived from hospitals from trainee-related clinical activity, it is  
4  
5 reasonable that a proportionate amount of the associated costs of training should be borne  
6  
7 by the employing hospitals.  
8  
9

10  
11 The costs analysed in this study present a comprehensive overview of the breadth and  
12  
13 depth of costs incurred by trainees. The survey was widely distributed across regions,  
14  
15 specialties and grades, increasing the likelihood that it is representative of trainee  
16  
17 experience. However, these results are specific to the UK and Ireland and caution should be  
18  
19 taken when comparing to other national surgical training systems due to international  
20  
21 variability of the requirements for completion of training, length of training programme,  
22  
23 differing training costs and salaries. A significant number of surveys were excluded due to  
24  
25 incompleteness, which we believe to be related to the need for accurate costings to complete  
26  
27 the survey. However, the overall number of completed responses was higher than required  
28  
29 to power the study. It is also recognised that some costs could be subject to recall bias or  
30  
31 an element of selection bias, in that those with significantly more debt may be more likely  
32  
33 to respond, however the figures reported are largely consistent with the calculations made  
34  
35 using the current prices of exams, courses and society memberships **Appendix 4**. Future  
36  
37 studies should seek to understand the balance of costs incurred by the health system in  
38  
39 supporting training, which are poorly understood, the influence of training cost on career  
40  
41 choice, and wider international comparisons on the costs of training in different health  
42  
43 systems.  
44  
45  
46  
47  
48  
49  
50  
51  
52  
53  
54  
55  
56  
57  
58  
59  
60

## Conclusions

Medical students are graduating with increasing debt. Surgical trainees achieve their educational requirements through considerable personal expenditure, with a total estimated monetary cost to the trainee in the region of £40,000 (£47,000). The Certificate of Completion of Training in surgical specialties comes with significant costs, which until now have not been accurately estimated. The cost goes far beyond the national training fee paid to the JCST annually in the UK, and greater transparency is immediately necessary to inform doctors of what their postgraduate training costs will be across all specialties. We strongly believe that the costs of mandatory surgical training should be covered by the Local Education and Training Boards, including the JCST fee and the costs of achieving CCT mandatory requirements. Furthermore, funding should be made available for non-mandatory surgical educational activity deemed beneficial by the trainee's educational supervisor, to ensure surgeons are trained to the highest level to provide excellent care. This is necessary to increase diversity in surgery, reduce debt load and make surgery a popular career choice again.



## Acknowledgements

We thank all those trainees who took the time to complete the survey. We acknowledge the work done by Edward Fitzgerald and Charles Giddings on the previous 2007 costs of surgical training survey.

## Contributors

RLH and JEFF conceived the study. All authors designed the questionnaire. JMOC collected the data. JMOC, HMM and RLH analysed the data. All authors were responsible for compiling and editing the manuscript, and approving the final article.

## Competing interests

The authors are either current or previous surgical trainees, and current or past elected members of the Council of the Association of Surgeons in Training (Registered Charity No. 274841). JEFF is an employee of KPMG Global Health Practice, Honorary Clinical Advisor to the Lifebox Foundation charity, and a Trustee of the SURG Foundation research charity. The authors have no other relevant financial or personal conflicts of interest to declare in relation to this paper.

## Funding

This research received no specific grant from any funding agency in the public, commercial or not-for-profit sectors.

## Data sharing statement

1  
2  
3 Summary data is available from the corresponding author at president@asit.org. Consent to  
4  
5 data sharing was sought prior to survey completion, and the presented data are anonymised  
6  
7  
8 grouped, hence risk of individual identification is low.  
9  
10  
11  
12  
13  
14  
15  
16  
17  
18  
19  
20  
21  
22  
23  
24  
25  
26  
27  
28  
29  
30  
31  
32  
33  
34  
35  
36  
37  
38  
39  
40  
41  
42  
43  
44  
45  
46  
47  
48  
49  
50  
51  
52  
53  
54  
55  
56  
57  
58  
59  
60

For peer review only

**Table 1.** Basic Demographics. Respondents divided by country of work.

| Demographic           | United Kingdom            | Ireland               |
|-----------------------|---------------------------|-----------------------|
| Number                | 848                       | 58                    |
| Male: Female (%)      | 518:327 (61.3:38.7, 3 NR) | 35:23 (60:40)         |
| Mean Age (years)      | 31.6 (range 23-55)        | 31.3 (range 25 to 41) |
| LTFT Trainees (%)     | 36 (4.3)                  | 0                     |
| Academic Trainees (%) | 69 (8.1)                  | N/A                   |

*NR= Not Reported, LTFT= Less than full time training*

For peer review only

**Table 2.** Specialty, stage of training and LETB (Local Education and Training Board) for respondents from UK.

| Which specialty do you intend to pursue?                                                                                                                                                                                                                                                                                                              | What is your stage of training?                                                                                                                                                                                                                                                                                                                                                             | In which LETB/Deanery do you work?                                                                                                                                                                                                                                                                                                                                                                                                                                       |
|-------------------------------------------------------------------------------------------------------------------------------------------------------------------------------------------------------------------------------------------------------------------------------------------------------------------------------------------------------|---------------------------------------------------------------------------------------------------------------------------------------------------------------------------------------------------------------------------------------------------------------------------------------------------------------------------------------------------------------------------------------------|--------------------------------------------------------------------------------------------------------------------------------------------------------------------------------------------------------------------------------------------------------------------------------------------------------------------------------------------------------------------------------------------------------------------------------------------------------------------------|
| Cardiothoracic Surgery: 32 (3.8%)<br>General Surgery: 296 (34.9%)<br>Neurosurgery: 28 (3.3%)<br>Oral and Maxillofacial: 19 (2.2%)<br>Otolaryngology: 75 (8.8%)<br>Paediatric Surgery: 29 (3.4%)<br>Plastic Surgery: 66 (7.8%)<br>Trauma and Orthopaedics: 172 (20.3%)<br>Vascular Surgery: 59 (5.4%)<br>Urology: 59 (7.0%)<br>Other/Unsure: 26 (3.1%) | Foundation Year 1: 12 (1.4%)<br>Foundation Year 2: 63 (7.4%)<br>ST1/CT1/SHO1: 148 (17.5%)<br>ST2/CT2/SHO2: 96 (11.3%)<br>CT3/SHO3: 10 (1.2%)<br>ST3/SPR1: 78 (9.2%)<br>ST4/SPR2: 59 (7.0%)<br>ST5/SPR3: 77 (9.1%)<br>ST6/SPR4: 59 (7.0%)<br>ST7/SPR5: 60 (7.1%)<br>ST8/SPR6: 67 (7.9%)<br>Post CCT: 17 (2.0%)<br>Clinical Fellow: 35 (4.1%)<br>Research Post: 53 (6.3%)<br>Other: 14 (1.7%) | Scotland: 70 (8.3%)<br>Northern Ireland: 49 (5.8%)<br>Wales: 51 (6.0%)<br>North East: 42 (5.0%)<br>North West: 80 (9.4%)<br>Yorkshire and Humber: 55 (6.5%)<br>East Midlands: 51 (6.0%)<br>West Midlands: 70 (8.3%)<br>East of England: 61 (7.2%)<br>Thames Valley: 41 (4.8%)<br>Kent, Surrey and Sussex: 41 (4.8%)<br>Wessex: 41 (4.8%)<br>South West: 61 (7.2%)<br>North East and Central London: 43 (5.1%)<br>North West London: 44 (5.2%)<br>South London: 46 (5.4%) |

CT= Core Training, NCE = North Central and East London, SPR= Specialist Registrar, ST= Specialist Training.

**Table 3.** Specialty and stage of training for respondents from Ireland.

| Which specialty do you intend to pursue? | What is your stage of training? |
|------------------------------------------|---------------------------------|
| Cardiothoracic Surgery: 2 (3%)           | ST1/CT1/SHO1: 13 (22%)          |
| General Surgery: 22 (38%)                | ST2/CT2/SHO2: 10 (17%)          |
| Neurosurgery: 1(2%)                      | ST3/SPR1: 12 (21%)              |
| Oral and Maxillofacial: 0                | ST4/SPR2: 5 (9%)                |
| Otolaryngology: 2 (3%)                   | ST5/SPR3: 4 (7%)                |
| Paediatric Surgery: 0                    | ST6/SPR4: 2 (3%)                |
| Plastic Surgery: 3(5%)                   | ST7/SPR5: 1 (2%)                |
| Trauma and Orthopaedics: 20(34%)         | ST8/SPR6: 3 (5%)                |
| Vascular Surgery: 2(3%)                  | Clinical Fellow: 1 (2%)         |
| Urology: 6 (10%)                         | Research Post: 1 (2%)           |

CT= Core Training, SPR= Specialist Registrar, ST= Specialist Training.

## References

1. Joint Committee on Surgical Training National Selection Leads Group, Verbal Communication 2016.
2. Jaunoo SS, King TR, Baker RF, Adama HL. A national survey of reasons why students and junior doctors choose not to pursue a career in surgery. *Annals of the Royal College of Surgeons* 2014;**96 (Suppl)**:192-94
3. Stroman L, Weil S, Butler K, McDonald C. The cost of a number: can you afford to become a surgeon? *The Bulletin of the Royal College of Surgeons of England* 2015;**97(3)**:107-11 doi: 10.1308/147363515x14162390057944[published Online First: Epub Date] | .
4. *The Cost of Surgical Training, Position Statement*. London, UK: Association of Surgeons in Training, 2007.
5. *Student Loans in England: Financial Year 2015-16*. Glasgow, UK: The Student Loans Company, 2016.
6. Ercolani MG, Vohra RS, Carmichael F, Mangat K, Alderson D. The lifetime cost to English students of borrowing to invest in a medical degree: a gender comparison using data from the Office for National Statistics. *BMJ open* 2015;**5(4)**:e007335 doi: 10.1136/bmjopen-2014-007335[published Online First: Epub Date] | .
7. *Statistical bulletin: UK consumer price inflation: Nov 2016*: Office for National Statistics, 2016.
8. *Defence healthcare education and training (DHET)- Applications polic for defence medical services (DMS) external education and training, 4-6-3. 1.2 ed*. Joint Services Publication, 2014.

- 1  
2  
3 9. Joint Committee on Surgical Training and Royal College of Surgeons in Ireland, Verbal  
4  
5 Communication.  
6  
7  
8  
9 10. Jones TL, Baxter MA, Khanduja V. A quick guide to survey research. Annals of the Royal  
10  
11 College of Surgeons of England 2013;**95**(1):5-7 doi:  
12  
13 10.1308/003588413x13511609956372[published Online First: Epub Date] | .  
14  
15  
16 11. Eysenbach G. Improving the quality of Web surveys: the Checklist for Reporting Results  
17  
18 of Internet E-Surveys (CHERRIES). Journal of medical Internet research 2004;**6**(3):e34 doi:  
19  
20 10.2196/jmir.6.3.e34[published Online First: Epub Date] | .  
21  
22  
23 12. Woodward CA. Questionnaire construction and question writing for research in medical  
24  
25 education. Medical education 1988;**22**(4):345-63  
26  
27  
28 13. JE B, JW K, CC H. Organizational research: determining appropriate sample size in survey  
29  
30 research. Information Technology, Learning and Performance Journal 2001;**19**(1):43-50  
31  
32  
33 14. ECB. Euro foreign exchange reference rates: European Central Bank, 2017.  
34  
35  
36 15. von Elm E, Altman DG, Egger M, Pocock SJ, Gotsche PC, Vandenbroucke JP. The  
37  
38 Strengthening the Reporting of Observational Studies in Epidemiology (STROBE) statement:  
39  
40 guidelines for reporting observational studies. Lancet (London, England)  
41  
42 2007;**370**(9596):1453-7 doi: 10.1016/s0140-6736(07)61602-x[published Online First: Epub  
43  
44 Date] | .  
45  
46  
47  
48 16. Varley I, Kumar A. Cost of training in oral and maxillofacial surgery: beyond the second  
49  
50 degree. The British journal of oral & maxillofacial surgery 2016;**54**(8):956-58 doi:  
51  
52 10.1016/j.bjoms.2016.06.006[published Online First: Epub Date] | .  
53  
54  
55  
56 17. Fitzgerald JE, Giddings CE, Khera G, Marron CD. Improving the future of surgical training  
57  
58  
59  
60

1  
2  
3 and education: consensus recommendations from the Association of Surgeons in Training.

4  
5 International journal of surgery (London, England) 2012;**10**(8):389-92 doi:

6  
7 10.1016/j.ijssu.2012.03.012[published Online First: Epub Date] |.

8  
9  
10 18. British Medical Association. Pay scales for Consultants. 2017.

11  
12 <https://www.bma.org.uk/advice/employment/pay/consultants-pay-england>

13  
14  
15  
16 19. Health Service Executive. April 1<sup>st</sup> 2017 Revised Consolidated Payscales.

17  
18 <http://www.hse.ie/eng/staff/benefitservices/pay/Consolidated-Payscales-1st-April->

19  
20  
21 2017.pdf

22  
23  
24 20. Orr K, Smith M. The financial burden of specialty training. BMJ Careers

25  
26  
27 2016;**353**(8063):542

28  
29 21. Costs of qualifying. Secondary Costs of qualifying 2017.

30  
31 <http://www.lawsociety.org.uk/law-careers/becoming-a-solicitor/costs-of-qualifying/>.

32  
33  
34 22. TargetJobs- Law. 2017.

35  
36  
37 23. Curtis L, Burns A. Unit costs of health and social care 2016: Personal social services

38  
39  
40 research unit, University of Kent, 2016.

41  
42 24. Fitzgerald JE, Ravindra P, Lepore M, Armstrong A, Bhangu A, Maxwell-Armstrong CA.

43  
44  
45 Financial impact of surgical training on hospital economics: an income analysis of 1184 out-

46  
47 patient clinic consultations. International journal of surgery (London, England)

48  
49 2013;**11**(5):378-82 doi: 10.1016/j.ijssu.2013.02.017[published Online First: Epub Date] |.

50  
51  
52 25. Clamp PJ, Malpas G, Mason KA, Giddings CE. Surgeons in training – a financial burden or

53  
54  
55 benefit to NHS trusts? Ann R Coll Surg Engl (Suppl) 2011;**93**:22-24



1  
2  
3 **Figure 1.** Stages and years of training for UK doctors training to be consultant surgeons.

4  
5 Foundation Doctor Year 1 is the first stage following graduation from university/medical  
6  
7 school. In Ireland, the Intern Year is the equivalent of the Foundation Doctor stage in the  
8  
9 UK.  
10

11  
12  
13  
14  
15 **Figure 2.** Mean debt on graduation from medical school, UK medical schools only. Debt has  
16  
17 increased significantly comparing the most recent generation (graduation between 2010  
18  
19 and 2014) with the older generation (graduation between 2000 and 2004),  $p < 0.01$ .  
20  
21  
22  
23

24  
25  
26 **Figure 3.** Mean expense per year on courses and conferences that trainees have not been  
27  
28 reimbursed. Trainees grouped into 5- year generations by year of graduation. Expense on  
29  
30 courses has increased significantly comparing the most recent generation (graduation  
31  
32 between 2010 and 2014) with the older generation (graduation between 2000 and 2004),  
33  
34  $p < 0.01$ . Expense on conferences has not significantly increased ( $p = 0.28$ ). UK medical school  
35  
36 graduates only.  
37  
38  
39  
40  
41  
42  
43  
44  
45  
46  
47  
48  
49  
50  
51  
52  
53  
54  
55  
56  
57  
58  
59  
60



Figure 1. Stages and years of training for UK doctors training to be consultant surgeons. Foundation Doctor Year 1 is the first stage following graduation from university/medical school. In Ireland, the Intern Year is the equivalent of the Foundation Doctor stage in the UK.!! †

44x34mm (300 x 300 DPI)

For peer review only

1  
2  
3  
4  
5  
6  
7  
8  
9  
10  
11  
12  
13  
14  
15  
16  
17  
18  
19  
20  
21  
22  
23  
24  
25  
26  
27  
28  
29  
30  
31  
32  
33  
34  
35  
36  
37  
38  
39  
40  
41  
42  
43  
44  
45  
46  
47  
48  
49  
50  
51  
52  
53  
54  
55  
56  
57  
58  
59  
60



Figure 2. Mean debt on graduation from medical school, UK medical schools only. Debt has increased significantly comparing the most recent generation (graduation between 2010 and 2014) with the older generation (graduation between 2000 and 2004),  $p < 0.01$ .!! †

42x25mm (300 x 300 DPI)

Review only



Figure 3. Mean expense per year on courses and conferences that trainees have not been reimbursed. Trainees grouped into 5- year generations by year of graduation. Expense on courses has increased significantly comparing the most recent generation (graduation between 2010 and 2014) with the older generation (graduation between 2000 and 2004),  $p < 0.01$ . Expense on conferences has not significantly increased ( $p = 0.28$ ). UK medical school graduates only.!! †

43x21mm (300 x 300 DPI)

review only

### Appendix One: Sources of Funding for Higher Surgical Trainees in Ireland

In Ireland, as the RCSI directly administers surgical training in Ireland, it receives funding from the HSE to provide surgical training. This includes covering the cost of the JCST fee and delivering the curriculum, including human factors and operative skills training days. However, other elements essential for CCT such as a leadership course, train the trainers course and good clinical practice are currently not directly provided. There are three funding streams available to trainees on higher specialist training, equivalent to the UK “study budget”- the current funding available to HST trainees are:

1. Mandatory Fund- this is provided by the HSE/NDTP and administered by RCSI. It provides funding of up to 1500 euros for approved mandatory courses while in full-time training in Ireland. This fund does not carry forward year on year and cannot be used if for example, on an overseas fellowship. However, its scope is limited as only approved mandatory courses are funded (1).
2. Specialist training fund- this is a fund of 500 euros per year, which accumulates over the course of HST. It can be used for course fees, equipment costs and books etc. It excludes time spent out of full time training, e.g. on an overseas fellowship (1).
3. There is an additional clinical courses and exams fund, where trainees can claim 450 euros for exams or courses on a definitive list of those deemed relevant to the speciality. This includes a narrow list, for example Advanced Trauma Life Support (ATLS). For exams undertaken outside of Ireland, 650 may be claimed. This is directly administered by the HSE/MET (2). The fund will only cover the cost once per trainee per examination.

At the time of this survey, many trainees would have spent time prior to commencing HST completing courses to make themselves competitive to apply for HST at considerable personal cost. In addition, the range of courses covered by the above list currently excludes many courses undertaken by trainees in their surgical training.

1  
2  
3 It is worth noting that the fund does not adequately cover the cost of courses. For example, the clinical course and examination refund scheme will cover  
4  
5 ATLS if undertaken in Ireland. The current cost of ATLS is 875 euros, but the scheme will only cover 450 euros. This does not include travel and  
6  
7 accommodation costs to regional centres to complete the course. Similarly, for membership and intercollegiate examinations, this fund does not fully cover  
8  
9 the cost, and as these are often held in the UK there are additional travel and accommodation expenses.  
10  
11  
12

13  
14 References Appendix 1:

- 15  
16  
17 1. RCSI Training Funds for SpR Trainees. [http://rcsi.ie/files/surgery/docs/20161019040654\\_Funding-Information-2016.pdf](http://rcsi.ie/files/surgery/docs/20161019040654_Funding-Information-2016.pdf) Accessed 16th January 2017  
18  
19 2. HSE-National Doctors Training and Planning. Specialist Training Fund Guidance Document. July 2016.  
20  
21  
22  
23  
24  
25  
26  
27  
28  
29  
30  
31  
32  
33  
34  
35  
36  
37  
38  
39  
40  
41  
42  
43  
44  
45  
46  
47



## Cost of Surgical Training Survey 2015

### 1. Introduction

**This survey aims to quantify the additional costs incurred by surgeons in training in pursuit of their career goals. It also aims to quantify the availability of study budgets to cover the required courses and other training needs.**

**A similar survey was conducted by ASiT in 2007 and we aim to give some comparison of changes over time.**

**The results will be freely disseminated, including through publication and on the trainee association websites, and provided to Political Leaders, the Royal Colleges, JCST and Specialty Associations.**

**Completion indicates your consent for this analysis, distribution and publication of anonymised, grouped results. Individual responses remain anonymous.**

**This survey is for ALL TRAINEES, REGARDLESS OF SURGICAL SPECIALTY in the UK and Republic of Ireland. Students are not included.**

**It takes approximately 10 minutes to complete.**

**For more information:**

**[www.asit.org](http://www.asit.org)**

**[info@asit.org](mailto:info@asit.org)**

**@ASiTofficial**

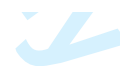



## Cost of Surgical Training Survey 2015

### 2. In which country do you work?

\* 1. Where do you work currently?

- United Kingdom
- Republic of Ireland
- Other

Other (please specify)

er review only



1  
2  
3  
4  
5  
6  
7  
8  
9  
10  
11  
12  
13  
14  
15  
16  
17  
18  
19  
20  
21  
22  
23  
24  
25  
26  
27  
28  
29  
30  
31  
32  
33  
34  
35  
36  
37  
38  
39  
40  
41  
42  
43  
44  
45  
46  
47  
48  
49  
50  
51  
52  
53  
54  
55  
56  
57  
58  
59  
60



Cost of Surgical Training Survey 2015

3. Pay

1 \* 2. What is your current basic salary (without overtime, to the nearest euro)?

2 Please do not enter commas or symbols into any boxes relating to numerical values.

3  
4  
5 To remind you, current payscales are:

6  
7 Intern € 30257

8 Senior House Officer

9 1 € 38839

10 2 € 40998

11 3 € 44224

12 4 € 46334

13 5 € 50578

14 6 € 52687

15 7 € 54746

16 Registrar

17 1 € 50578

18 2 € 52687

19 3 € 54746

20 4 € 56260

21 5 € 58279

22 6 € 60305

23 Senior Registrar

24 1 € 65000

25 2 € 65000

26 3 € 65620

27 4 € 67682

28 5 € 70061

29 6 € 72540

30 7 € 75097

31 Specialist Registrar

32 1 € 60404

33 2 € 61855

34 3 € 63953

35 4 € 65000

36 5 € 66070

37 6 € 68980

38 7 € 71878

39  
40  
41  
42  
43  
44  
45  
46  
47  
48  
49  
50  
51

52  
53 \* 3. What is your current average monthly take home pay after tax (to the nearest euro)?

54  
55

56  
57  
58  
59  
60

1 4. Are you getting paid for your overtime?  
2  
3

4  Yes- rostered only- all of it  
5

6  Yes- rostered only-some of it  
7

8  Yes- rostered and unrostered- all of it  
9

10  Yes-rostered and unrostered- some of it  
11

12  No  
13

14 \* 5. Are you currently entitled to a training fund? (e.g. the SpR mandatory training fund or specialist  
15 training fund?)  
16

17  Yes  
18

19  No  
20  
21  
22  
23  
24  
25  
26  
27  
28  
29  
30  
31  
32  
33  
34  
35  
36  
37  
38  
39  
40  
41  
42  
43  
44  
45  
46  
47  
48  
49  
50  
51  
52  
53  
54  
55  
56  
57  
58  
59  
60

peer review only



## Cost of Surgical Training Survey 2015

### 4. Demographics

\* 6. Are you a military trainee?

Yes

No

7. What is your gender?

Male

Female

\* 8. What is your age? (years)

view only



## Cost of Surgical Training Survey 2015

### 5. Current Post

\* 9. Do you currently hold an academic post?

Yes

No

\* 10. Are you in Less Than Full Time Training?

Yes

No

11. Are you currently on leave?

Yes- Maternity/Paternity leave

Yes- Other leave

No

\* 12. Which specialty do you intend to pursue?

Cardiothoracic surgery

General Surgery

ENT

Neurosurgery

Oral and Maxillofacial surgery

Paediatric Surgery

Plastic Surgery

Trauma and Orthopaedics

Vascular Surgery

Urology

Other (please specify)

1 \* 13. What is your current grade?  
2  
3  
4  
5  
6  
7  
8  
9  
10  
11  
12  
13  
14  
15  
16  
17  
18  
19  
20  
21  
22  
23  
24  
25  
26  
27  
28  
29  
30  
31  
32  
33  
34  
35  
36  
37  
38  
39  
40  
41  
42  
43  
44  
45  
46  
47  
48  
49  
50  
51  
52  
53  
54  
55  
56  
57  
58  
59  
60

- F1 or Intern
- F2
- ST1/CT1/SHO1
- ST2/CT2/SHO2
- CT3/SHO3
- ST3/SpR1
- ST4/SpR2
- ST5/SpR3
- ST6/SpR4
- ST7/SpR5
- ST8/SpR6
- Post CCT
- Clinical Fellow
- Research post with no clinical work
- Research post with part-time clinical work
- Part-time clinical non-training
- Other (please specify)

\* 14. Under which Deanery/Local Education Training Board do you work?

- 1  
2  
3  
4  
5  
6  
7  
8  
9  
10  
11  
12  
13  
14  
15  
16  
17  
18  
19  
20  
21  
22  
23  
24  
25  
26  
27  
28  
29  
30  
31  
32  
33  
34  
35  
36  
37  
38  
39  
40  
41  
42  
43  
44  
45  
46  
47  
48  
49  
50  
51  
52  
53  
54  
55  
56  
57  
58  
59  
60
- Republic of Ireland
  - NHS Education for Scotland
  - Northern Ireland Medical and Dental Training Agency
  - Wales Deanery
  - Health Education North East
  - Health Education North West
  - Health Education Yorkshire and the Humber
  - Health Education East Midlands
  - Health Education West Midlands
  - Health Education East of England
  - Health Education Thames Valley
  - Health Education Kent, Surrey and Sussex
  - Health Education Wessex
  - Health Education South West
  - Health Education North Central and East London
  - Health Education North West London
  - Health Education South London

ew only



## Cost of Surgical Training Survey 2015

### 6. Current Salary

\* 15. WITHOUT BANDING- What is your current basic salary? (gross, to the nearest pound)

Please do not enter commas or symbols into any boxes relating to numerical values.

To remind you, doctors in training pay scales:

England, Northern Ireland and Wales (Scotland in brackets).

FY1

22636 (23205)

24049 (24654)

25461 (26102)

FY2

28076 (28782)

29912 (30664)

31748 (32546)

Specialty Training

30002 (30605)

31838 (32478)

34402 (35093)

35952 (36675)

37822 (38582)

39693 (40491)

41564 (42399)

43434 (44307)

45304 (46215)

47175 (48123)



1  
2  
3  
4  
5  
6  
7  
8  
9  
10  
11  
12  
13  
14  
15  
16  
17  
18  
19  
20  
21  
22  
23  
24  
25  
26  
27  
28  
29  
30  
31  
32  
33  
34  
35  
36  
37  
38  
39  
40  
41  
42  
43  
44  
45  
46  
47  
48  
49  
50  
51  
52  
53  
54  
55  
56  
57  
58  
59  
60

\* 16. What is your current banding as per your contract?

- 1A
- 1B
- 1C
- 2A
- 2B
- 3
- Military- no banding recieved
- Other (please specify)

\* 17. Are you currently entitled to a study leave budget?

- Yes
- No
- Military trainee- funding at discretion of Defence Deanery

If yes, please give the approximate value for 12 months (to the nearest pound)

view only



## Cost of Surgical Training Survey 2015

### 7. Debts

\* 18. What year did you qualify from medical school?

\* 19. Where was your medical school?

- UK
- Republic of Ireland
- Other EU
- Outside EU

\* 20. Whilst at medical school have you received any of the following?

- Government student loan
- Military grant
- Bank or other loan
- NHS bursary
- Other bursary
- None of the above

\* 21. If, on qualifying from medical, school you had debt (overdraft, credit cards and all student or professional loans, excluding mortgages) - please estimate the total value at that time (to the nearest pound or euro)

\* 22. Is some or all of your study budget used to fund mandatory regional teaching?

- Some
- All
- None
- Don't know

1  
2  
3  
4  
5  
6  
7  
8  
9  
10  
11  
12  
13  
14  
15  
16  
17  
18  
19  
20  
21  
22  
23  
24  
25  
26  
27  
28  
29  
30  
31  
32  
33  
34  
35  
36  
37  
38  
39  
40  
41  
42  
43  
44  
45  
46  
47  
48  
49  
50  
51  
52  
53  
54  
55  
56  
57  
58  
59  
60

\* 23. How much in total have you have paid for courses out of your own money that was not reimbursed (cumulative over training, to the nearest pound or euro)?

\* 24. How much in total have you paid for conferences out of your own money that was not reimbursed (cumulative over training, to the nearest pound or euro)?

For peer review only



Cost of Surgical Training Survey 2015

8. Expenditures- Course and Exam Attendance

\* 25. During your surgical training please identify which of the following courses or exams you have attended/attempted, and how many times:

|                       | Once                  | Twice                 | 3 x                   | More                  | Never                 |
|-----------------------|-----------------------|-----------------------|-----------------------|-----------------------|-----------------------|
| ALS                   | <input type="radio"/> |
| APaedLS               | <input type="radio"/> |
| ATLS                  | <input type="radio"/> |
| Basic Surgical Skills | <input type="radio"/> |
| CCriSP                | <input type="radio"/> |
| USMLE                 | <input type="radio"/> |
| RCSEng STEP           | <input type="radio"/> |
| MRCS Parts 1&2/A      | <input type="radio"/> |
| MRCS Part 3/B         | <input type="radio"/> |
| DOHNS                 | <input type="radio"/> |
| FRCS Part 1           | <input type="radio"/> |
| FRCS Part 2           | <input type="radio"/> |
| Training the Trainers | <input type="radio"/> |

\* 26. For any of the following courses or exams you attended, did you receive any funding?

|                       | All                   | Part                  | None                  | Not applicable        |
|-----------------------|-----------------------|-----------------------|-----------------------|-----------------------|
| ALS                   | <input type="radio"/> | <input type="radio"/> | <input type="radio"/> | <input type="radio"/> |
| APaedLS               | <input type="radio"/> | <input type="radio"/> | <input type="radio"/> | <input type="radio"/> |
| ATLS                  | <input type="radio"/> | <input type="radio"/> | <input type="radio"/> | <input type="radio"/> |
| Basic Surgical Skills | <input type="radio"/> | <input type="radio"/> | <input type="radio"/> | <input type="radio"/> |
| CCriSP                | <input type="radio"/> | <input type="radio"/> | <input type="radio"/> | <input type="radio"/> |
| USMLE                 | <input type="radio"/> | <input type="radio"/> | <input type="radio"/> | <input type="radio"/> |
| RCSEng STEP           | <input type="radio"/> | <input type="radio"/> | <input type="radio"/> | <input type="radio"/> |
| MRCS Parts 1&2/A      | <input type="radio"/> | <input type="radio"/> | <input type="radio"/> | <input type="radio"/> |
| MRCS Part 3/B         | <input type="radio"/> | <input type="radio"/> | <input type="radio"/> | <input type="radio"/> |
| DOHNS                 | <input type="radio"/> | <input type="radio"/> | <input type="radio"/> | <input type="radio"/> |
| FRCS Part 1           | <input type="radio"/> | <input type="radio"/> | <input type="radio"/> | <input type="radio"/> |
| FRCS Part 2           | <input type="radio"/> | <input type="radio"/> | <input type="radio"/> | <input type="radio"/> |
| Training the Trainers | <input type="radio"/> | <input type="radio"/> | <input type="radio"/> | <input type="radio"/> |

\* 27. In the last year, how much have you spent attending MANDATORY courses (to the nearest pound or euro)?

\* 28. How much of this has been, or will be, reimbursed through your study budget or other funding (to the nearest pound or euro)?

\* 29. In the last year, how much have you spent attending NON-MANDATORY training courses (to the nearest pound or euro)?

\* 30. How much of this has been, or will be, reimbursed through your study budget or other funding (to the nearest pound or euro)?

\* 31. Since graduation from medical school, how much have you spent on registering for, or attending, post-graduate exams (to the nearest pound or euro)?

\* 32. How much of this has been reimbursed through your study budget or other funding (to the nearest pound or euro)?

33. Have you received industry funding to attend any of the following?

|             | No industry funding received | Minor industry funding (under half expenditure) | Major industry funding (over half expenditure) | Completely industry funded |
|-------------|------------------------------|-------------------------------------------------|------------------------------------------------|----------------------------|
| Courses     | <input type="radio"/>        | <input type="radio"/>                           | <input type="radio"/>                          | <input type="radio"/>      |
| Conferences | <input type="radio"/>        | <input type="radio"/>                           | <input type="radio"/>                          | <input type="radio"/>      |
| Exams       | <input type="radio"/>        | <input type="radio"/>                           | <input type="radio"/>                          | <input type="radio"/>      |

Or peer review only



## Cost of Surgical Training Survey 2015

### 9. Expenditures- Conferences, Memberships and Subscriptions

\* 34. In the last year, how much have you spent attending conferences (to the nearest pound or euro)?  
Please include the cost of travel, registration fees and accommodation.

\* 35. How much of this has been, or will be, reimbursed through your study budget or other funding (to the nearest pound or euro)?

\* 36. Have you been refused funding for attending conferences in any of the regions below, for reasons other than your budget has already been used up?

- UK - my deanery
- UK - outside my deanery
- Republic of Ireland
- I have not been refused funding
- Other (please specify)

1 \* 37. Are you a member of any of the following professional bodies or have any other professional fees to  
2 pay?  
3

- 4  General Medical Council or Irish Medical Council  
5  
6  Royal College of Surgeons of Edinburgh  
7  
8  Royal College of Surgeons of England  
9  
10  Royal College of Physicians and Surgeons of Glasgow  
11  
12  Royal College of Surgeons of Ireland  
13  
14  Specialty associations eg ASGBI / SCTS / BOA / ENT-UK / BNS / BAPS / BAOMS / Vascular Society / BAPRAS etc  
15  
16  Sub-specialty associations eg AUGIS / ACPGBI / BRS / ALSGBI / BASO / BTS etc  
17  
18  Trainee associations eg ASiT / BOTA etc  
19  
20  JCST (ISCP training fee)  
21  
22  British Medical Association or Irish Medical Organization  
23  
24  Hospital Consultants and Specialists Association  
25  
26  MDU / MPS / other medical indemnity provider  
27  
28  Royal Society of Medicine  
29  
30  Journal subscriptions  
31  
32  Regional training day fees  
33  
34  Others (please specify)

35

36  
37  
38 \* 38. What is your current annual subscription to your surgical royal college? (to the nearest pound or  
39 euro)  
40

41

42  
43  
44 \* 39. In the last year how much have you spent on specialty society memberships (excluding surgical  
45 royal colleges, to the nearest pound or euro)?  
46

47

48  
49  
50  
51 \* 40. In the last year how much have you spent on journal subscriptions (to the nearest pound or euro)?  
52

53

54  
55  
56 \* 41. In the last year how much have you spent on text books (to the nearest pound or euro)?  
57

58





## Cost of Surgical Training Survey 2015

### 10. Out of Training Fellowships and Postgraduate Degrees

\* 42. Have you undertaken a post-graduate degree since graduating from medical school?

- Yes- MD
- Yes- PhD/DPhil
- Yes- MSc
- Yes- MPhil
- Yes- MEd
- Yes- MA
- Yes- MS/MChir
- No

Yes- Other (please specify)

43. If yes, please estimate the cost of this degree to you personally in monetary terms. Please consider university fees and potential income lost that was not covered by any other funding source.

\* 44. Have you undertaken an overseas or other out-of-training fellowship?

- Yes
- No

45. If, yes, did this negatively impact on your financial situation, please describe.



## Cost of Surgical Training Survey 2015

### 11. Financial Advice

\* 46. Have you previously claimed tax relief from HM Revenue & Customs (or Revenue Tax and customs Ireland/Cain agus Custaim na hEireann) on any of the training and professional costs below? Please select all those that apply.

- GMC or Irish Medical Council
- Surgical Royal College
- MPS/MDU
- BMA or IMO
- Specialty Association
- Journal Subscriptions
- Exam Fees
- JCST
- Courses
- Conferences
- I have not claimed tax relief for any of the professional costs above

\* 47. Do you have, or have you ever consulted an accountant or financial advisor?

- Accountant
- Financial advisor
- Both
- Neither

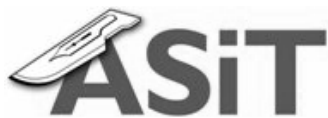

## Cost of Surgical Training Survey 2015

### 12. The Non-Monetary Costs of Surgical Training

**Nearly there, this is the last page of questions!**

\* 48. How many times have you moved house for work?

- 1
- 2
- 3
- 4
- 5
- 6
- 7
- 8
- 9
- 10
- 11
- 12
- 13
- 14
- 15
- 16 or above

\* 49. With regards to childcare please select one of the following:

- I do not have children
- I have had to pay for weekend childcare to allow me to work
- I have had to pay for evening childcare to allow me to work
- I have had to pay for both evening and weekend childcare to allow me to work
- I have children but have not had to pay for evening or weekend childcare

50. Do you think your surgical training has had a significant cost in terms of any of the following:

|                                            | Yes                   | No                    |
|--------------------------------------------|-----------------------|-----------------------|
| Mental Health                              | <input type="radio"/> | <input type="radio"/> |
| Physical Health                            | <input type="radio"/> | <input type="radio"/> |
| Relationships                              | <input type="radio"/> | <input type="radio"/> |
| Financial Security                         | <input type="radio"/> | <input type="radio"/> |
| Ability to settle down in a permanent home | <input type="radio"/> | <input type="radio"/> |

Other (please specify)

51. Please answer the following questions

|                                                                                                              | Yes                   | No                    | Unsure                |
|--------------------------------------------------------------------------------------------------------------|-----------------------|-----------------------|-----------------------|
| I have missed a major family event due to clinical work                                                      | <input type="radio"/> | <input type="radio"/> | <input type="radio"/> |
| I have missed many family events due to clinical work                                                        | <input type="radio"/> | <input type="radio"/> | <input type="radio"/> |
| I have missed a major family event due to non-clinical work that was necessary for my career progression     | <input type="radio"/> | <input type="radio"/> | <input type="radio"/> |
| I have missed many major family events due to non-clinical work that was necessary for my career progression | <input type="radio"/> | <input type="radio"/> | <input type="radio"/> |
| Staffing levels in my current post impact negatively on my quality of life                                   | <input type="radio"/> | <input type="radio"/> | <input type="radio"/> |
| Rota patterns in my current post impact negatively on my quality of life                                     | <input type="radio"/> | <input type="radio"/> | <input type="radio"/> |

52. Please answer the following questions

|                                                                                                                                                                                                                                           | Yes                   | No                    | Maybe                 |
|-------------------------------------------------------------------------------------------------------------------------------------------------------------------------------------------------------------------------------------------|-----------------------|-----------------------|-----------------------|
| I would support a fixed "training fee", which I would pay annually throughout my training that would cover tuition, courses, exams and fees to professional bodies such as surgical royal colleges, the GMC and one specialty association | <input type="radio"/> | <input type="radio"/> | <input type="radio"/> |
| I would support raising the annual Surgical Royal College Subscription for all MEMBERS AND FELLOWS in order to subsume the costs of the JCST fee                                                                                          | <input type="radio"/> | <input type="radio"/> | <input type="radio"/> |
| I would be happy to fund (up to £500 or 700 euro) a boot-camp in my specialty during core training                                                                                                                                        | <input type="radio"/> | <input type="radio"/> | <input type="radio"/> |
| The cost of surgical training in the UK and Ireland is likely to dissuade me from a career in surgery                                                                                                                                     | <input type="radio"/> | <input type="radio"/> | <input type="radio"/> |
| The cost of training in the UK and Ireland is likely to make me leave medicine altogether                                                                                                                                                 | <input type="radio"/> | <input type="radio"/> | <input type="radio"/> |
| The cost of training in the UK and Ireland is likely to make me leave the UK or Ireland to work as a doctor elsewhere                                                                                                                     | <input type="radio"/> | <input type="radio"/> | <input type="radio"/> |

53. Are there any other comments you would like to make regarding the cost of surgical training, study budgets or any other related matters? Please use the box below.

54. Who do you think should contribute to the cost of surgical training? Please rank the stakeholders below, from most contribution (1), to least (9).

|                          |                      |                                 |
|--------------------------|----------------------|---------------------------------|
| <input type="checkbox"/> | <input type="text"/> | The Government                  |
| <input type="checkbox"/> | <input type="text"/> | NHS Trusts                      |
| <input type="checkbox"/> | <input type="text"/> | Universities                    |
| <input type="checkbox"/> | <input type="text"/> | Private sector providers        |
| <input type="checkbox"/> | <input type="text"/> | Trainees                        |
| <input type="checkbox"/> | <input type="text"/> | Surgical Royal Colleges         |
| <input type="checkbox"/> | <input type="text"/> | Industry                        |
| <input type="checkbox"/> | <input type="text"/> | Surgical specialty associations |

view only

1  
2  
3  
4  
5  
6  
7  
8  
9  
10  
11  
12  
13  
14  
15  
16  
17  
18  
19  
20  
21  
22  
23  
24  
25  
26  
27  
28  
29  
30  
31  
32  
33  
34  
35  
36  
37  
38  
39  
40  
41  
42  
43  
44  
45  
46  
47  
48  
49  
50  
51  
52  
53  
54  
55  
56  
57  
58  
59  
60



## Cost of Surgical Training Survey 2015

### 13. End of Survey

**Thank you for taking the time to complete this survey, we are very grateful for your responses.**

**The results will be freely disseminated, including through publication and on trainee association websites, and provided to Political Leaders, the Royal Colleges, JCST and Specialty Associations.**

**For more information about the work being undertaken on your behalf, please visit our website, email us or tweet:**

**[www.asit.org](http://www.asit.org)**

**[info@asit.org](mailto:info@asit.org)**

**[@ASiTofficial](https://twitter.com/ASiTofficial)**

**For more information regarding professional bodies approved for tax relief:**

**<https://www.gov.uk/government/publications/professional-bodies-approved-for-tax-relief-list-3/approved-professional-organisations-and-learned-societies#g>**

Peer review only

### Appendix Three: Results for military trainees

There were 20 military trainee respondents. All 20 graduated from medical school in the UK: 19 (90%) graduated with debt on graduation (mean £18,650). 16 (80%) had a military grant at medical school, 10 (50%) had a government student loan and 4 (20%) had a bank or other loan. The mean amount paid out, that was not reimbursed, for courses was £4250, for conferences £1643, and £2130 for exams. Mean costs per year included surgical royal college subscription (£317), specialty society membership (£336), journals (£79), text books (£245). 7 had completed an MSc (35%), 5 an MD (25%) and 1 (5%) had done both since graduating from medical school (mean cost £12822).

| Which specialty do you intend to pursue?                                                  | What is your stage of training?                                                                                                                                                                                                                                                  |
|-------------------------------------------------------------------------------------------|----------------------------------------------------------------------------------------------------------------------------------------------------------------------------------------------------------------------------------------------------------------------------------|
| General Surgery: 6 (30%)<br>Trauma and Orthopaedics: 6 (30%)<br>Vascular Surgery: 2 (10%) | Foundation Year 1: 1 (5%)<br>Foundation Year 2: 0 (0%)<br>ST1/CT1/SHO1: 4 (20%)<br>ST2/CT2/SHO2: 2 (10%)<br>ST3/SPR1: 1 (5%)<br>ST4/SPR2: 4 (20%)<br>ST5/SPR3: 2 (10%)<br>ST6/SPR4: 1 (5%)<br>ST7/SPR5: 1 (5%)<br>ST8/SPR6: 1 (5%)<br>Post CCT: 1 (5%)<br>Research Post: 2 (10%) |

| Demographic                  | Military Trainees  |
|------------------------------|--------------------|
| <b>Number</b>                | 20                 |
| <b>Male: Female (%)</b>      | 14:6 (70:30%)      |
| <b>Mean Age (years)</b>      | 33.8 (range 27-41) |
| <b>LTFT Trainees (%)</b>     | 0 (0)              |
| <b>Academic Trainees (%)</b> | 1 (5%)             |

#### Appendix Four: Tables of costs to the trainee in each surgical specialty

Using the published requirements for progression through surgical training we have provided an estimated breakdown of the costs to the trainee in each surgical specialty. The following tables of costs assume straight progression through F1-ST8 without taking time out for LTFT, post-graduate degrees or other career breaks. These prices are correct as of November 2016. July 2016 CCT guidance used as per JCST website. Conference costs do not include travel or subsistence.

*BMA= British Medical Association, CCT= Certificate of Completion of Training, CST= Core Surgical Trainee, CT= Core Training (year), FP=Foundation Programme, FRCS= Fellowship of the Royal College of Surgeons, GMC= General Medical Council, HST=Higher Surgical Trainee, JCST= Joint Committee on Surgical Training, MRCS= Membership of the Royal College of Surgeons, RCS= Surgical Royal College, RCSEng= Royal College of Surgeons of England, RCPSCG= Royal College of Physicians and Surgeons of Glasgow, ST= Specialty Trainee (year).*



1  
2  
3  
4  
5  
6  
7  
8  
9  
10  
11  
12  
13  
14  
15  
16  
17  
18  
19  
20  
21  
22  
23  
24  
25  
26  
27  
28  
29  
30  
31  
32  
33  
34  
35  
36  
37  
38  
39  
40  
41  
42  
43  
44  
45  
46  
47

### Cardiothoracic Surgery

| Requirements                                                                                                                                                   | Cost                                                                                      |
|----------------------------------------------------------------------------------------------------------------------------------------------------------------|-------------------------------------------------------------------------------------------|
| <i>Essential for Surgical Training</i>                                                                                                                         |                                                                                           |
| JCST fee (for 8 years)                                                                                                                                         | £255 per year of surgical training                                                        |
| GMC registration (for 10 years)                                                                                                                                | £200 for FP1 year, £425 per year for FP2+                                                 |
| <i>Mandatory for progression to ST3</i>                                                                                                                        |                                                                                           |
| MRCS examination                                                                                                                                               | £1425                                                                                     |
| <i>Desirable for progression to ST3</i>                                                                                                                        |                                                                                           |
| RCSEng Basic Surgical Skills Course (BSS)                                                                                                                      | £670.50                                                                                   |
| Advanced Trauma Life Support Course (ATLS)                                                                                                                     | £710                                                                                      |
| RCSEng Care of the Critically Ill Surgical Patient Course (CCrISP)                                                                                             | £724                                                                                      |
| RCSEng Specialty Skills in Cardiothoracic Surgery Course                                                                                                       | £774                                                                                      |
| <i>Mandatory for CCT</i>                                                                                                                                       |                                                                                           |
| FRCS examination (including completion fee)                                                                                                                    | £2269                                                                                     |
| Good Clinical Practice Course                                                                                                                                  | Free                                                                                      |
| NHS Management Course e.g. BMA management essentials                                                                                                           | £354                                                                                      |
| Training and Education Course e.g. RCSEng Training the Trainers                                                                                                | £702                                                                                      |
| National or international conference attendance each year of training e.g. Society for Cardiothoracic Surgery conference booked as early bird rate as a member | £205 per year for 2 years as CST, £305 per year for 6 years as HST                        |
| <i>Other</i>                                                                                                                                                   |                                                                                           |
| BMA Membership (for 10 years)                                                                                                                                  | £113 for FP1 year, £222 per year for FP2-CT2, £329 per year for ST3-5, £443 per year ST6+ |
| RCS subscription fees e.g. RCSEng if complete MRCS at CT2 and FRCS as ST8                                                                                      | £316 per year for 5 years as member, £531 for 1 year as fellow                            |
| Specialty Association Membership e.g. Society for Cardiothoracic Surgery                                                                                       | £100 per year for 2 years as CST, £200 per year for 6 years as HST                        |
| Healthcare Protection Organisation (for 10 years) e.g. Medical Defence Union                                                                                   | £1800                                                                                     |
| <b>TOTAL ESTIMATE</b>                                                                                                                                          | <b>£24039.00</b>                                                                          |

## General Surgery

| Requirements                                                                                                                                                                     | Cost                                                                                      |
|----------------------------------------------------------------------------------------------------------------------------------------------------------------------------------|-------------------------------------------------------------------------------------------|
| <i>Essential for Surgical Training</i>                                                                                                                                           |                                                                                           |
| JCST fee (for 8 years)                                                                                                                                                           | £255 per year of surgical training                                                        |
| GMC registration (for 10 years)                                                                                                                                                  | £200 for FP1 year, £425 per year for FP2+                                                 |
| <i>Mandatory for progression to ST3</i>                                                                                                                                          |                                                                                           |
| MRCS examination                                                                                                                                                                 | £1425                                                                                     |
| RCSEng Basic Surgical Skills Course (BSS)                                                                                                                                        | £670.50                                                                                   |
| Advanced Trauma Life Support Course (ATLS)                                                                                                                                       | £650                                                                                      |
| RCSEng Care of the Critically Ill Surgical Patient Course (CCrISP)                                                                                                               | £724                                                                                      |
| <i>Mandatory for CCT</i>                                                                                                                                                         |                                                                                           |
| FRCS examination (and completion fee)                                                                                                                                            | £2269                                                                                     |
| Good Clinical Practice Course                                                                                                                                                    | Free                                                                                      |
| NHS Management Course e.g. BMA management essentials                                                                                                                             | £354                                                                                      |
| Training and Education Course e.g. RCSEng Training the Trainers                                                                                                                  | £702                                                                                      |
| Course relevant to specialist interest e.g. RCSEng specialty skills in coloproctology                                                                                            | £585                                                                                      |
| ATLS revalidation to keep valid at time of certification                                                                                                                         | £350                                                                                      |
| Attendance at 4 national or international conferences during training e.g. Association of Surgeons of Great Britain and Ireland conference booked as early bird rate as a member | £260 per year for 4 years                                                                 |
| <i>Other</i>                                                                                                                                                                     |                                                                                           |
| BMA Membership (for 10 years)                                                                                                                                                    | £113 for FP1 year, £222 per year for FP2-CT2, £329 per year for ST3-5, £443 per year ST6+ |
| RCS subscription fees e.g. RCSEng if complete MRCS at CT2 and FRCS as ST8                                                                                                        | £316 per year for 5 years as member, £531 for 1 year as fellow                            |
| Specialty Association Membership e.g. Association of Surgeons of Great Britain and Ireland                                                                                       | £81 per year for 8 years                                                                  |
| Healthcare Protection Organisation (for 10 years) e.g. Medical Defence Union                                                                                                     | £1800                                                                                     |
| <b>TOTAL ESTIMATE</b>                                                                                                                                                            | <b>£22488.50</b>                                                                          |

## Neurosurgery

| Requirements                                                                                                                                                                    | Cost                                                                                      |
|---------------------------------------------------------------------------------------------------------------------------------------------------------------------------------|-------------------------------------------------------------------------------------------|
| <i>Essential for Surgical Training</i>                                                                                                                                          |                                                                                           |
| JCST fee (for 8 years)                                                                                                                                                          | £255 per year of surgical training                                                        |
| GMC registration (for 10 years)                                                                                                                                                 | £200 for FP1 year, £425 per year for FP2+                                                 |
| <i>Mandatory for progression to ST3</i>                                                                                                                                         |                                                                                           |
| MRCS examination                                                                                                                                                                | £1425.00                                                                                  |
| <i>Desirable for progression to ST3</i>                                                                                                                                         |                                                                                           |
| RCSEng Basic Surgical Skills Course (BSS)                                                                                                                                       | £670.50                                                                                   |
| Advanced Trauma Life Support Course (ATLS)                                                                                                                                      | £650.00                                                                                   |
| RCSEng Care of the Critically Ill Surgical Patient Course (CCriSP)                                                                                                              | £724.00                                                                                   |
| <i>Mandatory for CCT</i>                                                                                                                                                        |                                                                                           |
| FRCS examination (including completion fee)                                                                                                                                     | £2269.00                                                                                  |
| Good Clinical Practice Course                                                                                                                                                   | Free                                                                                      |
| Research Methodology Course                                                                                                                                                     | Free                                                                                      |
| NHS Management Course e.g. BMA management essentials                                                                                                                            | £354.00                                                                                   |
| Training and Education Course e.g. RCSEng Training the Trainers                                                                                                                 | £702.00                                                                                   |
| Advanced Trauma Life Support Course (ATLS) completed during training                                                                                                            | included above                                                                            |
| Attendance at 4 national or international conferences during training e.g. Society of British Neurological Surgeons conference booked as early bird rate as an affiliate member | £150 per year for 4 years                                                                 |
| <i>Other</i>                                                                                                                                                                    |                                                                                           |
| BMA Membership (for 10 years)                                                                                                                                                   | £113 for FP1 year, £222 per year for FP2-CT2, £329 per year for ST3-5, £443 per year ST6+ |
| RCS subscription fees e.g. RCSEng if complete MRCS at CT2 and FRCS as ST8                                                                                                       | £316 per year for 5 years as member, £531 for 1 year as fellow                            |
| Specialty Association Membership e.g. Society of British Neurological Surgeons                                                                                                  | £145 per year for 8 years                                                                 |
| Healthcare Protection Organisation (for 10 years) e.g. Medical Defence Union                                                                                                    | £1800                                                                                     |
| <b>TOTAL ESTIMATE</b>                                                                                                                                                           | <b>£21625.50</b>                                                                          |

### Oral and Maxillofacial Surgery

| Requirements                                                                                                  | Cost                                      |
|---------------------------------------------------------------------------------------------------------------|-------------------------------------------|
| <i>Essential for Surgical Training</i>                                                                        |                                           |
| Bachelor of Dental Surgery e.g. University of Liverpool BDS graduate entry                                    | £9000 for 4 years                         |
| JCST fee (for 7 years)                                                                                        | £255 per year of surgical training        |
| GMC registration (for 9 years)                                                                                | £200 for FP1 year, £425 per year for FP2+ |
| GDC registration (for 9 years)                                                                                | £890 per year                             |
| <i>Mandatory for progression to ST3</i>                                                                       |                                           |
| MRCs examination                                                                                              | £1425                                     |
| <i>Desirable for progression to ST3</i>                                                                       |                                           |
| Advanced Trauma Life Support Course (ATLS)                                                                    | £650                                      |
| RCSEng Care of the Critically Ill Surgical Patient Course (CCrISP)                                            | £724                                      |
| Acute Life-threatening Events Recognition and Treatment (ALERT) Course                                        | £95                                       |
| <i>Mandatory for CCT</i>                                                                                      |                                           |
| FRCS examination (including completion fee)                                                                   | £2269                                     |
| Good Clinical Practice Course                                                                                 | Free                                      |
| Research Methodology Course                                                                                   | Free                                      |
| NHS Management Course e.g. BMA management essentials                                                          | £354                                      |
| Training and Education Course e.g. RCSEng Training the Trainers                                               | £702                                      |
| ATLS revalidation to keep valid at time of certification                                                      | £350                                      |
| Emergency Skills Course e.g. RCSEng Emergency Skills in Oral and Maxillofacial Surgery                        | £877.50                                   |
| Basic Plating Course e.g. AO basic OMFS plating course                                                        | £499                                      |
| Head and Neck Anatomy Course e.g. RCSEng basic surgical anatomy of the head and neck                          | £414                                      |
| Surgical Dermatology Course e.g. RCSEd Facial aesthetics course                                               | £785                                      |
| Orthognathic Course e.g. 6 <sup>th</sup> biennial Glasgow course                                              | £495                                      |
| Microvascular Course e.g. University of Liverpool microvascular course                                        | £1400                                     |
| Complex/Advanced Trauma Course inc. condylar fractures and orbital access e.g. SORG course                    | £1500                                     |
| 3 advanced sub-specialty courses:                                                                             |                                           |
| e.g. Establishing a modern salivary gland practice                                                            | £1250                                     |
| e.g. Newcastle functional septorhinoplasty and facial plastics cadaveric course                               | £950                                      |
| e.g. Controversies in the management of head and neck cancer                                                  | £275                                      |
| National or international conference attendance e.g. BAOMS Conference booked as early bird rate as a member * | £200                                      |

1  
2  
3  
4  
5  
6  
7  
8  
9  
10  
11  
12  
13  
14  
15  
16  
17  
18  
19  
20  
21  
22  
23  
24  
25  
26  
27  
28  
29  
30  
31  
32  
33  
34  
35  
36  
37  
38  
39  
40  
41  
42  
43  
44  
45  
46  
47

|                                                                                              |                                                                                           |
|----------------------------------------------------------------------------------------------|-------------------------------------------------------------------------------------------|
| <i>Other</i>                                                                                 |                                                                                           |
| BMA Membership (for 9 years)                                                                 | £113 for FP1 year, £222 per year for FP2-CT2, £329 per year for ST3-5, £443 per year ST6+ |
| RCS subscription fees e.g. RCSEng if complete MRCS at CT2 and FRCS as ST7                    | £316 per year for 4 years as member, £531 for 1 year as fellow                            |
| Specialty Association Membership e.g. British Association of Oral and Maxillofacial Surgeons | £85 per year for 7 years                                                                  |
| Healthcare Protection Organisation (for 9 years) e.g. Medical Defence Union                  | £1325                                                                                     |
| <b>TOTAL ESTIMATE</b>                                                                        | <b>£71431.50</b>                                                                          |

\* Where no minimum number of attendances documented a minimum of 1 included

## Otolaryngology

| Requirements                                                                                      | Cost                                                                                      |
|---------------------------------------------------------------------------------------------------|-------------------------------------------------------------------------------------------|
| <i>Essential for Surgical Training</i>                                                            |                                                                                           |
| JCST fee (for 8 years)                                                                            | £255 per year of surgical training                                                        |
| GMC registration (for 10 years)                                                                   | £200 for FP1 year, £425 per year for FP2+                                                 |
| <i>Mandatory for progression to ST3</i>                                                           |                                                                                           |
| Diploma of Otolaryngology Head and Neck Surgery (DO-HNS)                                          | £932.00                                                                                   |
| <i>Desirable for progression to ST3</i>                                                           |                                                                                           |
| RCSEng Basic Surgical Skills Course (BSS)                                                         | £670.50                                                                                   |
| Advanced Trauma Life Support Course (ATLS)                                                        | £650                                                                                      |
| RCSEng Care of the Critically Ill Surgical Patient Course (CCrISP)                                | £724                                                                                      |
| Advanced Life Support Course                                                                      | £550                                                                                      |
| Advanced Paediatric Life Support Course and 2 x ENT courses                                       | see below                                                                                 |
| <i>Mandatory for CCT</i>                                                                          |                                                                                           |
| FRCS examination (including completion fee)                                                       | £2269                                                                                     |
| Good Clinical Practice Course                                                                     | Free                                                                                      |
| Research Methodology Course                                                                       | Free                                                                                      |
| Training and Education Course e.g. RCSEng Training the Trainers                                   | £702                                                                                      |
| Temporal Bone Dissection Course e.g. Cuschieri Skills Course                                      | £225                                                                                      |
| Sinus Anatomy and Surgical Dissection Course e.g. Cuschieri Skills Course                         | £275                                                                                      |
| Head and Neck Surgery Course (including LASER) e.g. RCSEd Head and Neck Course Module 1 and 2     | £850 and £1050                                                                            |
| Septorhinoplasty and Facial Plastics Surgery Course e.g. NSTC Course                              | £350                                                                                      |
| Advanced Paediatric Life Support Course                                                           | £395                                                                                      |
| National or international conference attendance e.g. BACO Conference booked as an ENT-UK member * | £825                                                                                      |
| <i>Other</i>                                                                                      |                                                                                           |
| BMA Membership (for 10 years)                                                                     | £113 for FP1 year, £222 per year for FP2-CT2, £329 per year for ST3-5, £443 per year ST6+ |
| RCS subscription fees e.g. RCSEng if complete MRCS at CT2 and FRCS as ST8                         | £316 per year for 5 years as member, £531 for 1 year as fellow                            |
| Specialty Association Membership e.g. ENT-UK                                                      | £210 per year for 8 years                                                                 |
| Healthcare Protection Organisation (for 10 years) e.g. Medical Defence Union                      | £1800                                                                                     |
| <b>TOTAL ESTIMATE</b>                                                                             | <b>£25218.50</b>                                                                          |

\* Where no minimum number of attendances documented a minimum of 1 included

## Paediatric Surgery

| Requirements                                                                                                                                       | Cost                                                                                      |
|----------------------------------------------------------------------------------------------------------------------------------------------------|-------------------------------------------------------------------------------------------|
| <i>Essential for Surgical Training</i>                                                                                                             |                                                                                           |
| JCST fee (for 8 years)                                                                                                                             | £255 per year of surgical training                                                        |
| GMC registration (for 10 years)                                                                                                                    | £200 for FP1 year, £425 per year for FP2+                                                 |
| <i>Mandatory for progression to ST3</i>                                                                                                            |                                                                                           |
| MRCS examination                                                                                                                                   | £1425                                                                                     |
| Advanced Paediatric Life Support Course                                                                                                            | £395                                                                                      |
| <i>Desirable for progression to ST3</i>                                                                                                            |                                                                                           |
| RCSEng Basic Surgical Skills Course (BSS)                                                                                                          | £670.50                                                                                   |
| Advanced Trauma Life Support Course (ATLS)                                                                                                         | £650                                                                                      |
| RCSEng Care of the Critically Ill Surgical Patient Course (CCrISP)                                                                                 | £724                                                                                      |
| <i>Mandatory for CCT</i>                                                                                                                           |                                                                                           |
| FRCS examination (including completion fee)                                                                                                        | £2269                                                                                     |
| Good Clinical Practice Course                                                                                                                      | Free                                                                                      |
| Research Methodology Course                                                                                                                        | Free                                                                                      |
| NHS Management Course e.g. BMA management essentials                                                                                               | £354                                                                                      |
| Training and Education Course e.g. RCSEng Training the Trainers                                                                                    | £702                                                                                      |
| ATLS revalidation to keep valid at time of certification                                                                                           | £350                                                                                      |
| National or international conference attendance e.g. British Association of Paediatric Surgeons conference booked as early bird rate as a member * | £150                                                                                      |
| <i>Other</i>                                                                                                                                       |                                                                                           |
| BMA Membership (for 10 years)                                                                                                                      | £113 for FP1 year, £222 per year for FP2-CT2, £329 per year for ST3-5, £443 per year ST6+ |
| RCS subscription fees e.g. RCSEng if complete MRCS at CT2 and FRCS as ST8                                                                          | £316 per year for 5 years as member, £531 for 1 year as fellow                            |
| Specialty Association Membership e.g. British Association of Paediatric Surgeons                                                                   | £110 per year for 8 years                                                                 |
| Healthcare Protection Organisation (for 10 years) e.g. Medical Defence Union                                                                       | £1800                                                                                     |
| <b>TOTAL ESTIMATE</b>                                                                                                                              | <b>£21640.50</b>                                                                          |

\* Where no minimum number of attendances documented a minimum of 1 included

## Plastic Surgery

| Requirements                                                                 | Cost                                                                                      |
|------------------------------------------------------------------------------|-------------------------------------------------------------------------------------------|
| <i>Essential for Surgical Training</i>                                       |                                                                                           |
| JCST fee (for 8 years)                                                       | £255 per year of surgical training                                                        |
| GMC registration (for 10 years)                                              | £200 for FP1 year, £425 per year for FP2+                                                 |
| <i>Mandatory for progression to ST3</i>                                      |                                                                                           |
| MRCS examination                                                             | £1425                                                                                     |
| <i>Desirable for progression to ST3</i>                                      |                                                                                           |
| RCSEng Basic Surgical Skills Course (BSS)                                    | £670.50                                                                                   |
| Advanced Trauma Life Support Course (ATLS)                                   | £650                                                                                      |
| RCSEng Care of the Critically Ill Surgical Patient Course (CCrISP)           | £724                                                                                      |
| <i>Mandatory for CCT</i>                                                     |                                                                                           |
| FRCS examination (including completion fee)                                  | £2269                                                                                     |
| Good Clinical Practice Course                                                | Free                                                                                      |
| Research Methodology Course                                                  | Free                                                                                      |
| Training and Education Course e.g. RCSEng Training the Trainers              | £702                                                                                      |
| Advanced Trauma Life Support Course (ATLS) completed during training         | included above                                                                            |
| <i>Other</i>                                                                 |                                                                                           |
| BMA Membership (for 10 years)                                                | £113 for FP1 year, £222 per year for FP2-CT2, £329 per year for ST3-5, £443 per year ST6+ |
| RCS subscription fees e.g. RCSEng if complete MRCS at CT2 and FRCS as ST8    | £316 per year for 5 years as member, £531 for 1 year as fellow                            |
| Specialty Association Membership e.g. BAPRAS                                 | £150 per year for 7 years (first year membership free)                                    |
| Healthcare Protection Organisation (for 10 years) e.g. Medical Defence Union | £1800                                                                                     |
| <b>TOTAL ESTIMATE</b>                                                        | <b>£20561.50</b>                                                                          |



## Trauma and Orthopaedic Surgery

| Requirements                                                                                                         | Cost                                                                                                                                         |
|----------------------------------------------------------------------------------------------------------------------|----------------------------------------------------------------------------------------------------------------------------------------------|
| <i>Essential for Surgical Training</i>                                                                               |                                                                                                                                              |
| JCST fee (for 8 years)                                                                                               | £255 per year of surgical training                                                                                                           |
| GMC registration (for 10 years)                                                                                      | £200 for FP1 year, £425 per year for FP2+                                                                                                    |
| <i>Mandatory for progression to ST3</i>                                                                              |                                                                                                                                              |
| MRCS examination                                                                                                     | £1425                                                                                                                                        |
| Advanced Trauma Life Support Course (ATLS)                                                                           | £650                                                                                                                                         |
| <i>Desirable for progression to ST3</i>                                                                              |                                                                                                                                              |
| RCSEng Basic Surgical Skills Course (BSS)                                                                            | £670.50                                                                                                                                      |
| RCSEng Care of the Critically Ill Surgical Patient Course (CCrISP)                                                   | £724                                                                                                                                         |
| Basic Course on Fracture Management e.g. RCPSCG principles of casting for orthopaedic trainees                       | £20                                                                                                                                          |
| <i>Mandatory for CCT</i>                                                                                             |                                                                                                                                              |
| FRCS examination (including completion fee)                                                                          | £2269                                                                                                                                        |
| Good Clinical Practice Course                                                                                        | Free                                                                                                                                         |
| Research Methodology Course                                                                                          | Free                                                                                                                                         |
| Training and Education Course e.g. RCSEng Training the Trainers                                                      | £702                                                                                                                                         |
| ATLS revalidation to keep valid at time of certification                                                             | £350                                                                                                                                         |
| National or international conference attendance e.g. British Orthopaedic Association conference booked as a member * | Free                                                                                                                                         |
| <i>Other</i>                                                                                                         |                                                                                                                                              |
| BMA Membership (for 10 years)                                                                                        | £113 for FP1 year, £222 per year for FP2-CT2, £329 per year for ST3-5, £443 per year ST6+                                                    |
| RCS subscription fees e.g. RCSEng if complete MRCS at CT2 and FRCS as ST8                                            | £316 per year for 5 years as member, £531 for 1 year as fellow                                                                               |
| Specialty Association Membership e.g. British Orthopaedic Association                                                | £152 per year for 2 years as CST, £166 per year for 2 years as ST3-4, £204 per year for 2 years as ST5-6, £240 per year for 2 years as ST7-8 |
| Healthcare Protection Organisation (for 10 years) e.g. Medical Defence Union                                         | £1800                                                                                                                                        |
| <b>TOTAL ESTIMATE</b>                                                                                                | <b>£21405.50</b>                                                                                                                             |

\* Where no minimum number of attendances documented a minimum of 1 included

## Urology

| Requirements                                                                                                                                                                    | Cost                                                                                      |
|---------------------------------------------------------------------------------------------------------------------------------------------------------------------------------|-------------------------------------------------------------------------------------------|
| <i>Essential for Surgical Training</i>                                                                                                                                          |                                                                                           |
| JCST fee (for 7 years)                                                                                                                                                          | £255 per year of surgical training                                                        |
| GMC registration (for 9 years)                                                                                                                                                  | £200 for FP1 year, £425 per year for FP2+                                                 |
| <i>Mandatory for progression to ST3</i>                                                                                                                                         |                                                                                           |
| MRCS examination                                                                                                                                                                | £1425                                                                                     |
| <i>Desirable for progression to ST3</i>                                                                                                                                         | £670.50                                                                                   |
| RCSEng Basic Surgical Skills Course (BSS)                                                                                                                                       | £650                                                                                      |
| Advanced Trauma Life Support Course (ATLS)                                                                                                                                      | £724                                                                                      |
| RCSEng Care of the Critically Ill Surgical Patient Course (CCrISP)                                                                                                              |                                                                                           |
| <i>Mandatory for CCT</i>                                                                                                                                                        |                                                                                           |
| FRCS examination (including completion fee)                                                                                                                                     | £2269                                                                                     |
| Good Clinical Practice Course                                                                                                                                                   | Free                                                                                      |
| Research Methodology Course                                                                                                                                                     | Free                                                                                      |
| NHS Management Course e.g. BMA management essentials                                                                                                                            | £354                                                                                      |
| Training and Education Course e.g. RCSEng Training the Trainers                                                                                                                 | £702                                                                                      |
| ATLS revalidation to keep valid at time of certification                                                                                                                        | £350                                                                                      |
| Urodynamics Course e.g. Belfast Training Academy Course                                                                                                                         | £187.50                                                                                   |
| Paediatric Urology Course e.g. BAPU Course                                                                                                                                      | £295                                                                                      |
| Spinal Injuries Course e.g. Princess Royal Spinal Unit Course                                                                                                                   | £450                                                                                      |
| Emergency Urology Course e.g. East of England Emergency Urology Course                                                                                                          | £65                                                                                       |
| Attendance at 1 national or international conference every 2 years of training e.g. British Association of Urological Surgeons Conference booked as early bird rate as a member | £100 per year for 3 years                                                                 |
| <i>Other</i>                                                                                                                                                                    |                                                                                           |
| BMA Membership (for 9 years)                                                                                                                                                    | £113 for FP1 year, £222 per year for FP2-CT2, £329 per year for ST3-5, £443 per year ST6+ |
| RCS subscription fees e.g. RCSEng if complete MRCS at CT2 and FRCS as ST7                                                                                                       | £316 per year for 4 years as member, £531 for 1 year as fellow                            |
| Specialty Association Membership e.g. British Association of Urological Surgeons                                                                                                | £160 per year for 7 years                                                                 |
| Healthcare Protection Organisation (for 9 years) e.g. Medical Defence Union                                                                                                     | £1325                                                                                     |
| <b>TOTAL ESTIMATE</b>                                                                                                                                                           | <b>£20719</b>                                                                             |

## Vascular Surgery

| Requirements                                                                                                                    | Cost                                                                                      |
|---------------------------------------------------------------------------------------------------------------------------------|-------------------------------------------------------------------------------------------|
| <i>Essential for Surgical Training</i>                                                                                          |                                                                                           |
| JCST fee (for 8 years)                                                                                                          | £255 per year of surgical training                                                        |
| GMC registration (for 10 years)                                                                                                 | £200 for FP1 year, £425 per year for FP2+                                                 |
| <i>Mandatory for progression to ST3</i>                                                                                         |                                                                                           |
| MRCS examination                                                                                                                | £1425                                                                                     |
| RCSEng Basic Surgical Skills Course (BSS)                                                                                       | £670.50                                                                                   |
| Advanced Trauma Life Support Course (ATLS)                                                                                      | £650                                                                                      |
| RCSEng Care of the Critically Ill Surgical Patient Course (CCrISP)                                                              | £724                                                                                      |
| <i>Mandatory for CCT</i>                                                                                                        |                                                                                           |
| FRCS examination (including completion fee)                                                                                     | £2269                                                                                     |
| Good Clinical Practice Course                                                                                                   | Free                                                                                      |
| Research Methodology Course                                                                                                     | Free                                                                                      |
| NHS Management Course e.g. BMA management essentials                                                                            | £354                                                                                      |
| Training and Education Course e.g. RCSEng Training the Trainers                                                                 | £702                                                                                      |
| ATLS revalidation to keep valid at time of certification                                                                        | £350                                                                                      |
| National or international conference attendance per year e.g. Vascular Society Conference booked as a member at early bird rate | £375 per year for 8 years                                                                 |
| <i>Other</i>                                                                                                                    |                                                                                           |
| BMA Membership (for 10 years)                                                                                                   | £113 for FP1 year, £222 per year for FP2-CT2, £329 per year for ST3-5, £443 per year ST6+ |
| RCS subscription fees e.g. RCSEng if complete MRCS at CT2 and FRCS as ST7                                                       | £316 per year for 5 years as member, £531 for 1 year as fellow                            |
| Specialty Association Membership e.g. Vascular Society                                                                          | £115 per year for 8 years                                                                 |
| Healthcare Protection Organisation (for 10 years) e.g. Medical Defence Union                                                    | £1800                                                                                     |
| <b>TOTAL ESTIMATE</b>                                                                                                           | <b>£24135.50</b>                                                                          |

# STROBE Statement for A CROSS-SECTIONAL STUDY OF THE FINANCIAL COST OF TRAINING TO THE SURGICAL TRAINEE

|                           | Item No | Recommendation                                                                                                                                                                                                                                                                                                                                                                                                                                                                                                  |
|---------------------------|---------|-----------------------------------------------------------------------------------------------------------------------------------------------------------------------------------------------------------------------------------------------------------------------------------------------------------------------------------------------------------------------------------------------------------------------------------------------------------------------------------------------------------------|
| <b>Title and abstract</b> | 1       | (a) Indicate the study's design with a commonly used term in the title or the abstract<br>PAGE 1<br><input type="checkbox"/>                                                                                                                                                                                                                                                                                                                                                                                    |
|                           |         | (b) Provide in the abstract an informative and balanced summary of what was done and what was found<br>PAGE 2-3<br><input type="checkbox"/>                                                                                                                                                                                                                                                                                                                                                                     |
| <b>Introduction</b>       |         |                                                                                                                                                                                                                                                                                                                                                                                                                                                                                                                 |
| Background/rationale      | 2       | Explain the scientific background and rationale for the investigation being reported<br>PAGE 5-6<br><input type="checkbox"/>                                                                                                                                                                                                                                                                                                                                                                                    |
| Objectives                | 3       | State specific objectives, including any prespecified hypotheses<br>PAGE 6<br><input type="checkbox"/>                                                                                                                                                                                                                                                                                                                                                                                                          |
| <b>Methods</b>            |         |                                                                                                                                                                                                                                                                                                                                                                                                                                                                                                                 |
| Study design              | 4       | Present key elements of study design early in the paper<br>PAGE 7-10<br><input type="checkbox"/>                                                                                                                                                                                                                                                                                                                                                                                                                |
| Setting                   | 5       | Describe the setting, locations, and relevant dates, including periods of recruitment, exposure, follow-up, and data collection<br>PAGE 7-10<br><input type="checkbox"/>                                                                                                                                                                                                                                                                                                                                        |
| Participants              | 6       | (a) <i>Cohort study</i> —Give the eligibility criteria, and the sources and methods of selection of participants. Describe methods of follow-up<br><i>Case-control study</i> —Give the eligibility criteria, and the sources and methods of case ascertainment and control selection. Give the rationale for the choice of cases and controls<br><i>Cross-sectional study</i> —Give the eligibility criteria, and the sources and methods of selection of participants<br>PAGE 7-10<br><input type="checkbox"/> |
|                           |         | (b) <i>Cohort study</i> —For matched studies, give matching criteria and number of exposed and unexposed<br><i>Case-control study</i> —For matched studies, give matching criteria and the number of controls per case                                                                                                                                                                                                                                                                                          |
| Variables                 | 7       | Clearly define all outcomes, exposures, predictors, potential confounders, and effect modifiers. Give diagnostic criteria, if applicable                                                                                                                                                                                                                                                                                                                                                                        |

|                              |    |                                                                                                                                                                                                                                                                                                                                                                                                                                                                                                                                                                                                                                    |
|------------------------------|----|------------------------------------------------------------------------------------------------------------------------------------------------------------------------------------------------------------------------------------------------------------------------------------------------------------------------------------------------------------------------------------------------------------------------------------------------------------------------------------------------------------------------------------------------------------------------------------------------------------------------------------|
|                              |    | PAGE 7-10<br>□                                                                                                                                                                                                                                                                                                                                                                                                                                                                                                                                                                                                                     |
| Data sources/<br>measurement | 8* | For each variable of interest, give sources of data and details of methods of assessment (measurement). Describe comparability of assessment methods if there is more than one group                                                                                                                                                                                                                                                                                                                                                                                                                                               |
| Bias                         | 9  | Describe any efforts to address potential sources of bias<br>PAGE 4, 7-10<br>□                                                                                                                                                                                                                                                                                                                                                                                                                                                                                                                                                     |
| Study size                   | 10 | Explain how the study size was arrived at<br>PAGE 10<br>□                                                                                                                                                                                                                                                                                                                                                                                                                                                                                                                                                                          |
| Quantitative variables       | 11 | Explain how quantitative variables were handled in the analyses. If applicable, describe which groupings were chosen and why<br>PAGE 7-10<br>□                                                                                                                                                                                                                                                                                                                                                                                                                                                                                     |
| Statistical methods          | 12 | (a) Describe all statistical methods, including those used to control for confounding<br>PAGE 10<br>□<br>(b) Describe any methods used to examine subgroups and interactions<br>PAGE 10<br>□<br>(c) Explain how missing data were addressed<br>PAGE 9<br>□<br>(d) <i>Cohort study</i> —If applicable, explain how loss to follow-up was addressed<br><i>Case-control study</i> —If applicable, explain how matching of cases and controls was addressed<br><i>Cross-sectional study</i> —If applicable, describe analytical methods taking account of sampling strategy<br>PAGE 7-10<br>□<br>(e) Describe any sensitivity analyses |

Continued on next page

**Results**

|                   |     |                                                                                                                                                                                                                                                                                                                             |
|-------------------|-----|-----------------------------------------------------------------------------------------------------------------------------------------------------------------------------------------------------------------------------------------------------------------------------------------------------------------------------|
| Participants      | 13* | (a) Report numbers of individuals at each stage of study—eg numbers potentially eligible, examined for eligibility, confirmed eligible, included in the study, completing follow-up, and analysed<br>PAGE 10-12<br><input type="checkbox"/>                                                                                 |
|                   |     | (b) Give reasons for non-participation at each stage<br>PAGE 10-12<br><input type="checkbox"/>                                                                                                                                                                                                                              |
|                   |     | (c) Consider use of a flow diagram N/A                                                                                                                                                                                                                                                                                      |
| Descriptive data  | 14* | (a) Give characteristics of study participants (eg demographic, clinical, social) and information on exposures and potential confounders<br>PAGE 10-12<br><input type="checkbox"/>                                                                                                                                          |
|                   |     | (b) Indicate number of participants with missing data for each variable of interest<br>PAGE 10-13<br><input type="checkbox"/>                                                                                                                                                                                               |
|                   |     | (c) <i>Cohort study</i> —Summarise follow-up time (eg, average and total amount)                                                                                                                                                                                                                                            |
| Outcome data      | 15* | <i>Cohort study</i> —Report numbers of outcome events or summary measures over time<br><i>Case-control study</i> —Report numbers in each exposure category, or summary measures of exposure<br><i>Cross-sectional study</i> —Report numbers of outcome events or summary measures<br>PAGE 10-13<br><input type="checkbox"/> |
| Main results      | 16  | (a) Give unadjusted estimates and, if applicable, confounder-adjusted estimates and their precision (eg, 95% confidence interval). Make clear which confounders were adjusted for and why they were included<br>PAGE 10-13<br><input type="checkbox"/>                                                                      |
|                   |     | (b) Report category boundaries when continuous variables were categorized<br>PAGE 10-13<br><input type="checkbox"/>                                                                                                                                                                                                         |
|                   |     | (c) If relevant, consider translating estimates of relative risk into absolute risk for a meaningful time period                                                                                                                                                                                                            |
| Other analyses    | 17  | Report other analyses done—eg analyses of subgroups and interactions, and sensitivity analyses                                                                                                                                                                                                                              |
| <b>Discussion</b> |     |                                                                                                                                                                                                                                                                                                                             |
| Key results       | 18  | Summarise key results with reference to study objectives<br>PAGE 14-18<br><input type="checkbox"/>                                                                                                                                                                                                                          |
| Limitations       | 19  | Discuss limitations of the study, taking into account sources of potential bias or imprecision. Discuss both direction and magnitude of any potential bias<br>PAGE 4<br><input type="checkbox"/>                                                                                                                            |
| Interpretation    | 20  | Give a cautious overall interpretation of results considering objectives, limitations, multiplicity of analyses, results from similar studies, and other relevant evidence                                                                                                                                                  |

|   |                  |                                                                          |
|---|------------------|--------------------------------------------------------------------------|
| 1 |                  |                                                                          |
| 2 |                  | PAGE 14-18                                                               |
| 3 |                  | □                                                                        |
| 4 | Generalisability | 21 Discuss the generalisability (external validity) of the study results |
| 5 |                  | PAGE 14-18                                                               |
| 6 |                  | □                                                                        |
| 7 |                  |                                                                          |

---

**Other information**

---

|    |         |                                                                                                     |
|----|---------|-----------------------------------------------------------------------------------------------------|
| 8  |         |                                                                                                     |
| 9  |         |                                                                                                     |
| 10 | Funding | 22 Give the source of funding and the role of the funders for the present study and, if applicable, |
| 11 |         | for the original study on which the present article is based                                        |
| 12 |         | PAGE 19                                                                                             |
| 13 |         | □                                                                                                   |
| 14 |         |                                                                                                     |

\*Give information separately for cases and controls in case-control studies and, if applicable, for exposed and unexposed groups in cohort and cross-sectional studies.

**Note:** An Explanation and Elaboration article discusses each checklist item and gives methodological background and published examples of transparent reporting. The STROBE checklist is best used in conjunction with this article (freely available on the Web sites of PLoS Medicine at <http://www.plosmedicine.org/>, Annals of Internal Medicine at <http://www.annals.org/>, and Epidemiology at <http://www.epidem.com/>). Information on the STROBE Initiative is available at [www.strobe-statement.org](http://www.strobe-statement.org).
