# Supplementary material for: Cross-sectional study of the financial cost of training to the surgical trainee in the UK and Ireland
Source: PubMed Central journal article supplement — BMJ Open. 2017 Nov 15;7(11):e018086. doi: 10.1136/bmjopen-2017-018086 (PMC5695344; doi:10.1136/bmjopen-2017-018086), 2017-11-15
Supplement: bmjopen-2017-018086supp002.pdf [file bmjopen-2017-018086supp002.pdf]

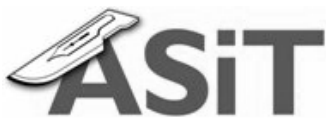

## Cost of Surgical Training Survey 2015

### 1. Introduction

**This survey aims to quantify the additional costs incurred by surgeons in training in pursuit of their career goals. It also aims to quantify the availability of study budgets to cover the required courses and other training needs.**

**A similar survey was conducted by ASiT in 2007 and we aim to give some comparison of changes over time.**

**The results will be freely disseminated, including through publication and on the trainee association websites, and provided to Political Leaders, the Royal Colleges, JCST and Specialty Associations.**

**Completion indicates your consent for this analysis, distribution and publication of anonymised, grouped results. Individual responses remain anonymous.**

**This survey is for ALL TRAINEES, REGARDLESS OF SURGICAL SPECIALTY in the UK and Republic of Ireland. Students are not included.**

**It takes approximately 10 minutes to complete.**

**For more information:**

**[www.asit.org](http://www.asit.org)**

**[info@asit.org](mailto:info@asit.org)**

**@ASiTofficial**

## Cost of Surgical Training Survey 2015

### 2. In which country do you work?

\* 1. Where do you work currently?

- ☐ United Kingdom
- ☐ Republic of Ireland
- ☐ Other

Other (please specify)

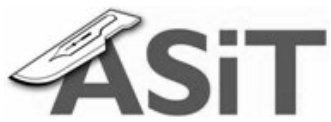

## Cost of Surgical Training Survey 2015

### 3. Pay

\* 2. What is your current basic salary (without overtime, to the nearest euro)?

Please do not enter commas or symbols into any boxes relating to numerical values.

To remind you, current payscales are:

Intern € 30257

Senior House Officer

1 € 38839

2 € 40998

3 € 44224

4 € 46334

5 € 50578

6 € 52687

7 € 54746

Registrar

1 € 50578

2 € 52687

3 € 54746

4 € 56260

5 € 58279

6 € 60305

Senior Registrar

1 € 65000

2 € 65000

3 € 65620

4 € 67682

5 € 70061

6 € 72540

7 € 75097

Specialist Registrar

1 € 60404

2 € 61855

3 € 63953

4 € 65000

5 € 66070

6 € 68980

7 € 71878

\* 3. What is your current average monthly take home pay after tax (to the nearest euro)?

4. Are you getting paid for your overtime?

- ☐ Yes- rostered only- all of it
- ☐ Yes- rostered only-some of it
- ☐ Yes- rostered and unrostered- all of it
- ☐ Yes-rostered and unrostered- some of it
- ☐ No

\* 5. Are you currently entitled to a training fund? (e.g. the SpR mandatory training fund or specialist training fund?)

- ☐ Yes
- ☐ No

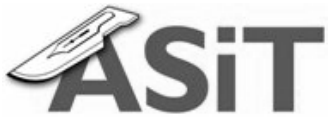

## Cost of Surgical Training Survey 2015

### 4. Demographics

\* 6. Are you a military trainee?

☐ Yes

☐ No

7. What is your gender?

☐ Male

☐ Female

\* 8. What is your age? (years)

## Cost of Surgical Training Survey 2015

### 5. Current Post

\* 9. Do you currently hold an academic post?

☐ Yes

☐ No

\* 10. Are you in Less Than Full Time Training?

☐ Yes

☐ No

11. Are you currently on leave?

☐ Yes- Maternity/Paternity leave

☐ Yes- Other leave

☐ No

\* 12. Which specialty do you intend to pursue?

☐ Cardiothoracic surgery

☐ General Surgery

☐ ENT

☐ Neurosurgery

☐ Oral and Maxillofacial surgery

☐ Paediatric Surgery

☐ Plastic Surgery

☐ Trauma and Orthopaedics

☐ Vascular Surgery

☐ Urology

☐ Other (please specify)

\* 13. What is your current grade?

- ☐ F1 or Intern
- ☐ F2
- ☐ ST1/CT1/SHO1
- ☐ ST2/CT2/SHO2
- ☐ CT3/SHO3
- ☐ ST3/SpR1
- ☐ ST4/SpR2
- ☐ ST5/SpR3
- ☐ ST6/SpR4
- ☐ ST7/SpR5
- ☐ ST8/SpR6
- ☐ Post CCT
- ☐ Clinical Fellow
- ☐ Research post with no clinical work
- ☐ Research post with part-time clinical work
- ☐ Part-time clinical non-training
- ☐ Other (please specify)

\* 14. Under which Deanery/Local Education Training Board do you work?

- ☐ Republic of Ireland
- ☐ NHS Education for Scotland
- ☐ Northern Ireland Medical and Dental Training Agency
- ☐ Wales Deanery
- ☐ Health Education North East
- ☐ Health Education North West
- ☐ Health Education Yorkshire and the Humber
- ☐ Health Education East Midlands
- ☐ Health Education West Midlands
- ☐ Health Education East of England
- ☐ Health Education Thames Valley
- ☐ Health Education Kent, Surrey and Sussex
- ☐ Health Education Wessex
- ☐ Health Education South West
- ☐ Health Education North Central and East London
- ☐ Health Education North West London
- ☐ Health Education South London

## Cost of Surgical Training Survey 2015

### 6. Current Salary

\* 15. WITHOUT BANDING- What is your current basic salary? (gross, to the nearest pound)

Please do not enter commas or symbols into any boxes relating to numerical values.

To remind you, doctors in training pay scales:

England, Northern Ireland and Wales (Scotland in brackets).

FY1

22636 (23205)

24049 (24654)

25461 (26102)

FY2

28076 (28782)

29912 (30664)

31748 (32546)

Specialty Training

30002 (30605)

31838 (32478)

34402 (35093)

35952 (36675)

37822 (38582)

39693 (40491)

41564 (42399)

43434 (44307)

45304 (46215)

47175 (48123)

\* 16. What is your current banding as per your contract?

- ☐ 1A
- ☐ 1B
- ☐ 1C
- ☐ 2A
- ☐ 2B
- ☐ 3
- ☐ Military- no banding recieved
- ☐ Other (please specify)

\* 17. Are you currently entitled to a study leave budget?

- ☐ Yes
- ☐ No
- ☐ Military trainee- funding at discretion of Defence Deanery

If yes, please give the approximate value for 12 months (to the nearest pound)

## Cost of Surgical Training Survey 2015

### 7. Debts

\* 18. What year did you qualify from medical school?

\* 19. Where was your medical school?

- ☐ UK
- ☐ Republic of Ireland
- ☐ Other EU
- ☐ Outside EU

\* 20. Whilst at medical school have you received any of the following?

- ☐ Government student loan
- ☐ Military grant
- ☐ Bank or other loan
- ☐ NHS bursary
- ☐ Other bursary
- ☐ None of the above

\* 21. If, on qualifying from medical, school you had debt (overdraft, credit cards and all student or professional loans, excluding mortgages) - please estimate the total value at that time (to the nearest pound or euro)

\* 22. Is some or all of your study budget used to fund mandatory regional teaching?

- ☐ Some
- ☐ All
- ☐ None
- ☐ Don't know

\* 23. How much in total have you have paid for courses out of your own money that was not reimbursed (cumulative over training, to the nearest pound or euro)?

\* 24. How much in total have you paid for conferences out of your own money that was not reimbursed (cumulative over training, to the nearest pound or euro)?

## Cost of Surgical Training Survey 2015

### 8. Expenditures- Course and Exam Attendance

\* 25. During your surgical training please identify which of the following courses or exams you have attended/attempted, and how many times:

|                       | Once                  | Twice                 | 3 x                   | More                  | Never                 |
|-----------------------|-----------------------|-----------------------|-----------------------|-----------------------|-----------------------|
| ALS                   | <input type="radio"/> |
| APaedsLS              | <input type="radio"/> |
| ATLS                  | <input type="radio"/> |
| Basic Surgical Skills | <input type="radio"/> |
| CCriSP                | <input type="radio"/> |
| USMLE                 | <input type="radio"/> |
| RCSEng STEP           | <input type="radio"/> |
| MRCS Parts 1&2/A      | <input type="radio"/> |
| MRCS Part 3/B         | <input type="radio"/> |
| DOHNS                 | <input type="radio"/> |
| FRCS Part 1           | <input type="radio"/> |
| FRCS Part 2           | <input type="radio"/> |
| Training the Trainers | <input type="radio"/> |

\* 26. For any of the following courses or exams you attended, did you receive any funding?

|                       | All                   | Part                  | None                  | Not applicable        |
|-----------------------|-----------------------|-----------------------|-----------------------|-----------------------|
| ALS                   | <input type="radio"/> | <input type="radio"/> | <input type="radio"/> | <input type="radio"/> |
| APaedsLS              | <input type="radio"/> | <input type="radio"/> | <input type="radio"/> | <input type="radio"/> |
| ATLS                  | <input type="radio"/> | <input type="radio"/> | <input type="radio"/> | <input type="radio"/> |
| Basic Surgical Skills | <input type="radio"/> | <input type="radio"/> | <input type="radio"/> | <input type="radio"/> |
| CCriSP                | <input type="radio"/> | <input type="radio"/> | <input type="radio"/> | <input type="radio"/> |
| USMLE                 | <input type="radio"/> | <input type="radio"/> | <input type="radio"/> | <input type="radio"/> |
| RCSEng STEP           | <input type="radio"/> | <input type="radio"/> | <input type="radio"/> | <input type="radio"/> |
| MRCS Parts 1&2/A      | <input type="radio"/> | <input type="radio"/> | <input type="radio"/> | <input type="radio"/> |
| MRCS Part 3/B         | <input type="radio"/> | <input type="radio"/> | <input type="radio"/> | <input type="radio"/> |
| DOHNS                 | <input type="radio"/> | <input type="radio"/> | <input type="radio"/> | <input type="radio"/> |
| FRCS Part 1           | <input type="radio"/> | <input type="radio"/> | <input type="radio"/> | <input type="radio"/> |
| FRCS Part 2           | <input type="radio"/> | <input type="radio"/> | <input type="radio"/> | <input type="radio"/> |
| Training the Trainers | <input type="radio"/> | <input type="radio"/> | <input type="radio"/> | <input type="radio"/> |

\* 27. In the last year, how much have you spent attending MANDATORY courses (to the nearest pound or euro)?

\* 28. How much of this has been, or will be, reimbursed through your study budget or other funding (to the nearest pound or euro)?

\* 29. In the last year, how much have you spent attending NON-MANDATORY training courses (to the nearest pound or euro)?

\* 30. How much of this has been, or will be, reimbursed through your study budget or other funding (to the nearest pound or euro)?

\* 31. Since graduation from medical school, how much have you spent on registering for, or attending, post-graduate exams (to the nearest pound or euro)?

\* 32. How much of this has been reimbursed through your study budget or other funding (to the nearest pound or euro)?

33. Have you received industry funding to attend any of the following?

|             | No industry funding<br>received | Minor industry funding<br>(under half expenditure) | Major industry funding<br>(over half expenditure) | Completely industry<br>funded |
|-------------|---------------------------------|----------------------------------------------------|---------------------------------------------------|-------------------------------|
| Courses     | <input type="radio"/>           | <input type="radio"/>                              | <input type="radio"/>                             | <input type="radio"/>         |
| Conferences | <input type="radio"/>           | <input type="radio"/>                              | <input type="radio"/>                             | <input type="radio"/>         |
| Exams       | <input type="radio"/>           | <input type="radio"/>                              | <input type="radio"/>                             | <input type="radio"/>         |

## Cost of Surgical Training Survey 2015

### 9. Expenditures- Conferences, Memberships and Subscriptions

- \* 34. In the last year, how much have you spent attending conferences (to the nearest pound or euro)?  
Please include the cost of travel, registration fees and accommodation.

- \* 35. How much of this has been, or will be, reimbursed through your study budget or other funding (to the nearest pound or euro)?

- \* 36. Have you been refused funding for attending conferences in any of the regions below, for reasons other than your budget has already been used up?

- ☐ UK - my deanery
- ☐ UK - outside my deanery
- ☐ Republic of Ireland
- ☐ I have not been refused funding
- ☐ Other (please specify)

\* 37. Are you a member of any of the following professional bodies or have any other professional fees to pay?

- ☐ General Medical Council or Irish Medical Council
- ☐ Royal College of Surgeons of Edinburgh
- ☐ Royal College of Surgeons of England
- ☐ Royal College of Physicians and Surgeons of Glasgow
- ☐ Royal College of Surgeons of Ireland
- ☐ Specialty associations eg ASGBI / SCTS / BOA / ENT-UK / BNS / BAPS / BAOMS / Vascular Society / BAPRAS etc
- ☐ Sub-specialty associations eg AUGIS / ACPGBI / BRS / ALSGBI / BASO / BTS etc
- ☐ Trainee associations eg ASiT / BOTA etc
- ☐ JCST (ISCP training fee)
- ☐ British Medical Association or Irish Medical Organization
- ☐ Hospital Consultants and Specialists Association
- ☐ MDU / MPS / other medical indemnity provider
- ☐ Royal Society of Medicine
- ☐ Journal subscriptions
- ☐ Regional training day fees
- ☐ Others (please specify)

\* 38. What is your current annual subscription to your surgical royal college? (to the nearest pound or euro)

\* 39. In the last year how much have you spent on specialty society memberships (excluding surgical royal colleges, to the nearest pound or euro)?

\* 40. In the last year how much have you spent on journal subscriptions (to the nearest pound or euro)?

\* 41. In the last year how much have you spent on text books (to the nearest pound or euro)?

10. Out of Training Fellowships and Postgraduate Degrees

\* 42. Have you undertaken a post-graduate degree since graduating from medical school?

- ☐ Yes- MD
- ☐ Yes- PhD/DPhil
- ☐ Yes- MSc
- ☐ Yes- MPhil
- ☐ Yes- MEd
- ☐ Yes- MA
- ☐ Yes- MS/MChir
- ☐ No

Yes- Other (please specify)

43. If yes, please estimate the cost of this degree to you personally in monetary terms. Please consider university fees and potential income lost that was not covered by any other funding source.

\* 44. Have you undertaken an overseas or other out-of-training fellowship?

- ☐ Yes
- ☐ No

45. If, yes, did this negatively impact on your financial situation, please describe.

## Cost of Surgical Training Survey 2015

### 11. Financial Advice

\* 46. Have you previously claimed tax relief from HM Revenue & Customs (or Revenue Tax and customs Ireland/Cain agus Custaim na hEireann) on any of the training and professional costs below? Please select all those that apply.

- ☐ GMC or Irish Medical Council
- ☐ Surgical Royal College
- ☐ MPS/MDU
- ☐ BMA or IMO
- ☐ Specialty Association
- ☐ Journal Subscriptions
- ☐ Exam Fees
- ☐ JCST
- ☐ Courses
- ☐ Conferences
- ☐ I have not claimed tax relief for any of the professional costs above

\* 47. Do you have, or have you ever consulted an accountant or financial advisor?

- ☐ Accountant
- ☐ Financial advisor
- ☐ Both
- ☐ Neither

## 12. The Non-Monetary Costs of Surgical Training

**Nearly there, this is the last page of questions!**

\* 48. How many times have you moved house for work?

- ☐ 1
- ☐ 2
- ☐ 3
- ☐ 4
- ☐ 5
- ☐ 6
- ☐ 7
- ☐ 8
- ☐ 9
- ☐ 10
- ☐ 11
- ☐ 12
- ☐ 13
- ☐ 14
- ☐ 15
- ☐ 16 or above

\* 49. With regards to childcare please select one of the following:

- ☐ I do not have children
- ☐ I have had to pay for weekend childcare to allow me to work
- ☐ I have had to pay for evening childcare to allow me to work
- ☐ I have had to pay for both evening and weekend childcare to allow me to work
- ☐ I have children but have not had to pay for evening or weekend childcare

50. Do you think your surgical training has had a significant cost in terms of any of the following:

|                                            | Yes                   | No                    |
|--------------------------------------------|-----------------------|-----------------------|
| Mental Health                              | <input type="radio"/> | <input type="radio"/> |
| Physical Health                            | <input type="radio"/> | <input type="radio"/> |
| Relationships                              | <input type="radio"/> | <input type="radio"/> |
| Financial Security                         | <input type="radio"/> | <input type="radio"/> |
| Ability to settle down in a permanent home | <input type="radio"/> | <input type="radio"/> |

Other (please specify)

51. Please answer the following questions

|                                                                                                              | Yes                   | No                    | Unsure                |
|--------------------------------------------------------------------------------------------------------------|-----------------------|-----------------------|-----------------------|
| I have missed a major family event due to clinical work                                                      | <input type="radio"/> | <input type="radio"/> | <input type="radio"/> |
| I have missed many family events due to clinical work                                                        | <input type="radio"/> | <input type="radio"/> | <input type="radio"/> |
| I have missed a major family event due to non-clinical work that was necessary for my career progression     | <input type="radio"/> | <input type="radio"/> | <input type="radio"/> |
| I have missed many major family events due to non-clinical work that was necessary for my career progression | <input type="radio"/> | <input type="radio"/> | <input type="radio"/> |
| Staffing levels in my current post impact negatively on my quality of life                                   | <input type="radio"/> | <input type="radio"/> | <input type="radio"/> |
| Rota patterns in my current post impact negatively on my quality of life                                     | <input type="radio"/> | <input type="radio"/> | <input type="radio"/> |

52. Please answer the following questions

|                                                                                                                                                                                                                                           | Yes                   | No                    | Maybe                 |
|-------------------------------------------------------------------------------------------------------------------------------------------------------------------------------------------------------------------------------------------|-----------------------|-----------------------|-----------------------|
| I would support a fixed "training fee", which I would pay annually throughout my training that would cover tuition, courses, exams and fees to professional bodies such as surgical royal colleges, the GMC and one specialty association | <input type="radio"/> | <input type="radio"/> | <input type="radio"/> |
| I would support raising the annual Surgical Royal College Subscription for all MEMBERS AND FELLOWS in order to subsume the costs of the JCST fee                                                                                          | <input type="radio"/> | <input type="radio"/> | <input type="radio"/> |
| I would be happy to fund (up to £500 or 700 euro) a boot-camp in my specialty during core training                                                                                                                                        | <input type="radio"/> | <input type="radio"/> | <input type="radio"/> |
| The cost of surgical training in the UK and Ireland is likely to dissuade me from a career in surgery                                                                                                                                     | <input type="radio"/> | <input type="radio"/> | <input type="radio"/> |
| The cost of training in the UK and Ireland is likely to make me leave medicine altogether                                                                                                                                                 | <input type="radio"/> | <input type="radio"/> | <input type="radio"/> |
| The cost of training in the UK and Ireland is likely to make me leave the UK or Ireland to work as a doctor elsewhere                                                                                                                     | <input type="radio"/> | <input type="radio"/> | <input type="radio"/> |

53. Are there any other comments you would like to make regarding the cost of surgical training, study budgets or any other related matters? Please use the box below.

54. Who do you think should contribute to the cost of surgical training? Please rank the stakeholders below, from most contribution (1), to least (9).

|                                              |                                   |                                 |
|----------------------------------------------|-----------------------------------|---------------------------------|
| <div><div></div><div></div><div></div></div> | <div><div></div><div></div></div> | The Government                  |
| <div><div></div><div></div><div></div></div> | <div><div></div><div></div></div> | NHS Trusts                      |
| <div><div></div><div></div><div></div></div> | <div><div></div><div></div></div> | Universities                    |
| <div><div></div><div></div><div></div></div> | <div><div></div><div></div></div> | Private sector providers        |
| <div><div></div><div></div><div></div></div> | <div><div></div><div></div></div> | Trainees                        |
| <div><div></div><div></div><div></div></div> | <div><div></div><div></div></div> | Surgical Royal Colleges         |
| <div><div></div><div></div><div></div></div> | <div><div></div><div></div></div> | Industry                        |
| <div><div></div><div></div><div></div></div> | <div><div></div><div></div></div> | Surgical specialty associations |

13. End of Survey

**Thank you for taking the time to complete this survey, we are very grateful for your responses.**

**The results will be freely disseminated, including through publication and on trainee association websites, and provided to Political Leaders, the Royal Colleges, JCST and Specialty Associations.**

**For more information about the work being undertaken on your behalf, please visit our website, email us or tweet:**

**www.asit.org  
info@asit.org  
@ASiTofficial**

**For more information regarding professional bodies approved for tax relief:**

**<https://www.gov.uk/government/publications/professional-bodies-approved-for-tax-relief-list-3/approved-professional-organisations-and-learned-societies#g>**
