# Supplementary material for: Cross-sectional study of the financial cost of training to the surgical trainee in the UK and Ireland
Source: PubMed Central journal article supplement — BMJ Open. 2017 Nov 15;7(11):e018086. doi: 10.1136/bmjopen-2017-018086 (PMC5695344; doi:10.1136/bmjopen-2017-018086), 2017-11-15
Supplement: bmjopen-2017-018086supp003.pdf [file bmjopen-2017-018086supp003.pdf]

### Appendix Three: Results for military trainees

There were 20 military trainee respondents. All 20 graduated from medical school in the UK: 19 (90%) graduated with debt on graduation (mean £18,650). 16 (80%) had a military grant at medical school, 10 (50%) had a government student loan and 4 (20%) had a bank or other loan. The mean amount paid out, that was not reimbursed, for courses was £4250, for conferences £1643, and £2130 for exams. Mean costs per year included surgical royal college subscription (£317), specialty society membership (£336), journals (£79), text books (£245). 7 had completed an MSc (35%), 5 an MD (25%) and 1 (5%) had done both since graduating from medical school (mean cost £12822).

| Which specialty do you intend to pursue?                                                  | What is your stage of training?                                                                                                                                                                                                                                                  |
|-------------------------------------------------------------------------------------------|----------------------------------------------------------------------------------------------------------------------------------------------------------------------------------------------------------------------------------------------------------------------------------|
| General Surgery: 6 (30%)<br>Trauma and Orthopaedics: 6 (30%)<br>Vascular Surgery: 2 (10%) | Foundation Year 1: 1 (5%)<br>Foundation Year 2: 0 (0%)<br>ST1/CT1/SHO1: 4 (20%)<br>ST2/CT2/SHO2: 2 (10%)<br>ST3/SPR1: 1 (5%)<br>ST4/SPR2: 4 (20%)<br>ST5/SPR3: 2 (10%)<br>ST6/SPR4: 1 (5%)<br>ST7/SPR5: 1 (5%)<br>ST8/SPR6: 1 (5%)<br>Post CCT: 1 (5%)<br>Research Post: 2 (10%) |

| Demographic                  | Military Trainees  |
|------------------------------|--------------------|
| <b>Number</b>                | 20                 |
| <b>Male: Female (%)</b>      | 14:6 (70:30%)      |
| <b>Mean Age (years)</b>      | 33.8 (range 27-41) |
| <b>LTFT Trainees (%)</b>     | 0 (0)              |
| <b>Academic Trainees (%)</b> | 1 (5%)             |
