# Supplementary material for: Cross-sectional study of the financial cost of training to the surgical trainee in the UK and Ireland
Source: PubMed Central journal article supplement — BMJ Open. 2017 Nov 15;7(11):e018086. doi: 10.1136/bmjopen-2017-018086 (PMC5695344; doi:10.1136/bmjopen-2017-018086), 2017-11-15
Supplement: bmjopen-2017-018086supp004.pdf [file bmjopen-2017-018086supp004.pdf]

#### **Appendix Four: Tables of costs to the trainee in each surgical specialty**

Using the published requirements for progression through surgical training we have provided an estimated breakdown of the costs to the trainee in each surgical specialty. The following tables of costs assume straight progression through F1-ST8 without taking time out for LTFT, post-graduate degrees or other career breaks. These prices are correct as of November 2016. July 2016 CCT guidance used as per JCST website. Conference costs do not include travel or subsistence.

*BMA= British Medical Association, CCT= Certificate of Completion of Training, CST= Core Surgical Trainee, CT= Core Training (year), FP=Foundation Programme, FRCS= Fellowship of the Royal College of Surgeons, GMC= General Medical Council, HST=Higher Surgical Trainee, JCST= Joint Committee on Surgical Training, MRCS= Membership of the Royal College of Surgeons, RCS= Surgical Royal College, RCSEng= Royal College of Surgeons of England, RCPSCG= Royal College of Physicians and Surgeons of Glasgow, ST= Specialty Trainee (year).*

## Cardiothoracic Surgery

| Requirements                                                                                                                                                                                                                                                                                                                                                                                                                     | Cost                                                                                                                                                                                                                                                          |
|----------------------------------------------------------------------------------------------------------------------------------------------------------------------------------------------------------------------------------------------------------------------------------------------------------------------------------------------------------------------------------------------------------------------------------|---------------------------------------------------------------------------------------------------------------------------------------------------------------------------------------------------------------------------------------------------------------|
| <p><i>Essential for Surgical Training</i></p> <p>JCST fee (for 8 years)</p> <p>GMC registration (for 10 years)</p>                                                                                                                                                                                                                                                                                                               | <p>£255 per year of surgical training</p> <p>£200 for FP1 year, £425 per year for FP2+</p>                                                                                                                                                                    |
| <p><i>Mandatory for progression to ST3</i></p> <p>MRCS examination</p>                                                                                                                                                                                                                                                                                                                                                           | <p>£1425</p>                                                                                                                                                                                                                                                  |
| <p><i>Desirable for progression to ST3</i></p> <p>RCSEng Basic Surgical Skills Course (BSS)</p> <p>Advanced Trauma Life Support Course (ATLS)</p> <p>RCSEng Care of the Critically Ill Surgical Patient Course (CCrISP)</p> <p>RCSEng Specialty Skills in Cardiothoracic Surgery Course</p>                                                                                                                                      | <p>£670.50</p> <p>£710</p> <p>£724</p> <p>£774</p>                                                                                                                                                                                                            |
| <p><i>Mandatory for CCT</i></p> <p>FRCS examination (including completion fee)</p> <p>Good Clinical Practice Course</p> <p>NHS Management Course e.g. BMA management essentials</p> <p>Training and Education Course e.g. RCSEng Training the Trainers</p> <p>National or international conference attendance each year of training e.g. Society for Cardiothoracic Surgery conference booked as early bird rate as a member</p> | <p>£2269</p> <p>Free</p> <p>£354</p> <p>£702</p> <p>£205 per year for 2 years as CST, £305 per year for 6 years as HST</p>                                                                                                                                    |
| <p><i>Other</i></p> <p>BMA Membership (for 10 years)</p> <p>RCS subscription fees e.g. RCSEng if complete MRCS at CT2 and FRCS as ST8</p> <p>Specialty Association Membership e.g. Society for Cardiothoracic Surgery</p> <p>Healthcare Protection Organisation (for 10 years) e.g. Medical Defence Union</p>                                                                                                                    | <p>£113 for FP1 year, £222 per year for FP2-CT2, £329 per year for ST3-5, £443 per year ST6+</p> <p>£316 per year for 5 years as member, £531 for 1 year as fellow</p> <p>£100 per year for 2 years as CST, £200 per year for 6 years as HST</p> <p>£1800</p> |
| <b>TOTAL ESTIMATE</b>                                                                                                                                                                                                                                                                                                                                                                                                            | <b>£24039.00</b>                                                                                                                                                                                                                                              |

## General Surgery

| Requirements                                                                                                                                                                     | Cost                                                                                      |
|----------------------------------------------------------------------------------------------------------------------------------------------------------------------------------|-------------------------------------------------------------------------------------------|
| <i>Essential for Surgical Training</i>                                                                                                                                           |                                                                                           |
| JCST fee (for 8 years)                                                                                                                                                           | £255 per year of surgical training                                                        |
| GMC registration (for 10 years)                                                                                                                                                  | £200 for FP1 year, £425 per year for FP2+                                                 |
| <i>Mandatory for progression to ST3</i>                                                                                                                                          |                                                                                           |
| MRCS examination                                                                                                                                                                 | £1425                                                                                     |
| RCSEng Basic Surgical Skills Course (BSS)                                                                                                                                        | £670.50                                                                                   |
| Advanced Trauma Life Support Course (ATLS)                                                                                                                                       | £650                                                                                      |
| RCSEng Care of the Critically Ill Surgical Patient Course (CCrISP)                                                                                                               | £724                                                                                      |
| <i>Mandatory for CCT</i>                                                                                                                                                         |                                                                                           |
| FRCS examination (and completion fee)                                                                                                                                            | £2269                                                                                     |
| Good Clinical Practice Course                                                                                                                                                    | Free                                                                                      |
| NHS Management Course e.g. BMA management essentials                                                                                                                             | £354                                                                                      |
| Training and Education Course e.g. RCSEng Training the Trainers                                                                                                                  | £702                                                                                      |
| Course relevant to specialist interest e.g. RCSEng specialty skills in coloproctology                                                                                            | £585                                                                                      |
| ATLS revalidation to keep valid at time of certification                                                                                                                         | £350                                                                                      |
| Attendance at 4 national or international conferences during training e.g. Association of Surgeons of Great Britain and Ireland conference booked as early bird rate as a member | £260 per year for 4 years                                                                 |
| <i>Other</i>                                                                                                                                                                     |                                                                                           |
| BMA Membership (for 10 years)                                                                                                                                                    | £113 for FP1 year, £222 per year for FP2-CT2, £329 per year for ST3-5, £443 per year ST6+ |
| RCS subscription fees e.g. RCSEng if complete MRCS at CT2 and FRCS as ST8                                                                                                        | £316 per year for 5 years as member, £531 for 1 year as fellow                            |
| Specialty Association Membership e.g. Association of Surgeons of Great Britain and Ireland                                                                                       | £81 per year for 8 years                                                                  |
| Healthcare Protection Organisation (for 10 years) e.g. Medical Defence Union                                                                                                     | £1800                                                                                     |
| <b>TOTAL ESTIMATE</b>                                                                                                                                                            | <b>£22488.50</b>                                                                          |

## Neurosurgery

| Requirements                                                                                                                                                                                                                                                                                                                                                                                                                                                                                                                                                     | Cost                                                                                                                                                                                                                 |
|------------------------------------------------------------------------------------------------------------------------------------------------------------------------------------------------------------------------------------------------------------------------------------------------------------------------------------------------------------------------------------------------------------------------------------------------------------------------------------------------------------------------------------------------------------------|----------------------------------------------------------------------------------------------------------------------------------------------------------------------------------------------------------------------|
| <p><i>Essential for Surgical Training</i></p> <p>JCST fee (for 8 years)</p> <p>GMC registration (for 10 years)</p>                                                                                                                                                                                                                                                                                                                                                                                                                                               | <p>£255 per year of surgical training</p> <p>£200 for FP1 year, £425 per year for FP2+</p>                                                                                                                           |
| <p><i>Mandatory for progression to ST3</i></p> <p>MRCS examination</p>                                                                                                                                                                                                                                                                                                                                                                                                                                                                                           | <p>£1425.00</p>                                                                                                                                                                                                      |
| <p><i>Desirable for progression to ST3</i></p> <p>RCSEng Basic Surgical Skills Course (BSS)</p> <p>Advanced Trauma Life Support Course (ATLS)</p> <p>RCSEng Care of the Critically Ill Surgical Patient Course (CCrISP)</p>                                                                                                                                                                                                                                                                                                                                      | <p>£670.50</p> <p>£650.00</p> <p>£724.00</p>                                                                                                                                                                         |
| <p><i>Mandatory for CCT</i></p> <p>FRCS examination (including completion fee)</p> <p>Good Clinical Practice Course</p> <p>Research Methodology Course</p> <p>NHS Management Course e.g. BMA management essentials</p> <p>Training and Education Course e.g. RCSEng Training the Trainers</p> <p>Advanced Trauma Life Support Course (ATLS) completed during training</p> <p>Attendance at 4 national or international conferences during training e.g. Society of British Neurological Surgeons conference booked as early bird rate as an affiliate member</p> | <p>£2269.00</p> <p>Free</p> <p>Free</p> <p>£354.00</p> <p>£702.00</p> <p>included above</p> <p>£150 per year for 4 years</p>                                                                                         |
| <p><i>Other</i></p> <p>BMA Membership (for 10 years)</p> <p>RCS subscription fees e.g. RCSEng if complete MRCS at CT2 and FRCS as ST8</p> <p>Specialty Association Membership e.g. Society of British Neurological Surgeons</p> <p>Healthcare Protection Organisation (for 10 years) e.g. Medical Defence Union</p>                                                                                                                                                                                                                                              | <p>£113 for FP1 year, £222 per year for FP2-CT2, £329 per year for ST3-5, £443 per year ST6+</p> <p>£316 per year for 5 years as member, £531 for 1 year as fellow</p> <p>£145 per year for 8 years</p> <p>£1800</p> |
| <b>TOTAL ESTIMATE</b>                                                                                                                                                                                                                                                                                                                                                                                                                                                                                                                                            | <b>£21625.50</b>                                                                                                                                                                                                     |

## Oral and Maxillofacial Surgery

| Requirements                                                                                                  | Cost                                      |
|---------------------------------------------------------------------------------------------------------------|-------------------------------------------|
| <i>Essential for Surgical Training</i>                                                                        |                                           |
| Bachelor of Dental Surgery e.g. University of Liverpool BDS graduate entry                                    | £9000 for 4 years                         |
| JCST fee (for 7 years)                                                                                        | £255 per year of surgical training        |
| GMC registration (for 9 years)                                                                                | £200 for FP1 year, £425 per year for FP2+ |
| GDC registration (for 9 years)                                                                                | £890 per year                             |
| <i>Mandatory for progression to ST3</i>                                                                       |                                           |
| MRCS examination                                                                                              | £1425                                     |
| <i>Desirable for progression to ST3</i>                                                                       |                                           |
| Advanced Trauma Life Support Course (ATLS)                                                                    | £650                                      |
| RCSEng Care of the Critically Ill Surgical Patient Course (CCrISP)                                            | £724                                      |
| Acute Life-threatening Events Recognition and Treatment (ALERT) Course                                        | £95                                       |
| <i>Mandatory for CCT</i>                                                                                      |                                           |
| FRCS examination (including completion fee)                                                                   | £2269                                     |
| Good Clinical Practice Course                                                                                 | Free                                      |
| Research Methodology Course                                                                                   | Free                                      |
| NHS Management Course e.g. BMA management essentials                                                          | £354                                      |
| Training and Education Course e.g. RCSEng Training the Trainers                                               | £702                                      |
| ATLS revalidation to keep valid at time of certification                                                      | £350                                      |
| Emergency Skills Course e.g. RCSEng Emergency Skills in Oral and Maxillofacial Surgery                        | £877.50                                   |
| Basic Plating Course e.g. AO basic OMFS plating course                                                        | £499                                      |
| Head and Neck Anatomy Course e.g. RCSEng basic surgical anatomy of the head and neck                          | £414                                      |
| Surgical Dermatology Course e.g. RCSEd Facial aesthetics course                                               | £785                                      |
| Orthognathic Course e.g. 6 <sup>th</sup> biennial Glasgow course                                              | £495                                      |
| Microvascular Course e.g. University of Liverpool microvascular course                                        | £1400                                     |
| Complex/Advanced Trauma Course inc. condylar fractures and orbital access e.g. SORG course                    | £1500                                     |
| 3 advanced sub-specialty courses:                                                                             |                                           |
| e.g. Establishing a modern salivary gland practice                                                            | £1250                                     |
| e.g. Newcastle functional septorhinoplasty and facial plastics cadaveric course                               | £950                                      |
| e.g. Controversies in the management of head and neck cancer                                                  | £275                                      |
| National or international conference attendance e.g. BAOMS Conference booked as early bird rate as a member * | £200                                      |

|                                                                                              |                                                                                           |
|----------------------------------------------------------------------------------------------|-------------------------------------------------------------------------------------------|
| <i>Other</i>                                                                                 |                                                                                           |
| BMA Membership (for 9 years)                                                                 | £113 for FP1 year, £222 per year for FP2-CT2, £329 per year for ST3-5, £443 per year ST6+ |
| RCS subscription fees e.g. RCSEng if complete MRCS at CT2 and FRCS as ST7                    | £316 per year for 4 years as member, £531 for 1 year as fellow                            |
| Specialty Association Membership e.g. British Association of Oral and Maxillofacial Surgeons | £85 per year for 7 years                                                                  |
| Healthcare Protection Organisation (for 9 years) e.g. Medical Defence Union                  | £1325                                                                                     |
| <b>TOTAL ESTIMATE</b>                                                                        | <b>£71431.50</b>                                                                          |

\* Where no minimum number of attendances documented a minimum of 1 included

## Otolaryngology

| Requirements                                                                                                                                                                                                                                                                                                                                                                                                                                                                                                                                                                                                                                                                     | Cost                                                                                                                                                                                                      |
|----------------------------------------------------------------------------------------------------------------------------------------------------------------------------------------------------------------------------------------------------------------------------------------------------------------------------------------------------------------------------------------------------------------------------------------------------------------------------------------------------------------------------------------------------------------------------------------------------------------------------------------------------------------------------------|-----------------------------------------------------------------------------------------------------------------------------------------------------------------------------------------------------------|
| <i>Essential for Surgical Training</i><br>JCST fee (for 8 years)<br>GMC registration (for 10 years)                                                                                                                                                                                                                                                                                                                                                                                                                                                                                                                                                                              | £255 per year of surgical training<br>£200 for FP1 year, £425 per year for FP2+                                                                                                                           |
| <i>Mandatory for progression to ST3</i><br>Diploma of Otolaryngology Head and Neck Surgery (DO-HNS)                                                                                                                                                                                                                                                                                                                                                                                                                                                                                                                                                                              | £932.00                                                                                                                                                                                                   |
| <i>Desirable for progression to ST3</i><br>RCSEng Basic Surgical Skills Course (BSS)<br>Advanced Trauma Life Support Course (ATLS)<br>RCSEng Care of the Critically Ill Surgical Patient Course (CCrISP)<br>Advanced Life Support Course<br>Advanced Paediatric Life Support Course and 2 x ENT courses                                                                                                                                                                                                                                                                                                                                                                          | £670.50<br>£650<br>£724<br>£550<br>see below                                                                                                                                                              |
| <i>Mandatory for CCT</i><br>FRCS examination (including completion fee)<br>Good Clinical Practice Course<br>Research Methodology Course<br>Training and Education Course e.g. RCSEng Training the Trainers<br>Temporal Bone Dissection Course e.g. Cuschieri Skills Course<br>Sinus Anatomy and Surgical Dissection Course e.g. Cuschieri Skills Course<br>Head and Neck Surgery Course (including LASER) e.g. RCSEd Head and Neck Course Module 1 and 2<br>Septorhinoplasty and Facial Plastics Surgery Course e.g. NSTC Course<br>Advanced Paediatric Life Support Course<br>National or international conference attendance e.g. BACO Conference booked as an ENT-UK member * | £2269<br>Free<br>Free<br>£702<br>£225<br>£275<br>£850 and £1050<br>£350<br>£395<br>£825                                                                                                                   |
| <i>Other</i><br>BMA Membership (for 10 years)<br><br>RCS subscription fees e.g. RCSEng if complete MRCS at CT2 and FRCS as ST8<br><br>Specialty Association Membership e.g. ENT-UK<br>Healthcare Protection Organisation (for 10 years) e.g. Medical Defence Union                                                                                                                                                                                                                                                                                                                                                                                                               | £113 for FP1 year, £222 per year for FP2-CT2, £329 per year for ST3-5, £443 per year ST6+<br><br>£316 per year for 5 years as member, £531 for 1 year as fellow<br><br>£210 per year for 8 years<br>£1800 |
| <b>TOTAL ESTIMATE</b>                                                                                                                                                                                                                                                                                                                                                                                                                                                                                                                                                                                                                                                            | <b>£25218.50</b>                                                                                                                                                                                          |

\* Where no minimum number of attendances documented a minimum of 1 included

## Paediatric Surgery

| Requirements                                                                                                                                       | Cost                                                                                      |
|----------------------------------------------------------------------------------------------------------------------------------------------------|-------------------------------------------------------------------------------------------|
| <i>Essential for Surgical Training</i>                                                                                                             |                                                                                           |
| JCST fee (for 8 years)                                                                                                                             | £255 per year of surgical training                                                        |
| GMC registration (for 10 years)                                                                                                                    | £200 for FP1 year, £425 per year for FP2+                                                 |
| <i>Mandatory for progression to ST3</i>                                                                                                            |                                                                                           |
| MRCS examination                                                                                                                                   | £1425                                                                                     |
| Advanced Paediatric Life Support Course                                                                                                            | £395                                                                                      |
| <i>Desirable for progression to ST3</i>                                                                                                            |                                                                                           |
| RCSEng Basic Surgical Skills Course (BSS)                                                                                                          | £670.50                                                                                   |
| Advanced Trauma Life Support Course (ATLS)                                                                                                         | £650                                                                                      |
| RCSEng Care of the Critically Ill Surgical Patient Course (CCrISP)                                                                                 | £724                                                                                      |
| <i>Mandatory for CCT</i>                                                                                                                           |                                                                                           |
| FRCS examination (including completion fee)                                                                                                        | £2269                                                                                     |
| Good Clinical Practice Course                                                                                                                      | Free                                                                                      |
| Research Methodology Course                                                                                                                        | Free                                                                                      |
| NHS Management Course e.g. BMA management essentials                                                                                               | £354                                                                                      |
| Training and Education Course e.g. RCSEng Training the Trainers                                                                                    | £702                                                                                      |
| ATLS revalidation to keep valid at time of certification                                                                                           | £350                                                                                      |
| National or international conference attendance e.g. British Association of Paediatric Surgeons conference booked as early bird rate as a member * | £150                                                                                      |
| <i>Other</i>                                                                                                                                       |                                                                                           |
| BMA Membership (for 10 years)                                                                                                                      | £113 for FP1 year, £222 per year for FP2-CT2, £329 per year for ST3-5, £443 per year ST6+ |
| RCS subscription fees e.g. RCSEng if complete MRCS at CT2 and FRCS as ST8                                                                          | £316 per year for 5 years as member, £531 for 1 year as fellow                            |
| Specialty Association Membership e.g. British Association of Paediatric Surgeons                                                                   | £110 per year for 8 years                                                                 |
| Healthcare Protection Organisation (for 10 years) e.g. Medical Defence Union                                                                       | £1800                                                                                     |
| <b>TOTAL ESTIMATE</b>                                                                                                                              | <b>£21640.50</b>                                                                          |

\* Where no minimum number of attendances documented a minimum of 1 included



## Plastic Surgery

| Requirements                                                                                                                                                                                                                                                                                                  | Cost                                                                                                                                                                                                                                              |
|---------------------------------------------------------------------------------------------------------------------------------------------------------------------------------------------------------------------------------------------------------------------------------------------------------------|---------------------------------------------------------------------------------------------------------------------------------------------------------------------------------------------------------------------------------------------------|
| <p><i>Essential for Surgical Training</i></p> <p>JCST fee (for 8 years)</p> <p>GMC registration (for 10 years)</p>                                                                                                                                                                                            | <p>£255 per year of surgical training</p> <p>£200 for FP1 year, £425 per year for FP2+</p>                                                                                                                                                        |
| <p><i>Mandatory for progression to ST3</i></p> <p>MRCS examination</p>                                                                                                                                                                                                                                        | <p>£1425</p>                                                                                                                                                                                                                                      |
| <p><i>Desirable for progression to ST3</i></p> <p>RCSEng Basic Surgical Skills Course (BSS)</p> <p>Advanced Trauma Life Support Course (ATLS)</p> <p>RCSEng Care of the Critically Ill Surgical Patient Course (CCrISP)</p>                                                                                   | <p>£670.50</p> <p>£650</p> <p>£724</p>                                                                                                                                                                                                            |
| <p><i>Mandatory for CCT</i></p> <p>FRCS examination (including completion fee)</p> <p>Good Clinical Practice Course</p> <p>Research Methodology Course</p> <p>Training and Education Course e.g. RCSEng Training the Trainers</p> <p>Advanced Trauma Life Support Course (ATLS) completed during training</p> | <p>£2269</p> <p>Free</p> <p>Free</p> <p>£702</p> <p>included above</p>                                                                                                                                                                            |
| <p><i>Other</i></p> <p>BMA Membership (for 10 years)</p> <p>RCS subscription fees e.g. RCSEng if complete MRCS at CT2 and FRCS as ST8</p> <p>Specialty Association Membership e.g. BAPRAS</p> <p>Healthcare Protection Organisation (for 10 years) e.g. Medical Defence Union</p>                             | <p>£113 for FP1 year, £222 per year for FP2-CT2, £329 per year for ST3-5, £443 per year ST6+</p> <p>£316 per year for 5 years as member, £531 for 1 year as fellow</p> <p>£150 per year for 7 years (first year membership free)</p> <p>£1800</p> |
| <b>TOTAL ESTIMATE</b>                                                                                                                                                                                                                                                                                         | <b>£20561.50</b>                                                                                                                                                                                                                                  |

## Trauma and Orthopaedic Surgery

| Requirements                                                                                                                                                                                                                                                                                                                                                                                   | Cost                                                                                                                                                                                                                                                                                                                 |
|------------------------------------------------------------------------------------------------------------------------------------------------------------------------------------------------------------------------------------------------------------------------------------------------------------------------------------------------------------------------------------------------|----------------------------------------------------------------------------------------------------------------------------------------------------------------------------------------------------------------------------------------------------------------------------------------------------------------------|
| <i>Essential for Surgical Training</i><br>JCST fee (for 8 years)<br>GMC registration (for 10 years)                                                                                                                                                                                                                                                                                            | £255 per year of surgical training<br>£200 for FP1 year, £425 per year for FP2+                                                                                                                                                                                                                                      |
| <i>Mandatory for progression to ST3</i><br>MRCS examination<br>Advanced Trauma Life Support Course (ATLS)                                                                                                                                                                                                                                                                                      | £1425<br>£650                                                                                                                                                                                                                                                                                                        |
| <i>Desirable for progression to ST3</i><br>RCSEng Basic Surgical Skills Course (BSS)<br>RCSEng Care of the Critically Ill Surgical Patient Course (CCrISP)<br>Basic Course on Fracture Management e.g. RCPSCG principles of casting for orthopaedic trainees                                                                                                                                   | £670.50<br>£724<br>£20                                                                                                                                                                                                                                                                                               |
| <i>Mandatory for CCT</i><br>FRCS examination (including completion fee)<br>Good Clinical Practice Course<br>Research Methodology Course<br>Training and Education Course e.g. RCSEng Training the Trainers<br>ATLS revalidation to keep valid at time of certification<br>National or international conference attendance e.g. British Orthopaedic Association conference booked as a member * | £2269<br>Free<br>Free<br>£702<br>£350<br>Free                                                                                                                                                                                                                                                                        |
| <i>Other</i><br>BMA Membership (for 10 years)<br><br>RCS subscription fees e.g. RCSEng if complete MRCS at CT2 and FRCS as ST8<br><br>Specialty Association Membership e.g. British Orthopaedic Association<br><br>Healthcare Protection Organisation (for 10 years) e.g. Medical Defence Union                                                                                                | £113 for FP1 year, £222 per year for FP2-CT2, £329 per year for ST3-5, £443 per year ST6+<br>£316 per year for 5 years as member, £531 for 1 year as fellow<br>£152 per year for 2 years as CST, £166 per year for 2 years as ST3-4, £204 per year for 2 years as ST5-6, £240 per year for 2 years as ST7-8<br>£1800 |
| <b>TOTAL ESTIMATE</b>                                                                                                                                                                                                                                                                                                                                                                          | <b>£21405.50</b>                                                                                                                                                                                                                                                                                                     |

\* Where no minimum number of attendances documented a minimum of 1 included

## Urology

| Requirements                                                                                                                                                                                                                                                                                                                                                                                                                                                                                                                                                                                                                                                                                                                                                                                                                                                                                                     | Cost                                                                                                                                                                                                                                         |
|------------------------------------------------------------------------------------------------------------------------------------------------------------------------------------------------------------------------------------------------------------------------------------------------------------------------------------------------------------------------------------------------------------------------------------------------------------------------------------------------------------------------------------------------------------------------------------------------------------------------------------------------------------------------------------------------------------------------------------------------------------------------------------------------------------------------------------------------------------------------------------------------------------------|----------------------------------------------------------------------------------------------------------------------------------------------------------------------------------------------------------------------------------------------|
| <p><i>Essential for Surgical Training</i><br/>           JCST fee (for 7 years)<br/>           GMC registration (for 9 years)</p>                                                                                                                                                                                                                                                                                                                                                                                                                                                                                                                                                                                                                                                                                                                                                                                | <p>£255 per year of surgical training<br/>           £200 for FP1 year, £425 per year for FP2+</p>                                                                                                                                           |
| <p><i>Mandatory for progression to ST3</i><br/>           MRCS examination</p>                                                                                                                                                                                                                                                                                                                                                                                                                                                                                                                                                                                                                                                                                                                                                                                                                                   | <p>£1425</p>                                                                                                                                                                                                                                 |
| <p><i>Desirable for progression to ST3</i><br/>           RCSEng Basic Surgical Skills Course (BSS)<br/>           Advanced Trauma Life Support Course (ATLS)<br/>           RCSEng Care of the Critically Ill Surgical Patient Course (CCrISP)</p>                                                                                                                                                                                                                                                                                                                                                                                                                                                                                                                                                                                                                                                              | <p>£670.50<br/>           £650<br/>           £724</p>                                                                                                                                                                                       |
| <p><i>Mandatory for CCT</i><br/>           FRCS examination (including completion fee)<br/>           Good Clinical Practice Course<br/>           Research Methodology Course<br/>           NHS Management Course e.g. BMA management essentials<br/>           Training and Education Course e.g. RCSEng Training the Trainers<br/>           ATLS revalidation to keep valid at time of certification<br/>           Urodynamics Course e.g. Belfast Training Academy Course<br/>           Paediatric Urology Course e.g. BAPU Course<br/>           Spinal Injuries Course e.g. Princess Royal Spinal Unit Course<br/>           Emergency Urology Course e.g. East of England Emergency Urology Course<br/>           Attendance at 1 national or international conference every 2 years of training e.g. British Association of Urological Surgeons Conference booked as early bird rate as a member</p> | <p>£2269<br/>           Free<br/>           Free<br/>           £354<br/>           £702<br/>           £350<br/>           £187.50<br/>           £295<br/>           £450<br/>           £65<br/>           £100 per year for 3 years</p>  |
| <p><i>Other</i><br/>           BMA Membership (for 9 years)<br/>           RCS subscription fees e.g. RCSEng if complete MRCS at CT2 and FRCS as ST7<br/>           Specialty Association Membership e.g. British Association of Urological Surgeons<br/>           Healthcare Protection Organisation (for 9 years) e.g. Medical Defence Union</p>                                                                                                                                                                                                                                                                                                                                                                                                                                                                                                                                                              | <p>£113 for FP1 year, £222 per year for FP2-CT2, £329 per year for ST3-5, £443 per year ST6+<br/>           £316 per year for 4 years as member, £531 for 1 year as fellow<br/>           £160 per year for 7 years<br/>           £1325</p> |
| <b>TOTAL ESTIMATE</b>                                                                                                                                                                                                                                                                                                                                                                                                                                                                                                                                                                                                                                                                                                                                                                                                                                                                                            | <b>£20719</b>                                                                                                                                                                                                                                |

## Vascular Surgery

| Requirements                                                                                                                                                                                                                                                                                                                                                                                                                                                                                         | Cost                                                                                                                                                                                                                 |
|------------------------------------------------------------------------------------------------------------------------------------------------------------------------------------------------------------------------------------------------------------------------------------------------------------------------------------------------------------------------------------------------------------------------------------------------------------------------------------------------------|----------------------------------------------------------------------------------------------------------------------------------------------------------------------------------------------------------------------|
| <p><i>Essential for Surgical Training</i></p> <p>JCST fee (for 8 years)</p> <p>GMC registration (for 10 years)</p>                                                                                                                                                                                                                                                                                                                                                                                   | <p>£255 per year of surgical training</p> <p>£200 for FP1 year, £425 per year for FP2+</p>                                                                                                                           |
| <p><i>Mandatory for progression to ST3</i></p> <p>MRCS examination</p> <p>RCSEng Basic Surgical Skills Course (BSS)</p> <p>Advanced Trauma Life Support Course (ATLS)</p> <p>RCSEng Care of the Critically Ill Surgical Patient Course (CCrISP)</p>                                                                                                                                                                                                                                                  | <p>£1425</p> <p>£670.50</p> <p>£650</p> <p>£724</p>                                                                                                                                                                  |
| <p><i>Mandatory for CCT</i></p> <p>FRCS examination (including completion fee)</p> <p>Good Clinical Practice Course</p> <p>Research Methodology Course</p> <p>NHS Management Course e.g. BMA management essentials</p> <p>Training and Education Course e.g. RCSEng Training the Trainers</p> <p>ATLS revalidation to keep valid at time of certification</p> <p>National or international conference attendance per year e.g. Vascular Society Conference booked as a member at early bird rate</p> | <p>£2269</p> <p>Free</p> <p>Free</p> <p>£354</p> <p>£702</p> <p>£350</p> <p>£375 per year for 8 years</p>                                                                                                            |
| <p><i>Other</i></p> <p>BMA Membership (for 10 years)</p> <p>RCS subscription fees e.g. RCSEng if complete MRCS at CT2 and FRCS as ST7</p> <p>Specialty Association Membership e.g. Vascular Society</p> <p>Healthcare Protection Organisation (for 10 years) e.g. Medical Defence Union</p>                                                                                                                                                                                                          | <p>£113 for FP1 year, £222 per year for FP2-CT2, £329 per year for ST3-5, £443 per year ST6+</p> <p>£316 per year for 5 years as member, £531 for 1 year as fellow</p> <p>£115 per year for 8 years</p> <p>£1800</p> |
| <b>TOTAL ESTIMATE</b>                                                                                                                                                                                                                                                                                                                                                                                                                                                                                | <b>£24135.50</b>                                                                                                                                                                                                     |
